# Supplementary material for: Synthesis of 2-alkyl substituted benzimidazoles under microwave irradiation: Anti-proliferative effect of some representative compounds on human histiocytic lymphoma cell U937
Source: Royal Society of Chemistry journal article supplement (doi:10.1039/c1ra00470k), 2011-01-01

# Synthesis of 2-alkyl substituted benzimidazoles under microwave irradiation: Anti-proliferative effect of some representative compounds on human histiocytic lymphoma cell U937

Chhanda Mukhopadhyay,<sup>\*a</sup> Sabari Ghosh,<sup>a</sup> Sumita Sengupta (Bandyopadhyay)<sup>b</sup> and Soumasree De<sup>b</sup>

<sup>a</sup>Department of Chemistry, University of Calcutta, 92 APC Road, Kolkata-700009, India; Tel: +91 9433019610; E-mail: cmukhop@yahoo.co.in

<sup>b</sup> Department of Biophysics, Molecular Biology and Bioinformatics, University of Calcutta, 92 APC Road, Kolkata-700009, India

## Supplementary Information Part 3

### 2D NMR of Compound 3p in DMSO-*d*<sub>6</sub>

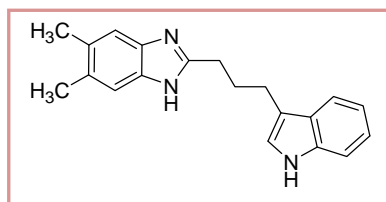

### COSY (Compound 3p)

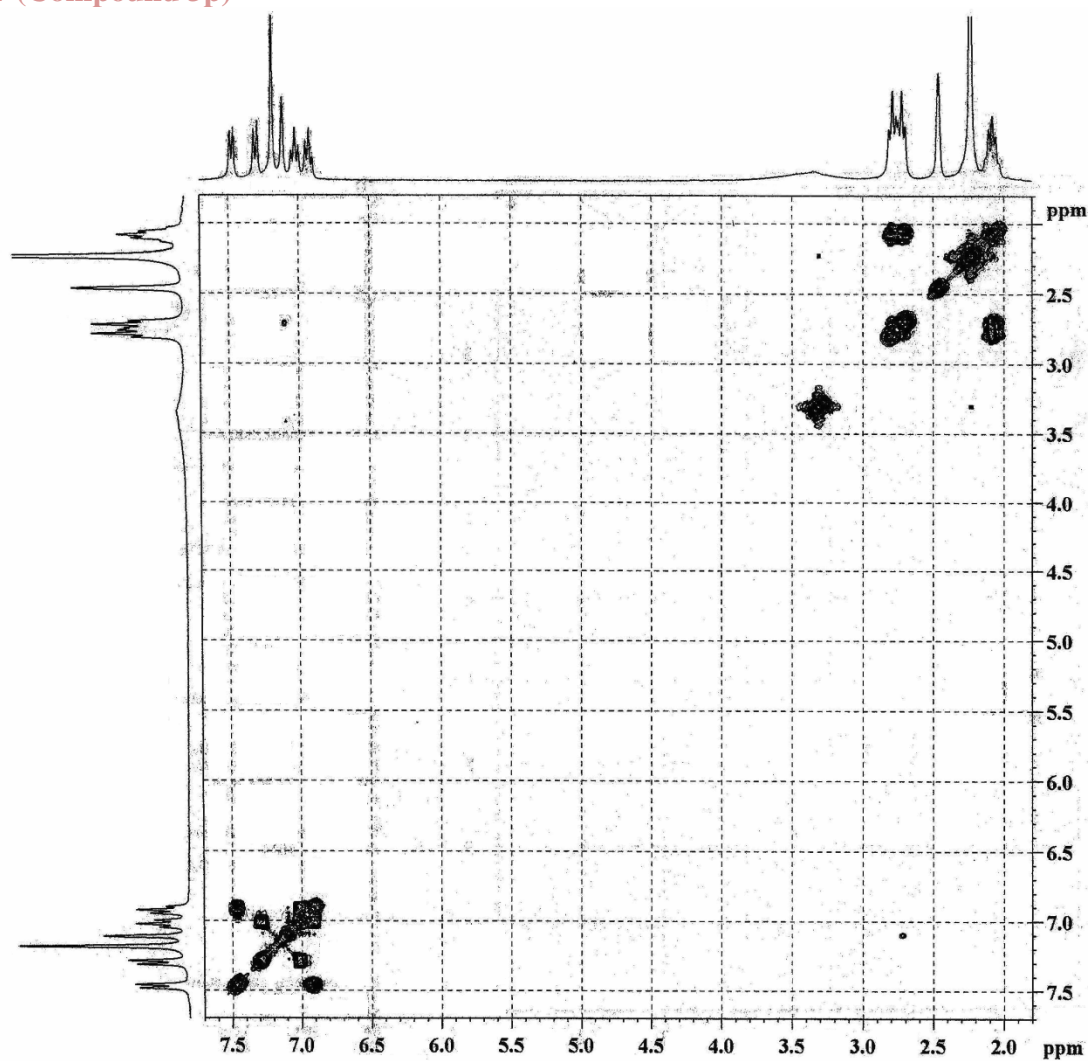

### COSY expansion 1 (Compound 3p)

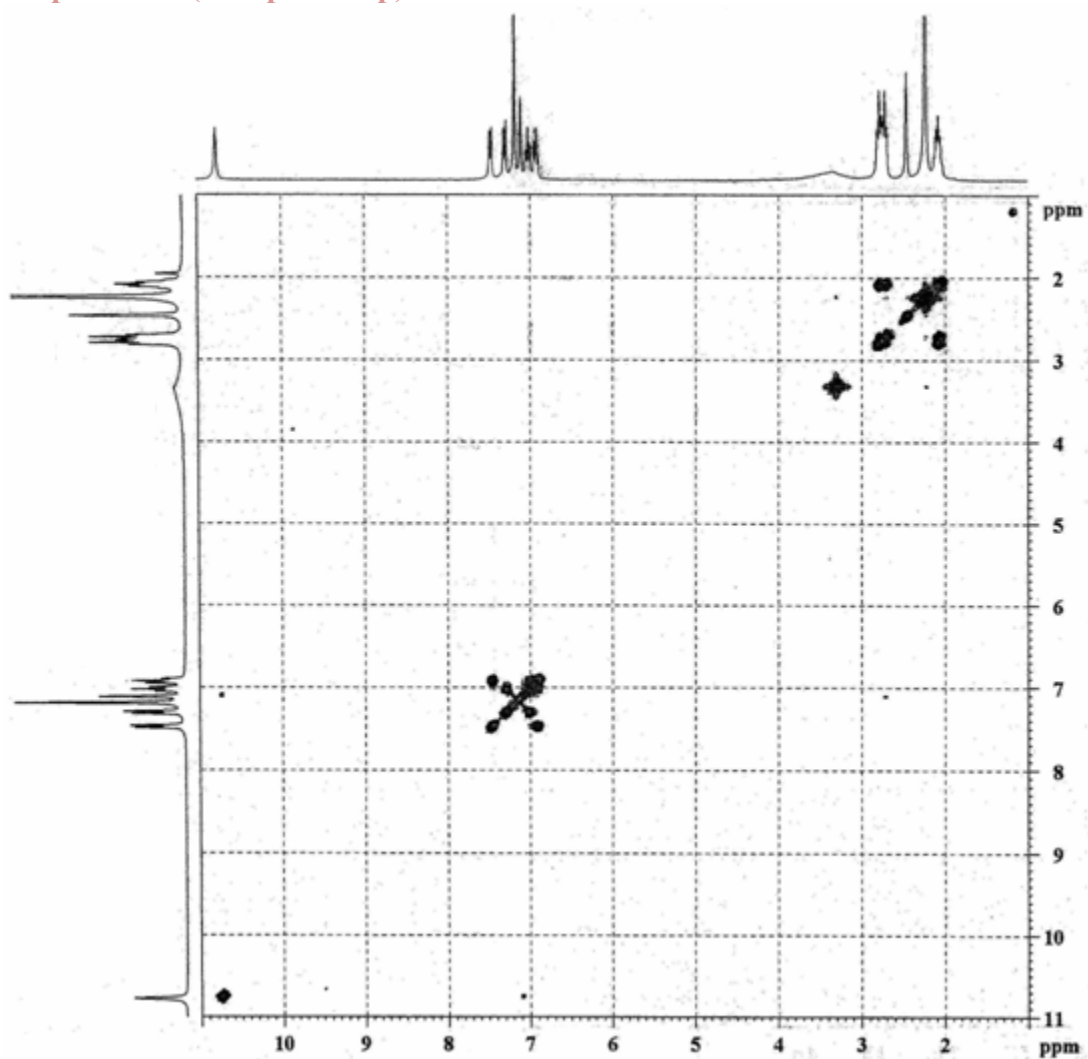

### COSY expansion 2 (Compound 3p)

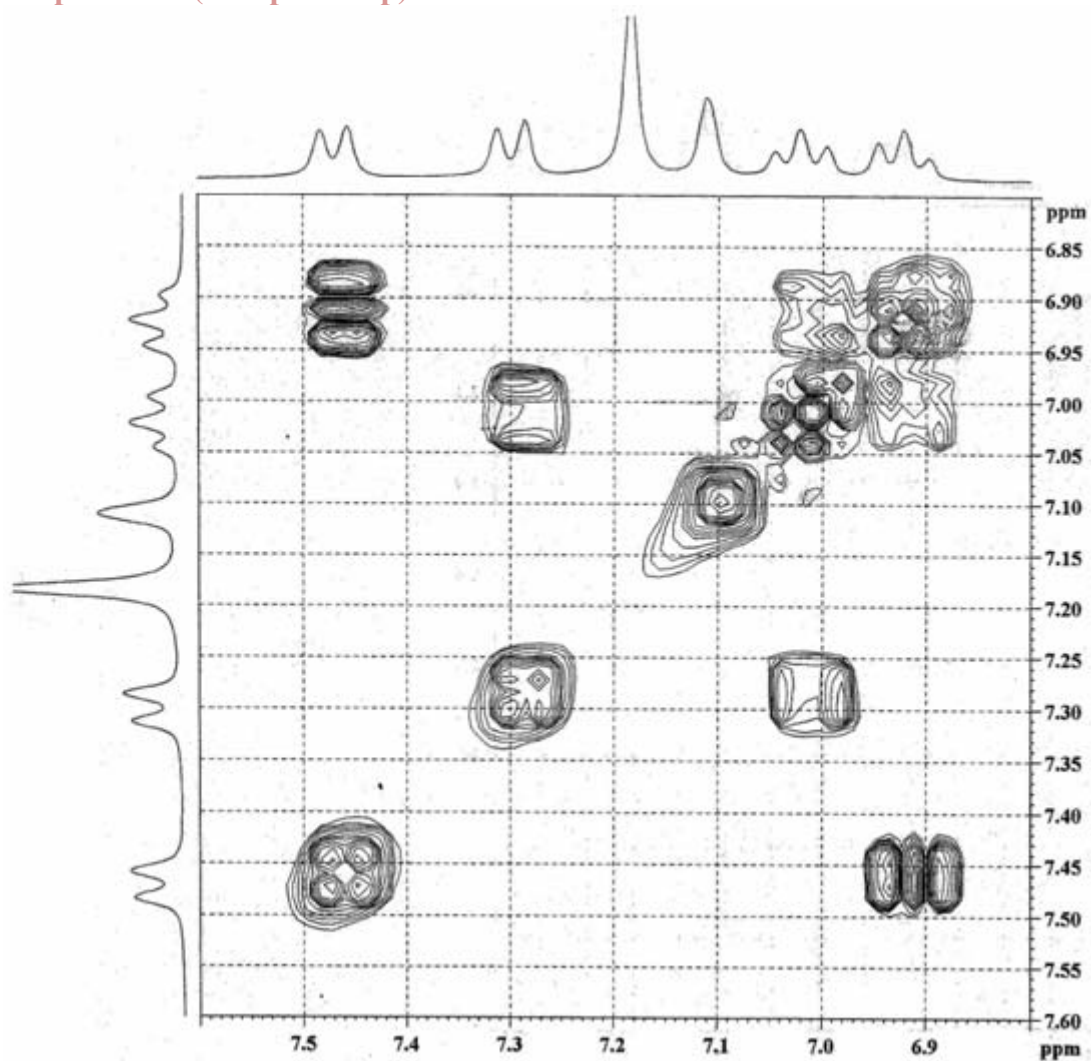

### COSY expansion 3 (Compound 3p)

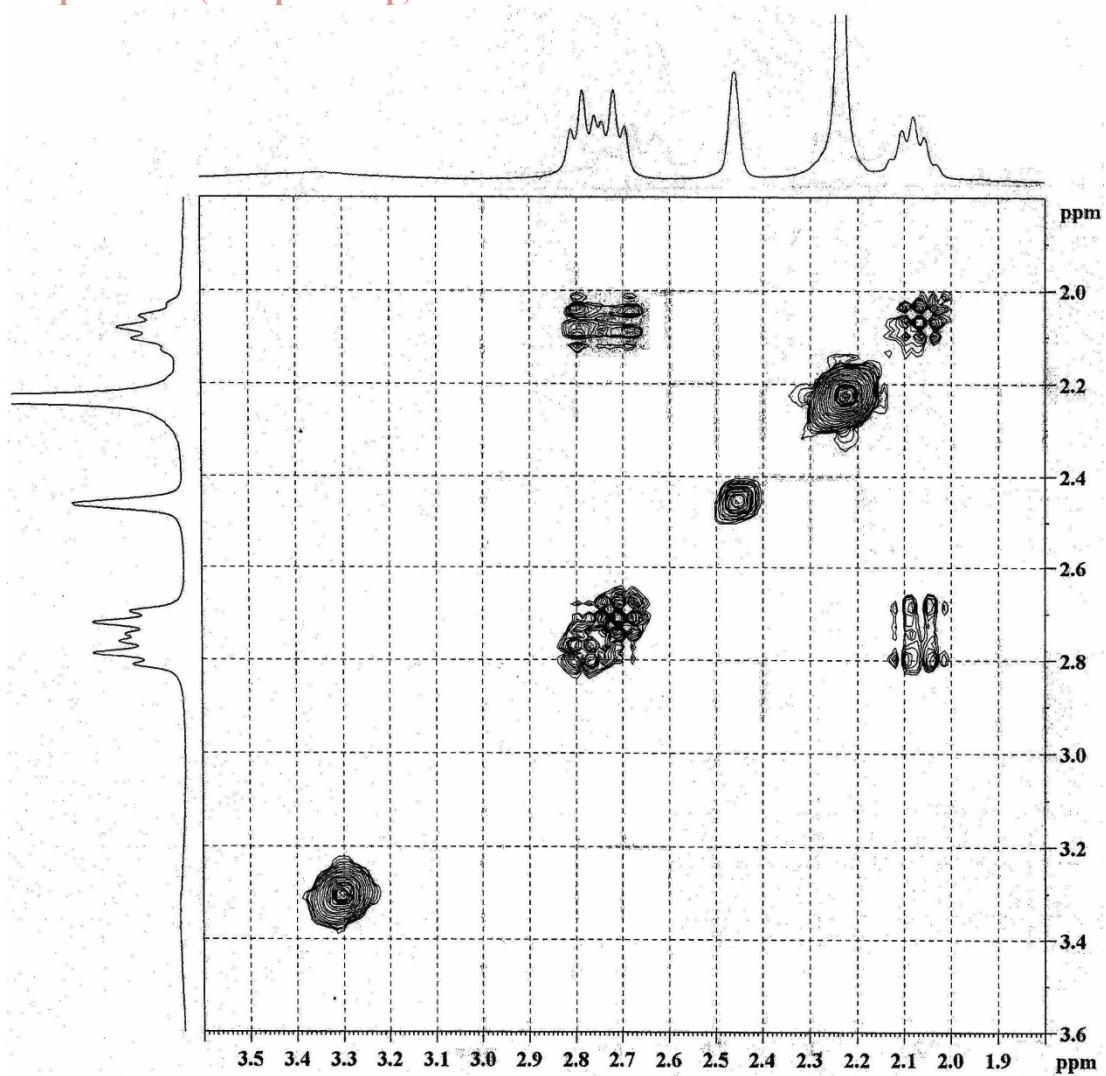

### HSQC (Compound 3p)

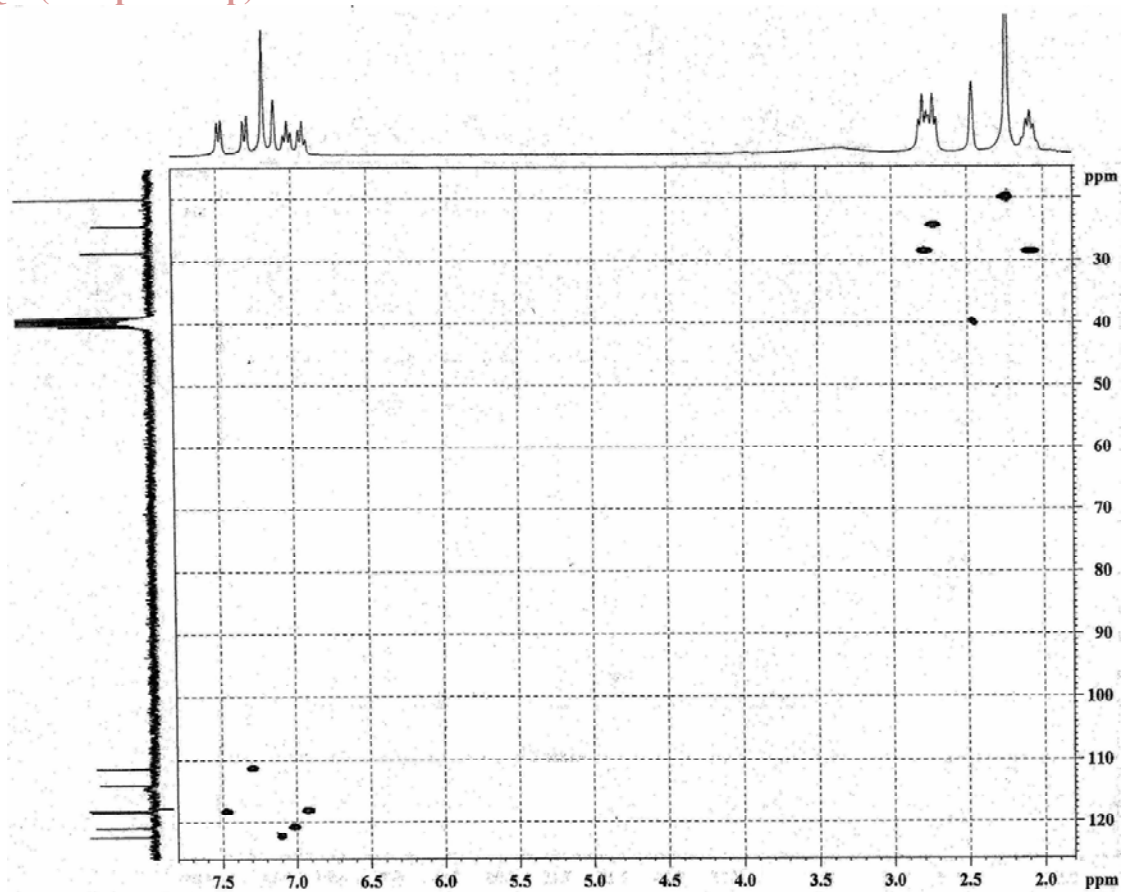

### HSQC expansion 1 (Compound 3p)

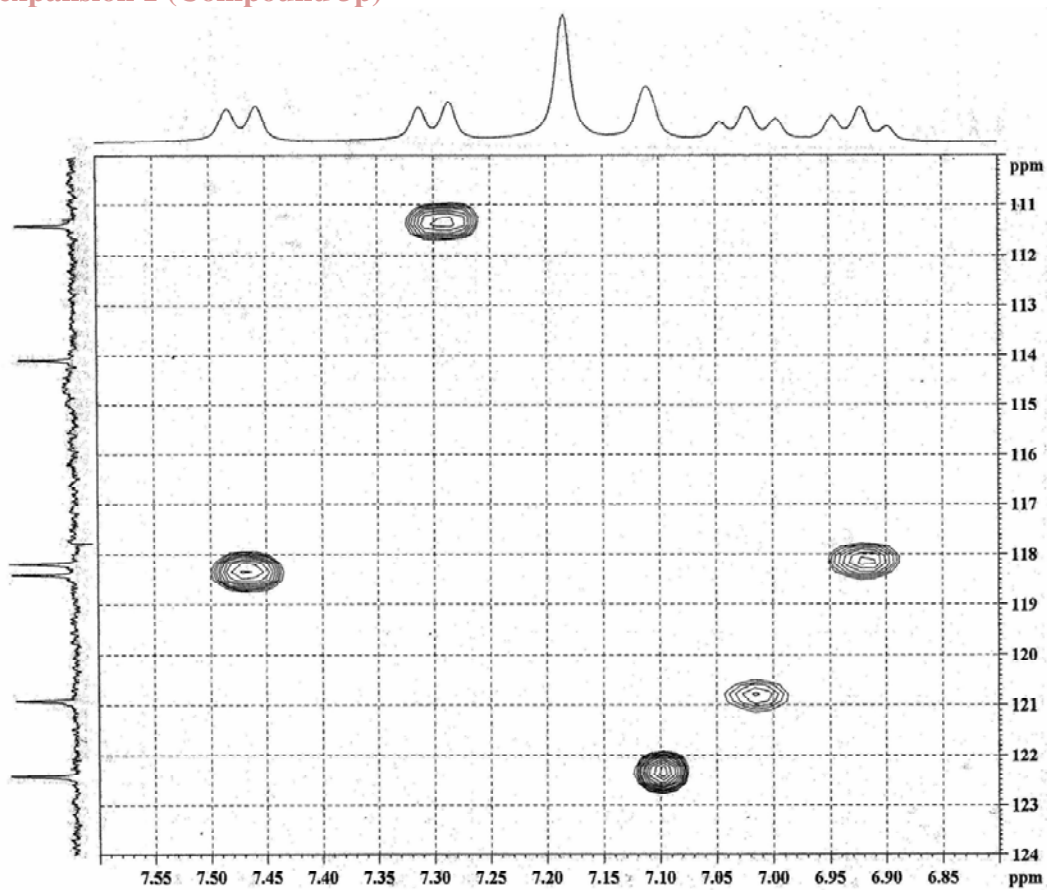

### HSQC expansion 2 (Compound 3p)

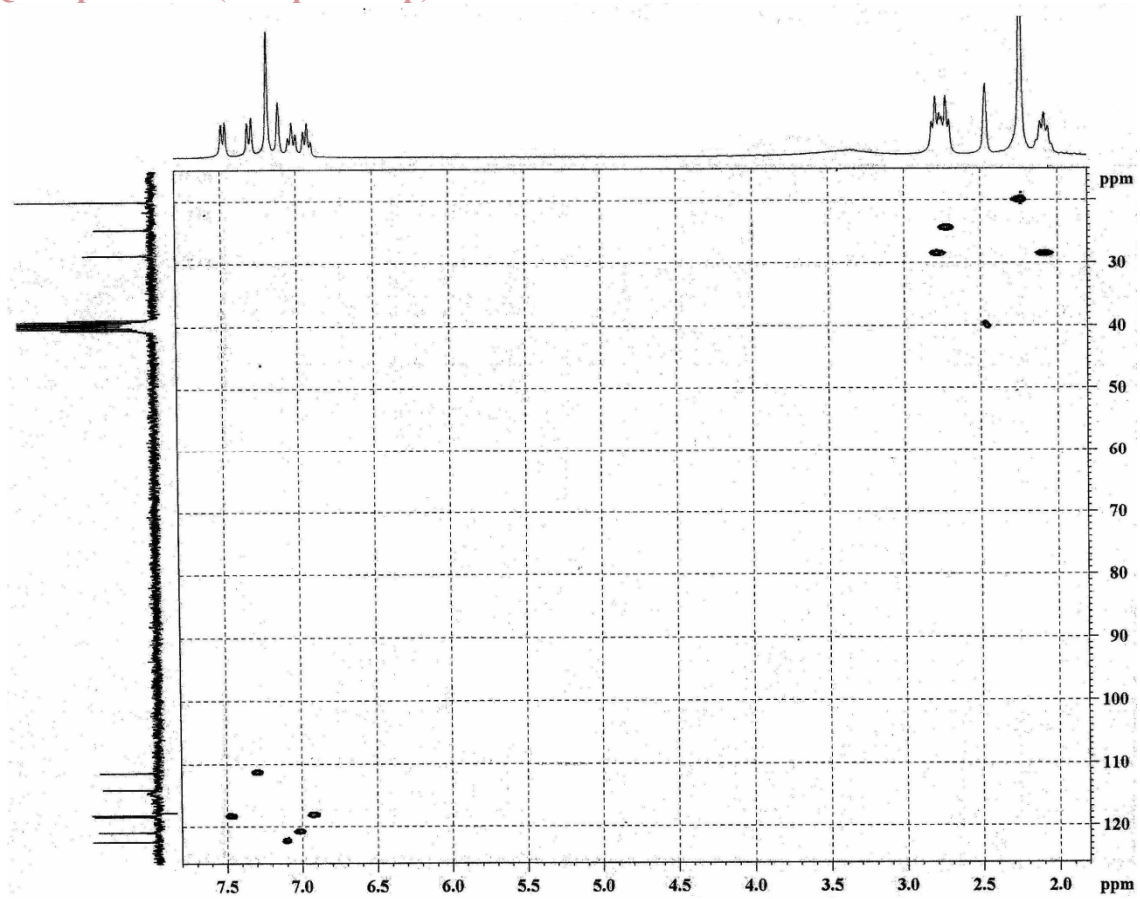



### HMBC (Compound 3p)

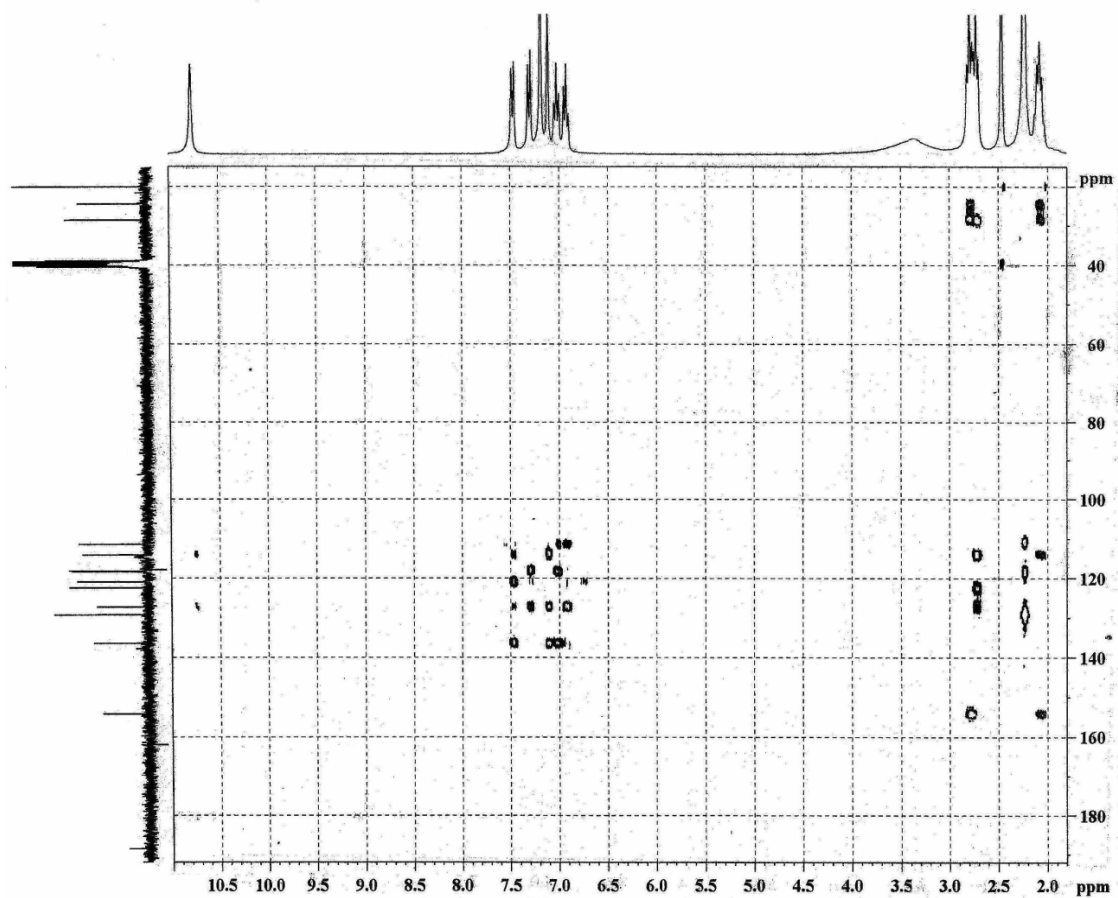

### HMBC expansion 1 (Compound 3p)

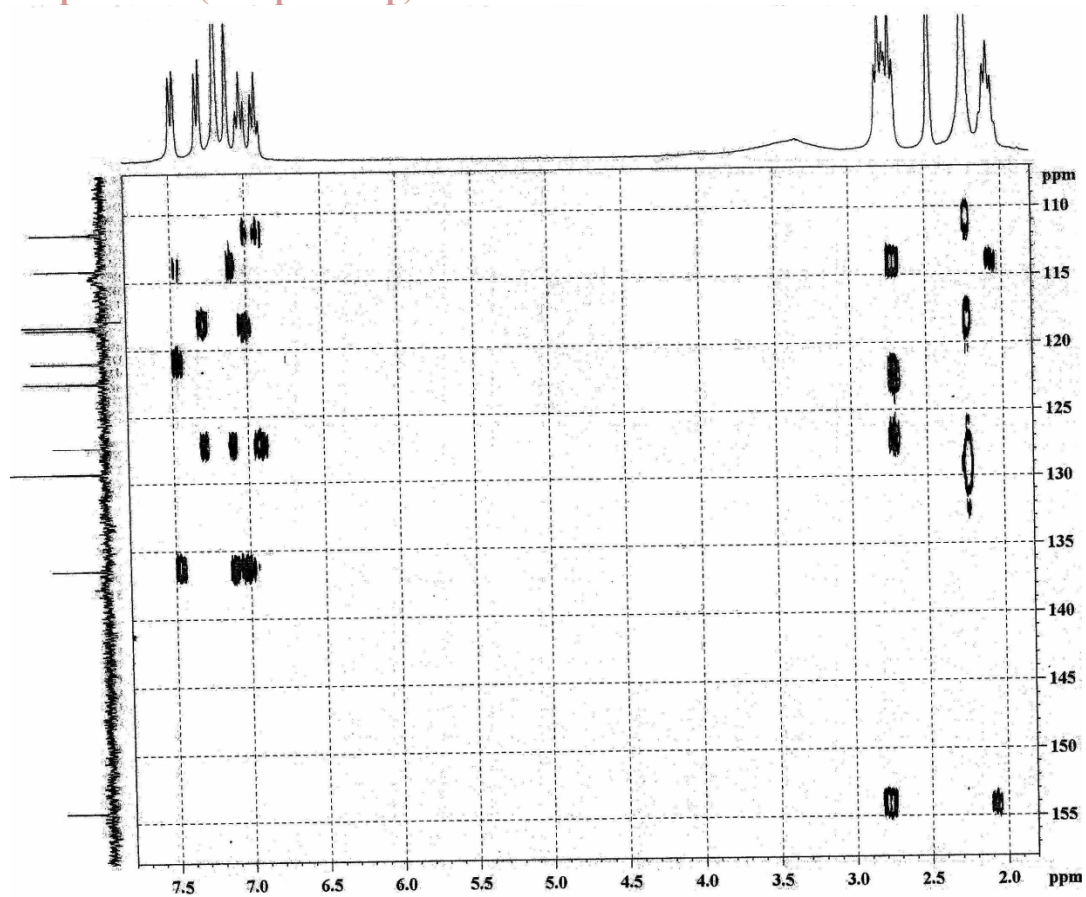

### HMBC expansion 2 (Compound 3p)

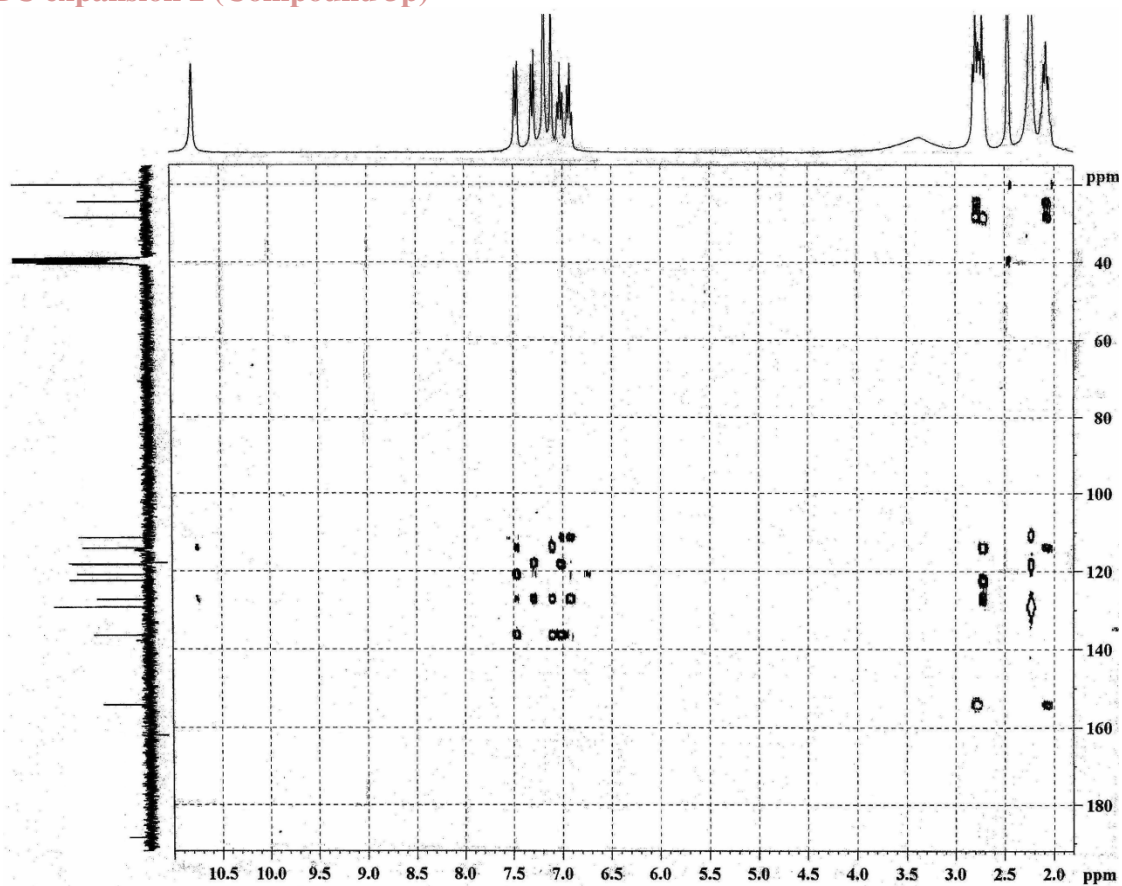

### NOESY (Compound 3p)

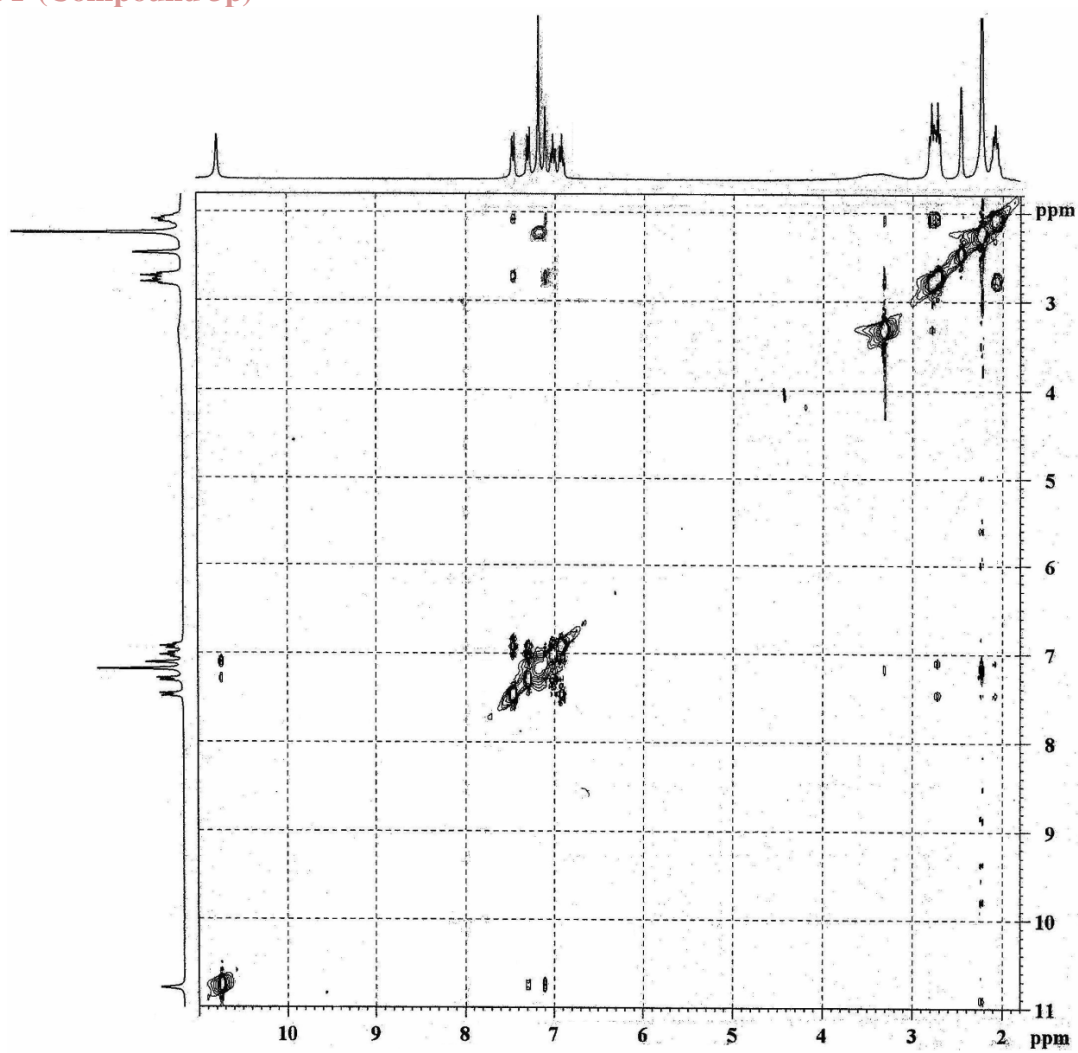

### NOESY expansion (Compound 3p)

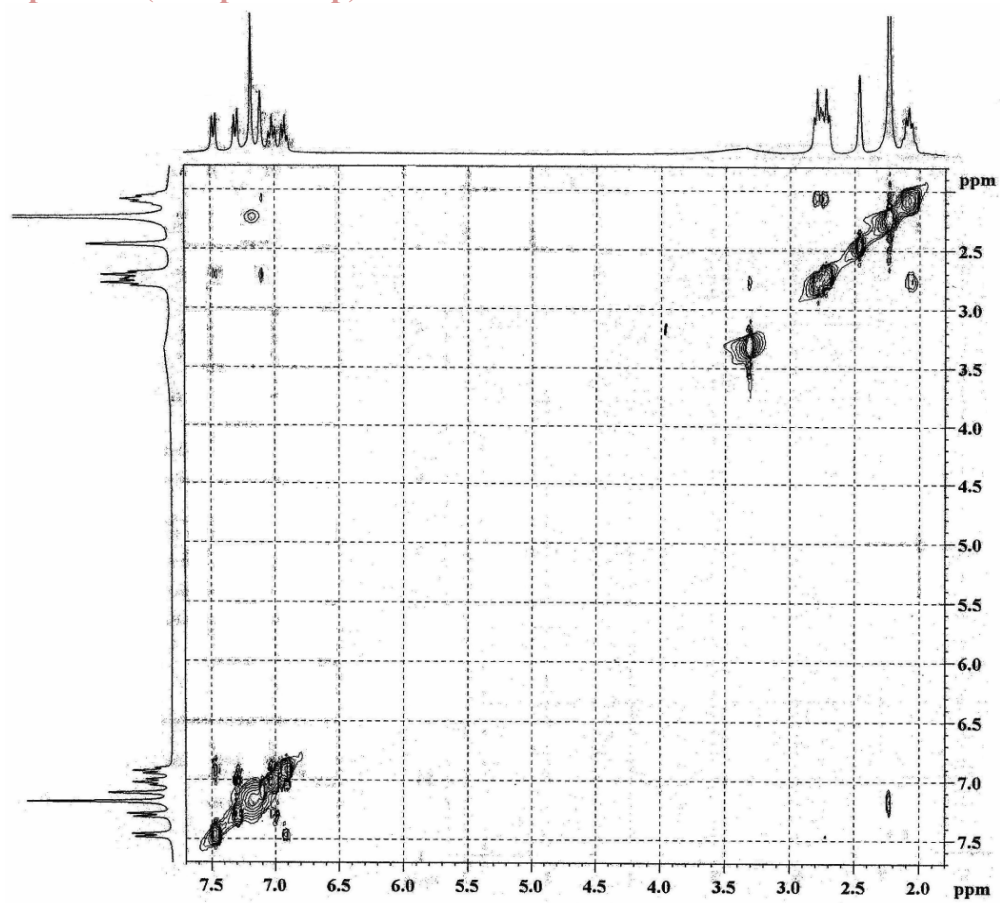

Supplement: c1ra00470k_3.pdf [file c1ra00470k_3.pdf]
