# Supplementary material for: Synthesis of 2-alkyl substituted benzimidazoles under microwave irradiation: Anti-proliferative effect of some representative compounds on human histiocytic lymphoma cell U937
Source: Royal Society of Chemistry journal article supplement (doi:10.1039/c1ra00470k), 2011-01-01

# Synthesis of 2-alkyl substituted benzimidazoles under microwave irradiation: Anti-proliferative effect of some representative compounds on human histiocytic lymphoma cell U937

Chhanda Mukhopadhyay,\*<sup>a</sup> Sabari Ghosh,<sup>a</sup> Sumita Sengupta (Bandyopadhyay)<sup>b</sup> and Soumasree De<sup>b</sup>

<sup>a</sup>Department of Chemistry, University of Calcutta, 92 APC Road, Kolkata-700009, India; Tel: +91 9433019610; E-mail: cmukhop@yahoo.co.in

<sup>b</sup> Department of Biophysics, Molecular Biology and Bioinformatics, University of Calcutta, 92 APC Road, Kolkata-700009, India

## Supplementary Information

### Part 4

#### Copy of NMR spectra for compounds 3a – 3i.

##### Compound 3a

##### <sup>1</sup>H-NMR

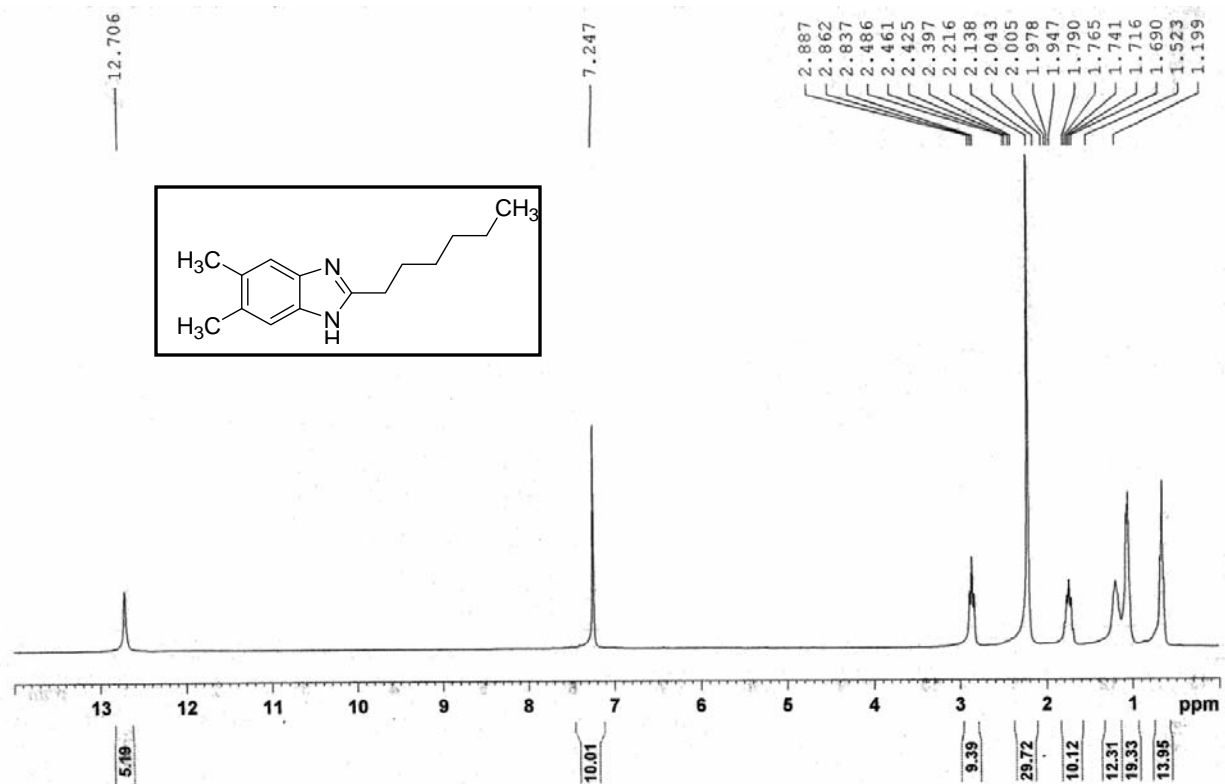

<sup>13</sup>C-NMR (Compound **3a**)

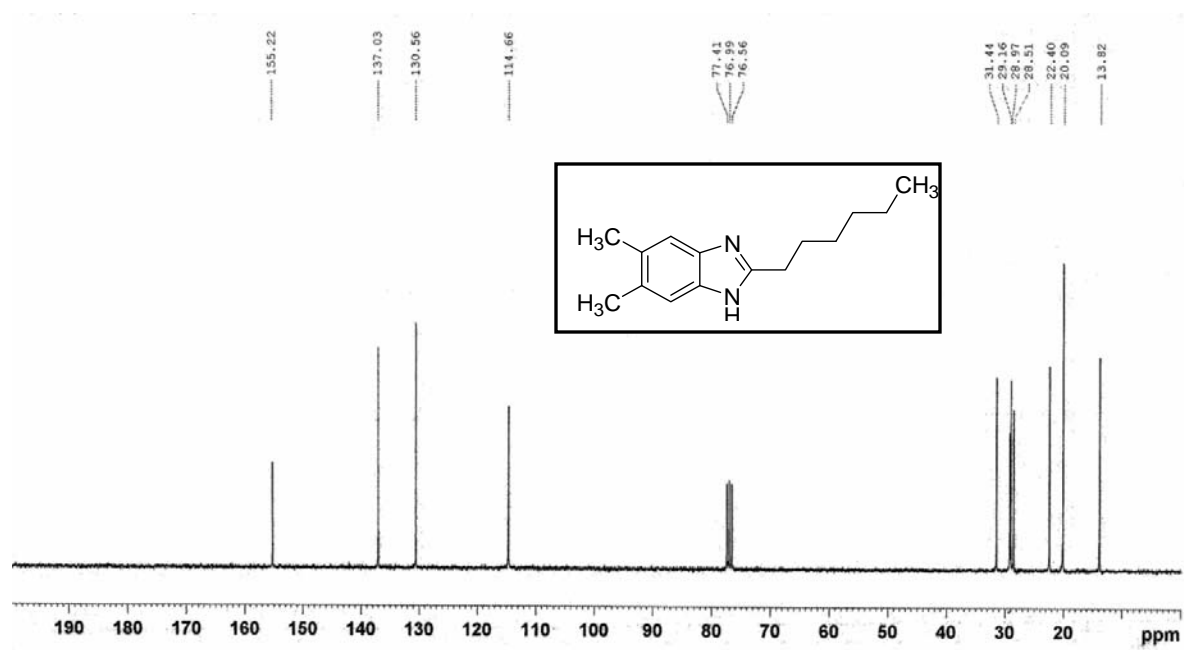

DEPT-135 (Compound **3a**)

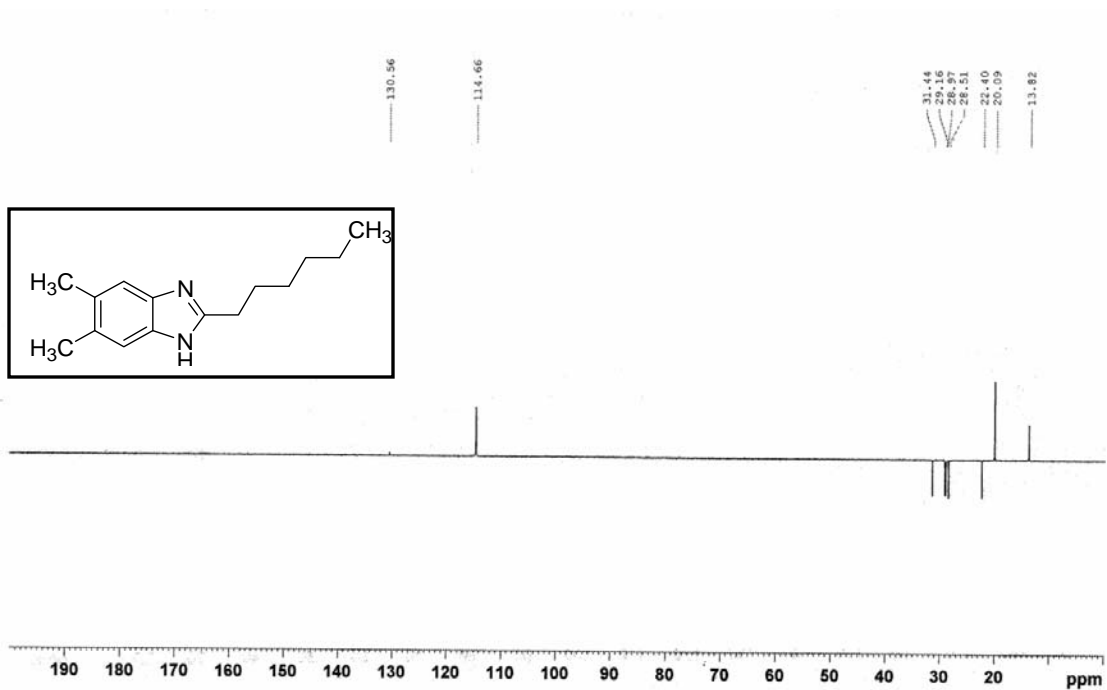

Compound 3b

<sup>1</sup>H-NMR

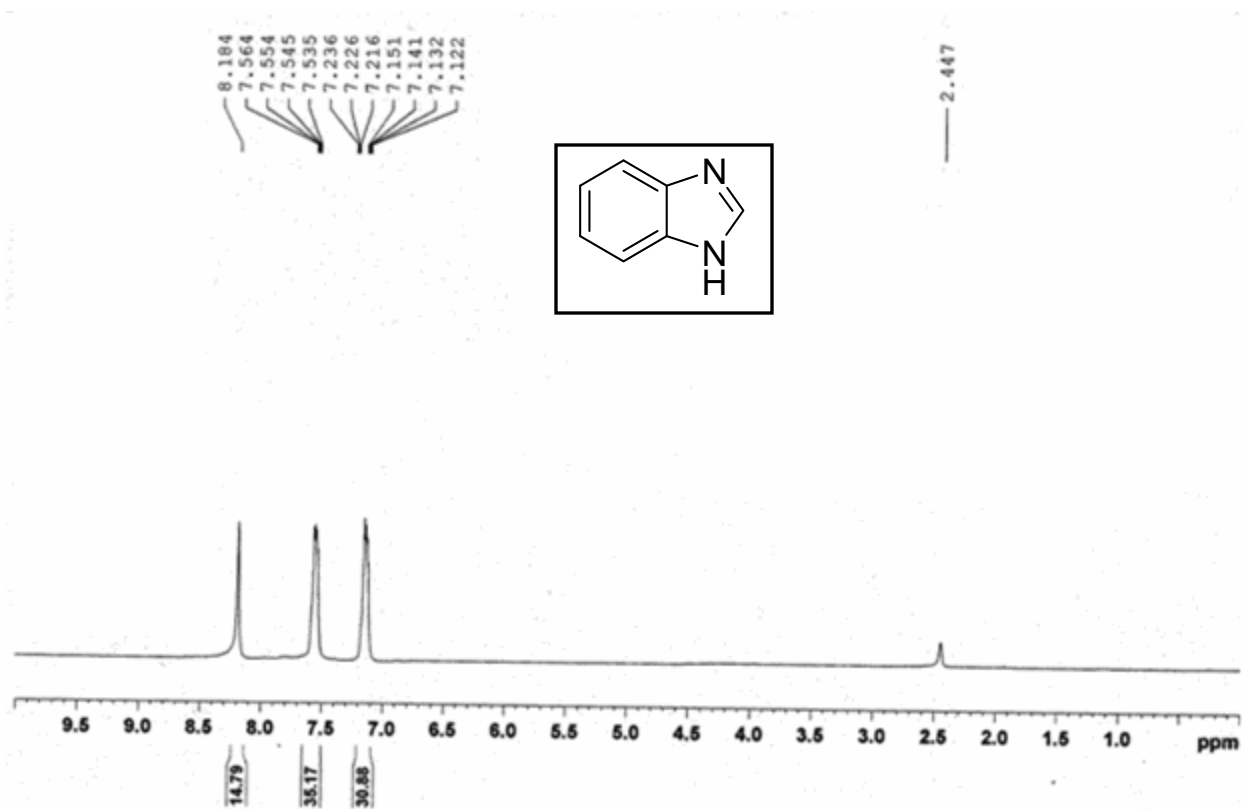

$^{13}\text{C}$ -NMR (Compound **3b**)

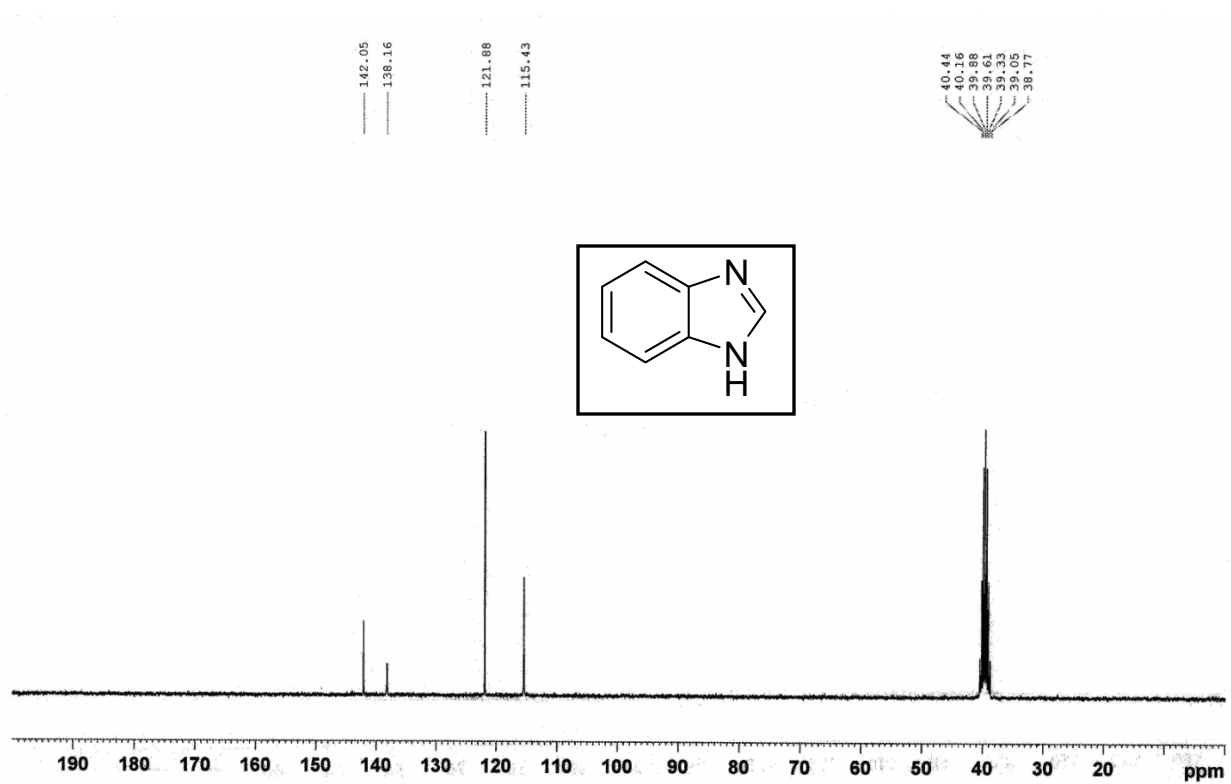

DEPT-135 (Compound **3b**)

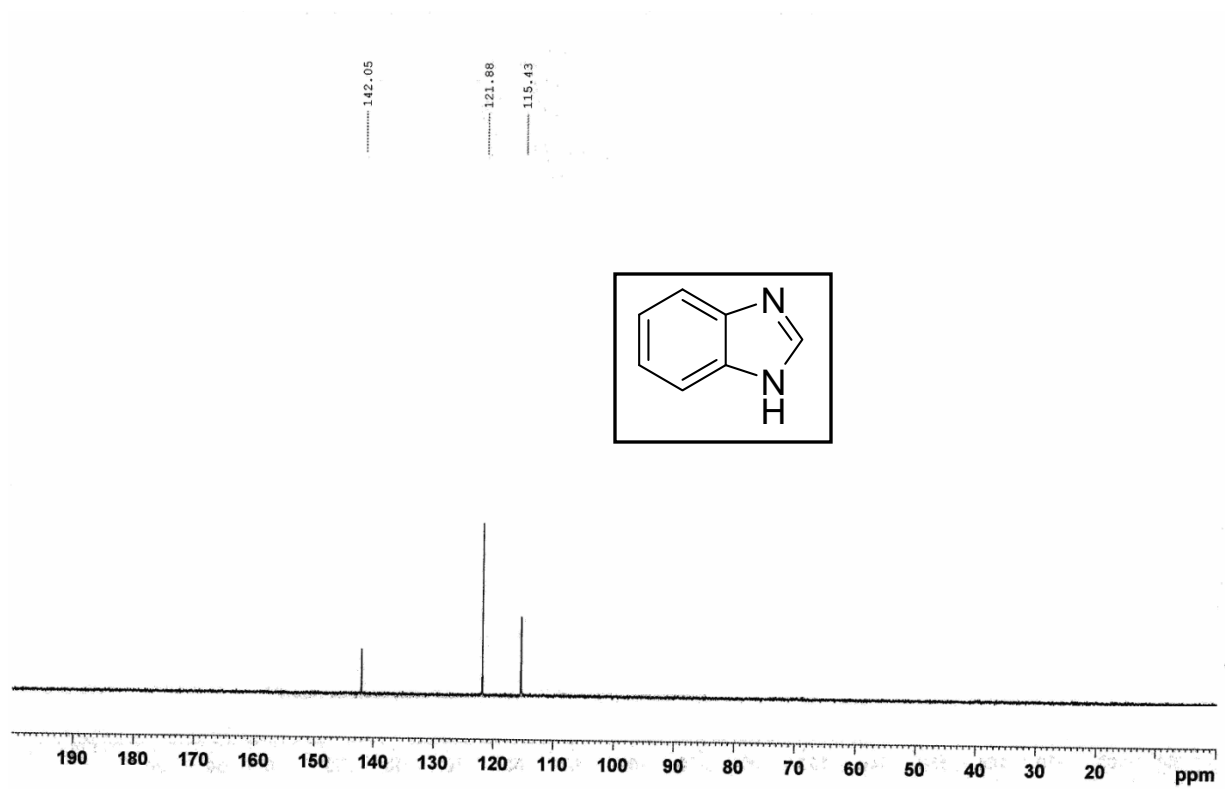

**Compound 3c**

**<sup>1</sup>H-NMR**

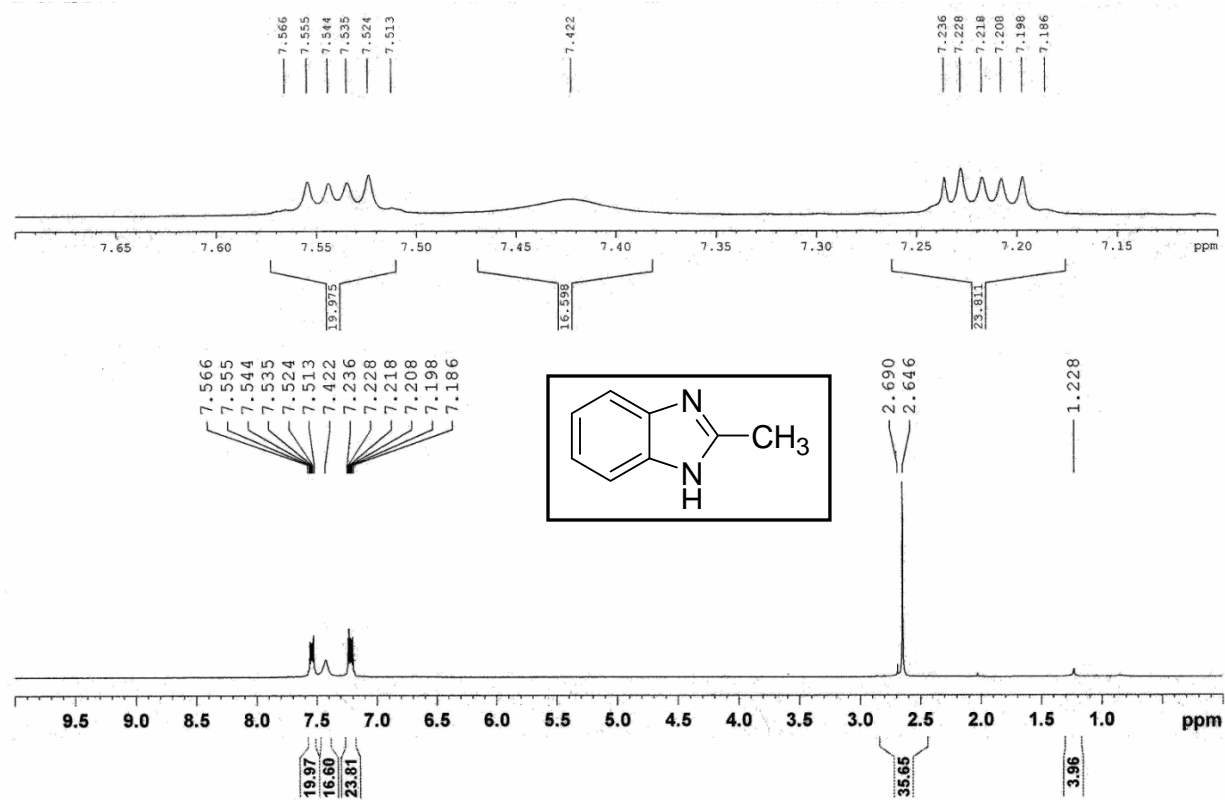

$^{13}\text{C}$ -NMR (Compound **3c**)

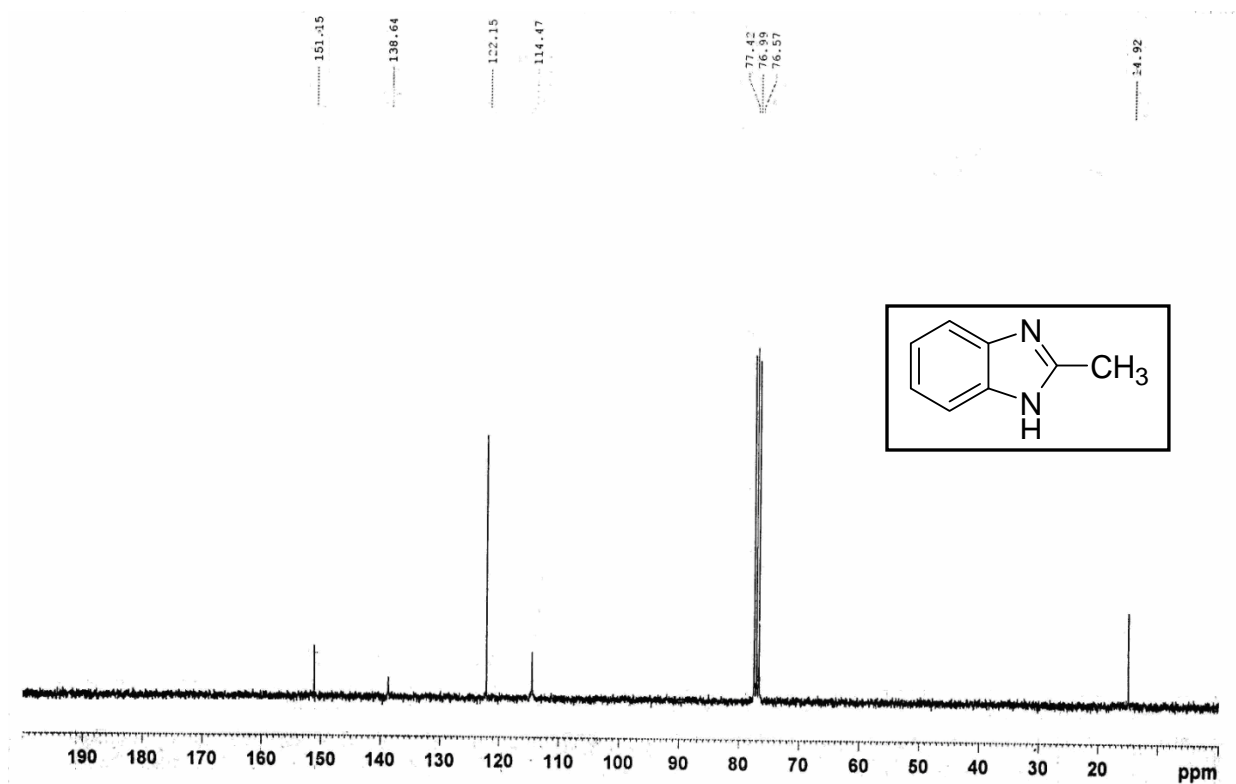

**Compound 3d**

**<sup>1</sup>H-NMR**

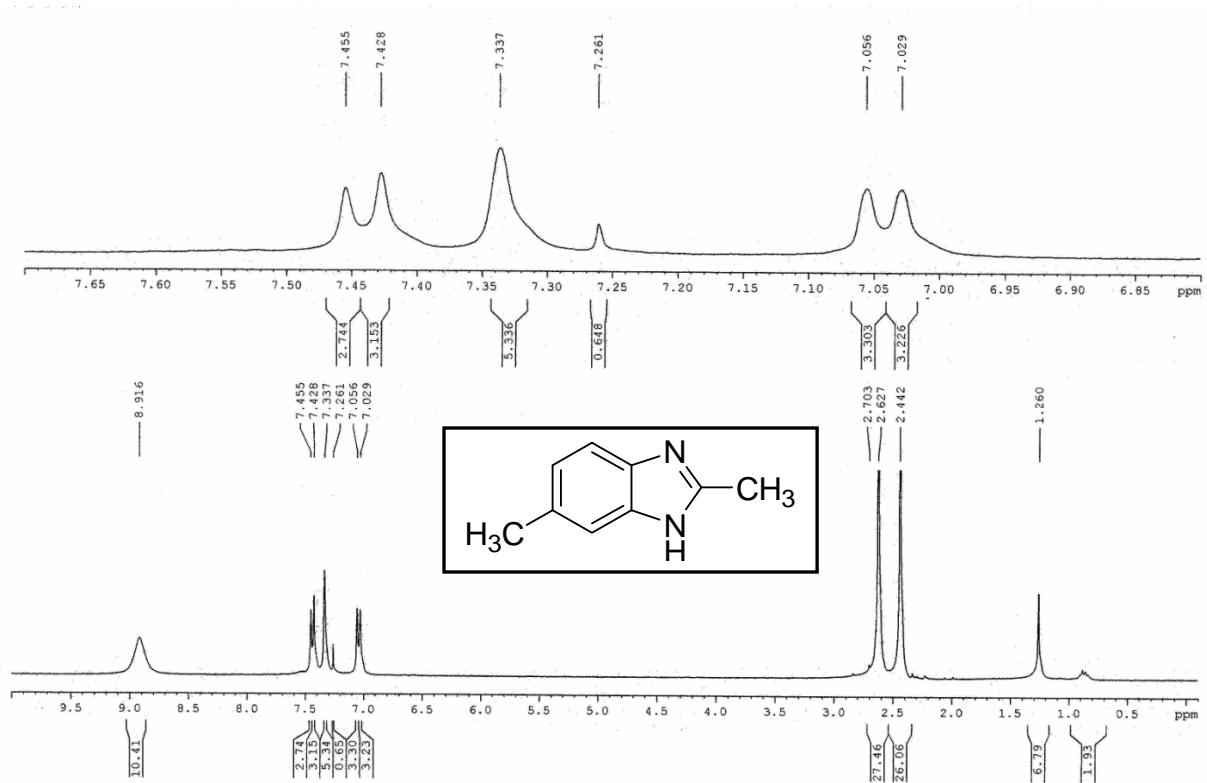



$^{13}\text{C}$ -NMR (Compound **3d**)

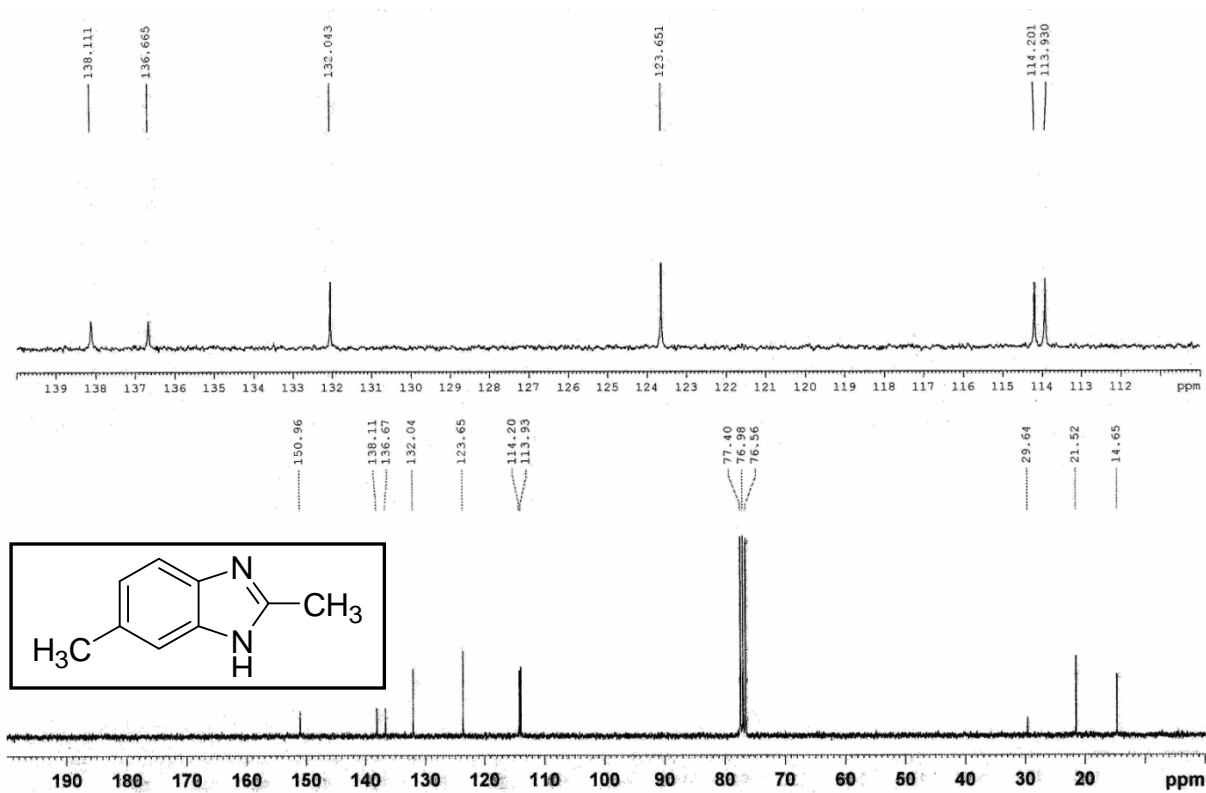

DEPT-135 (Compound **3d**)

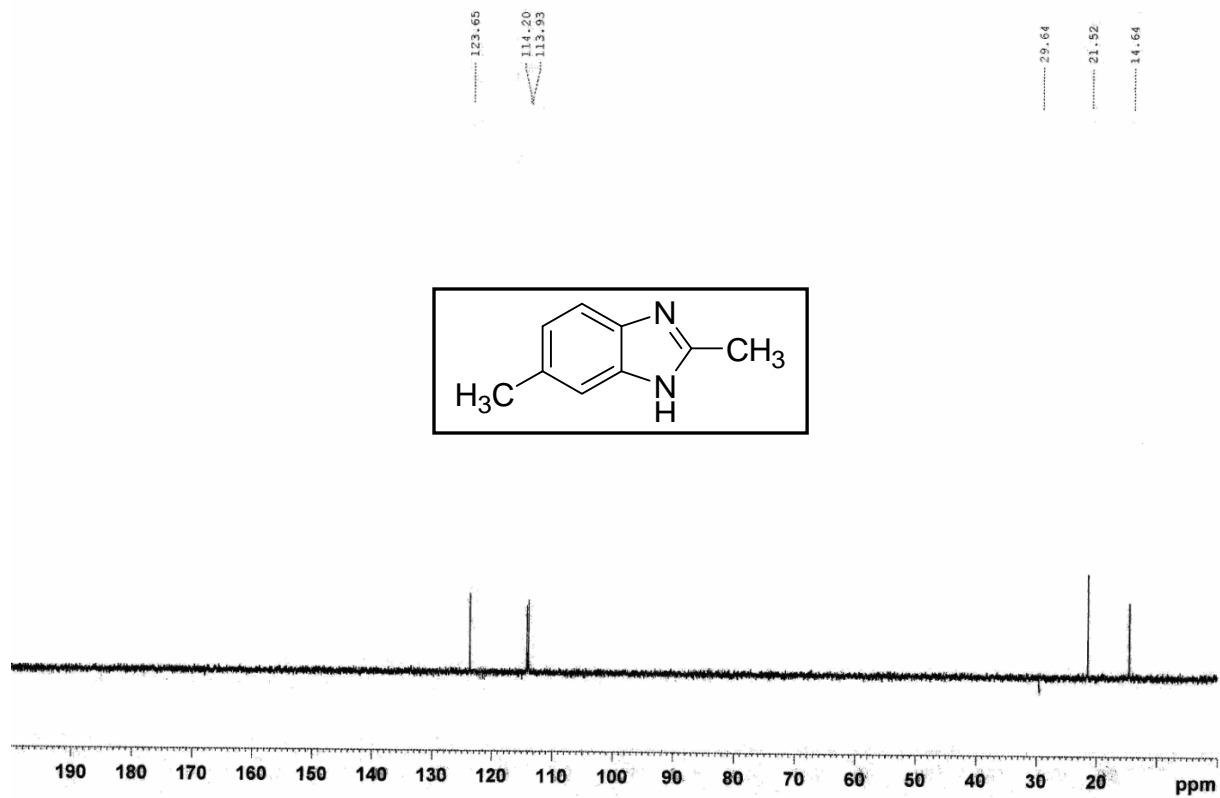

**Compound 3e**

<sup>1</sup>H-NMR

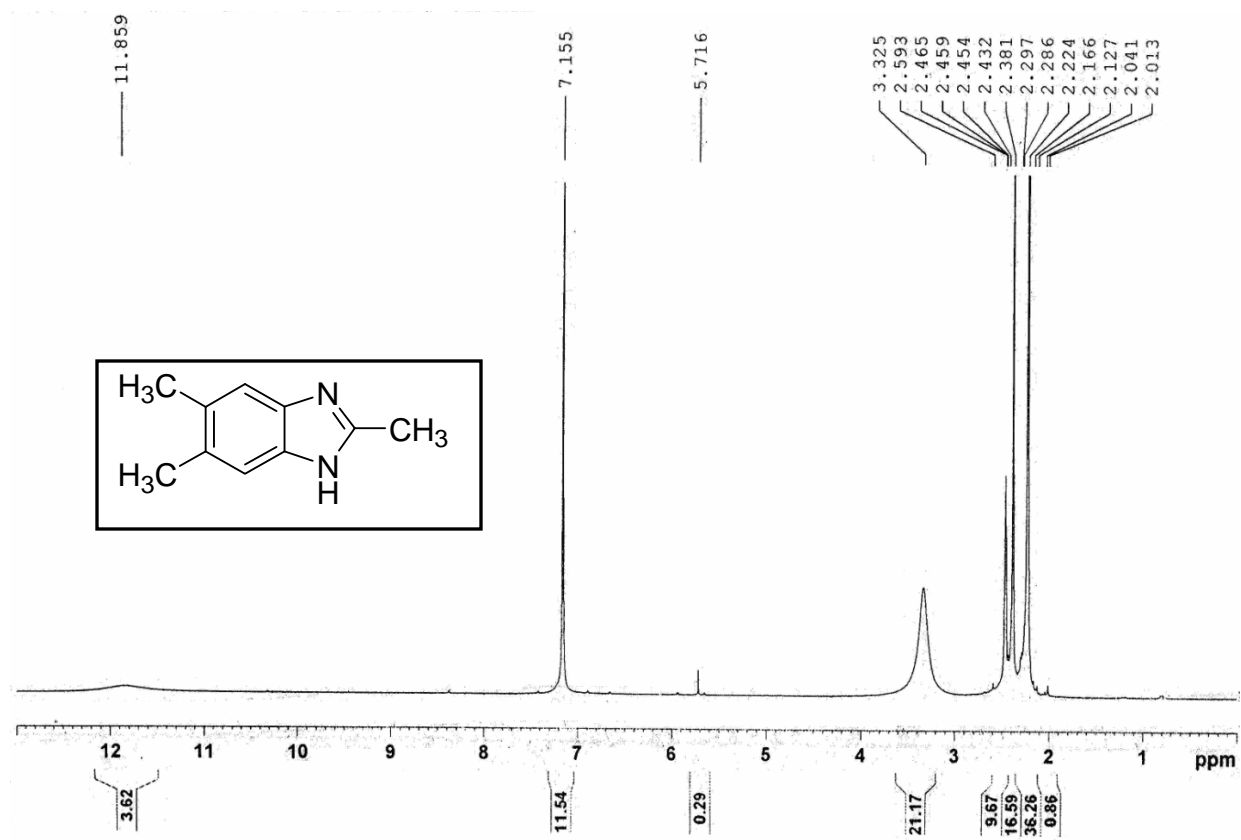

<sup>13</sup>C-NMR (Compound **3e**)

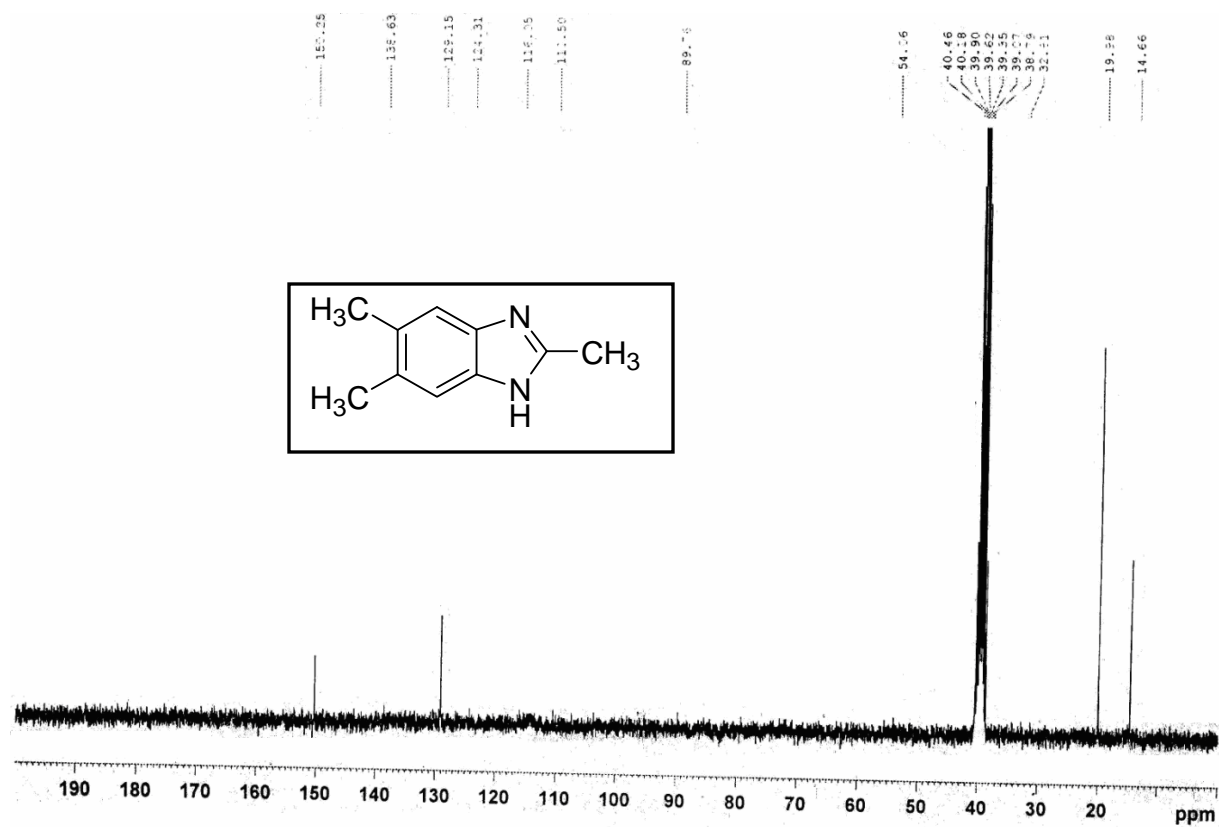

DEPT-135 (Compound **3e**)

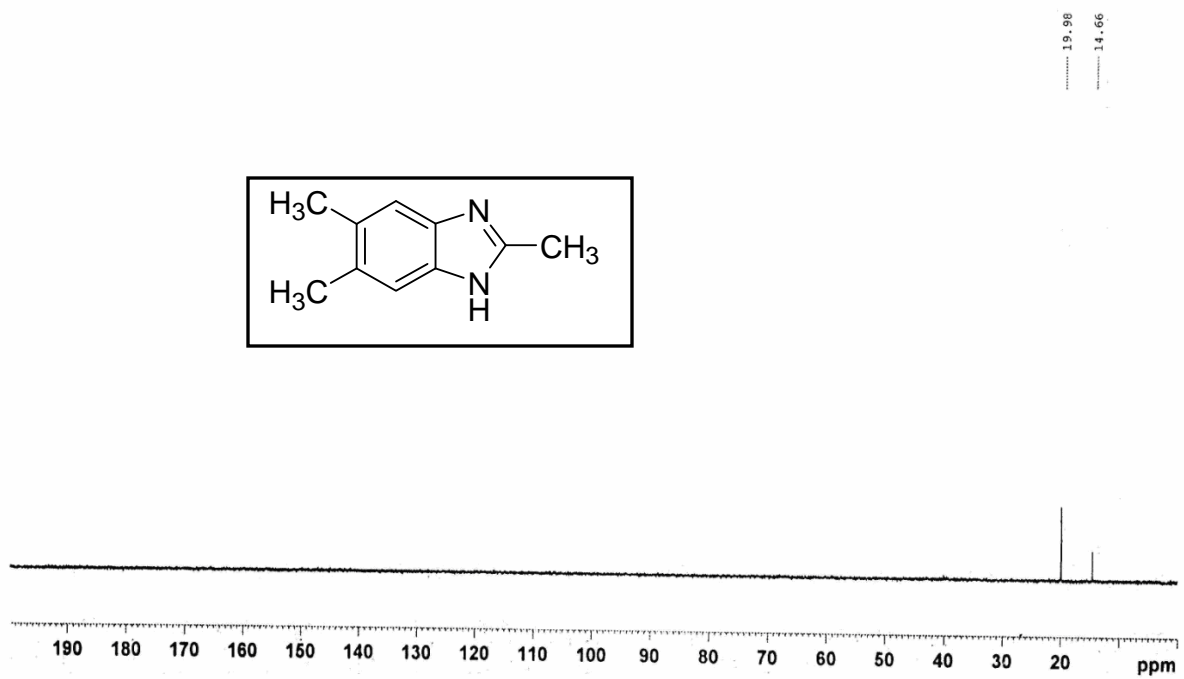

**Compound 3f**

<sup>1</sup>H-NMR

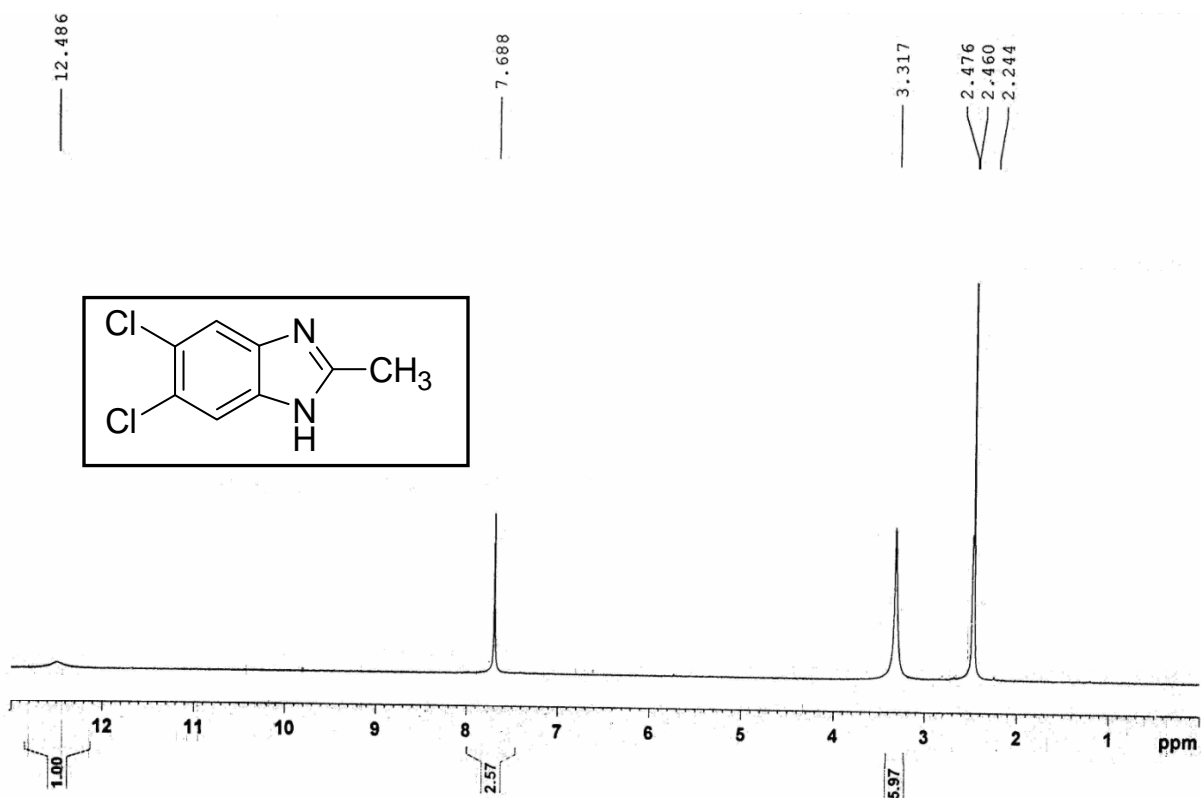

$^{13}\text{C}$ -NMR (Compound **3f**)

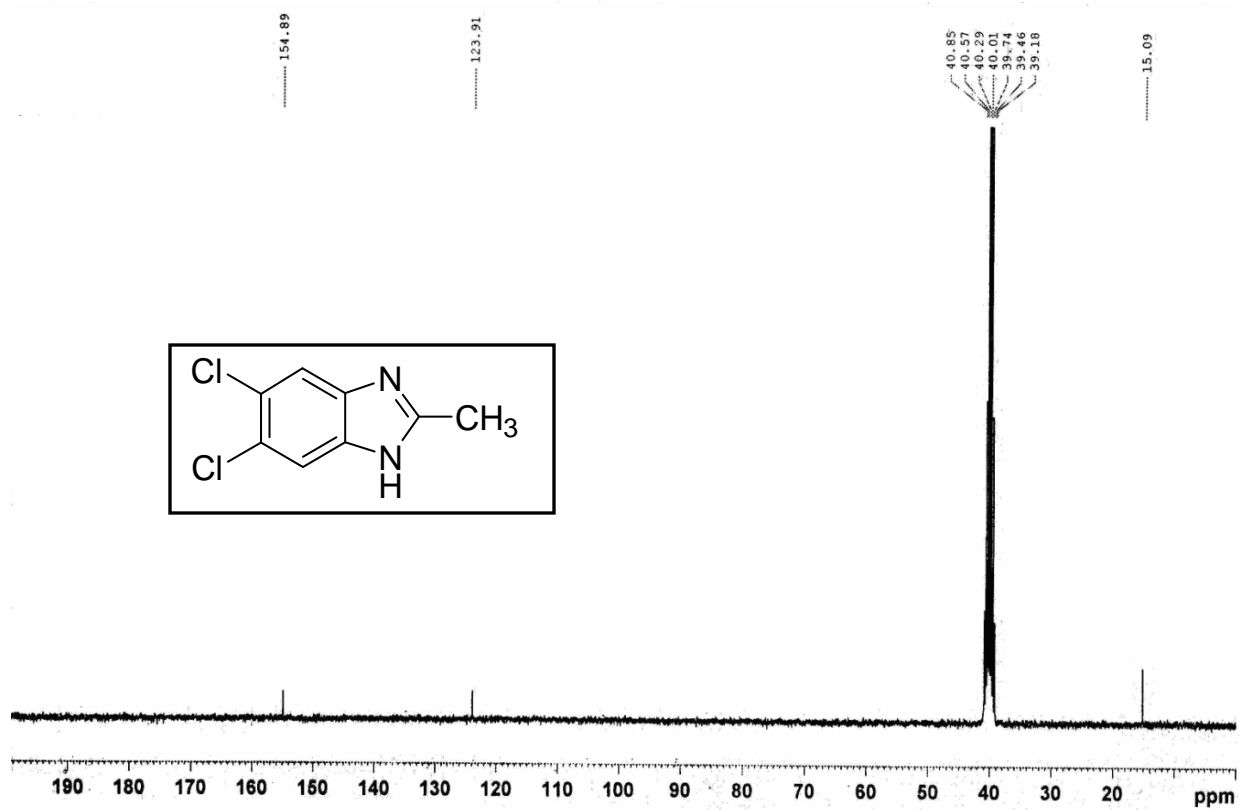

### Compound **3g**

### <sup>1</sup>H-NMR

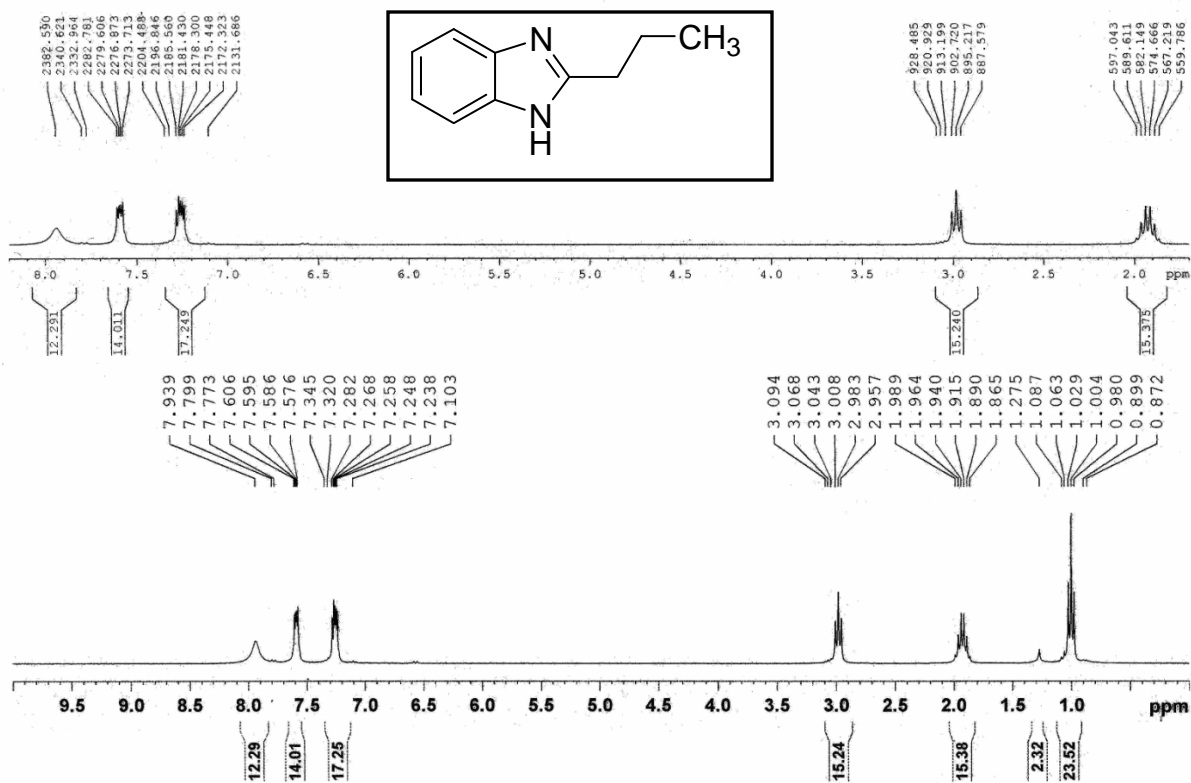



$^{13}\text{C}$ -NMR (Compound **3g**)

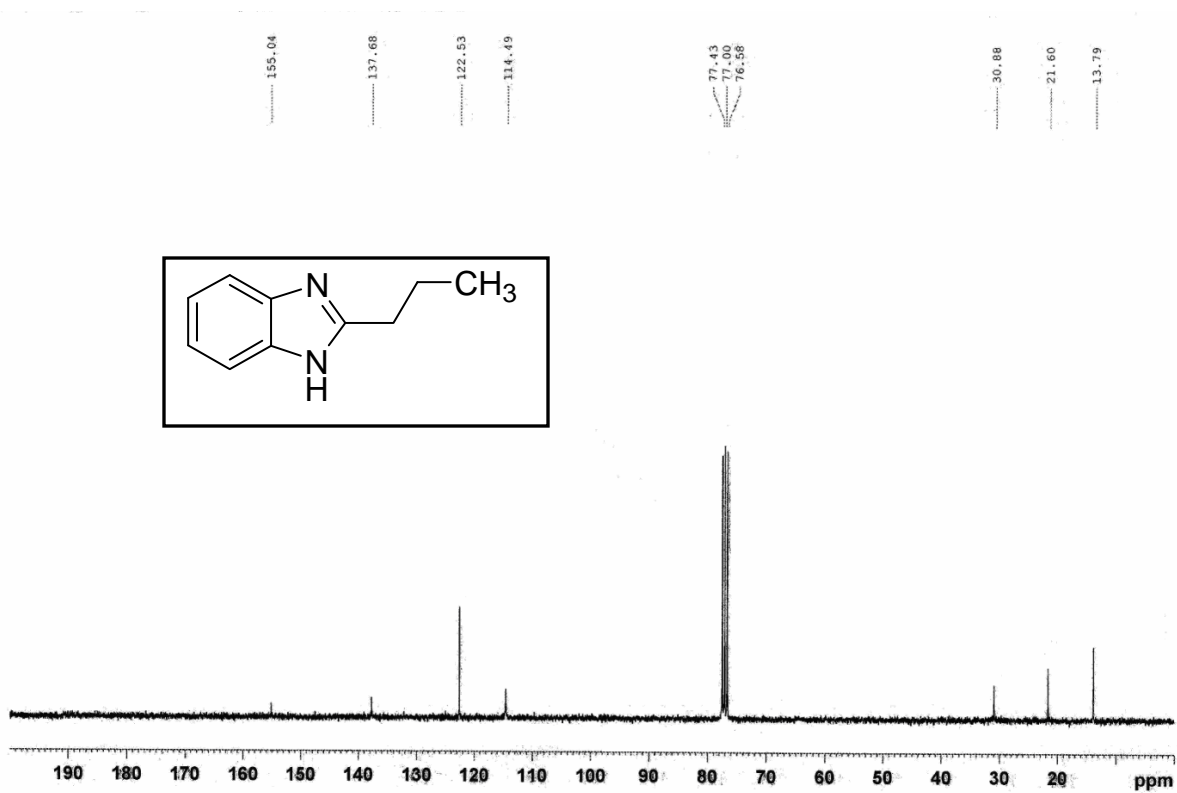

DEPT-135 (Compound **3g**)

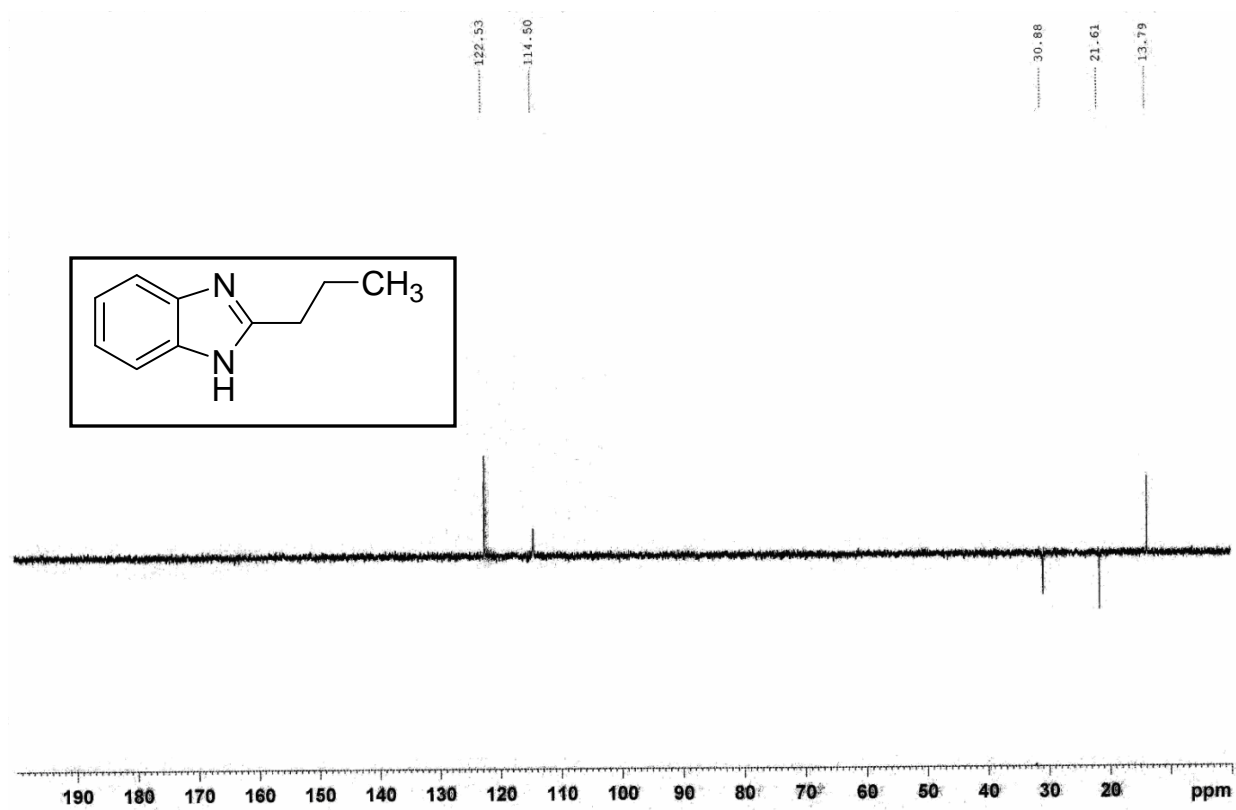

### Compound 3h

### <sup>1</sup>H-NMR

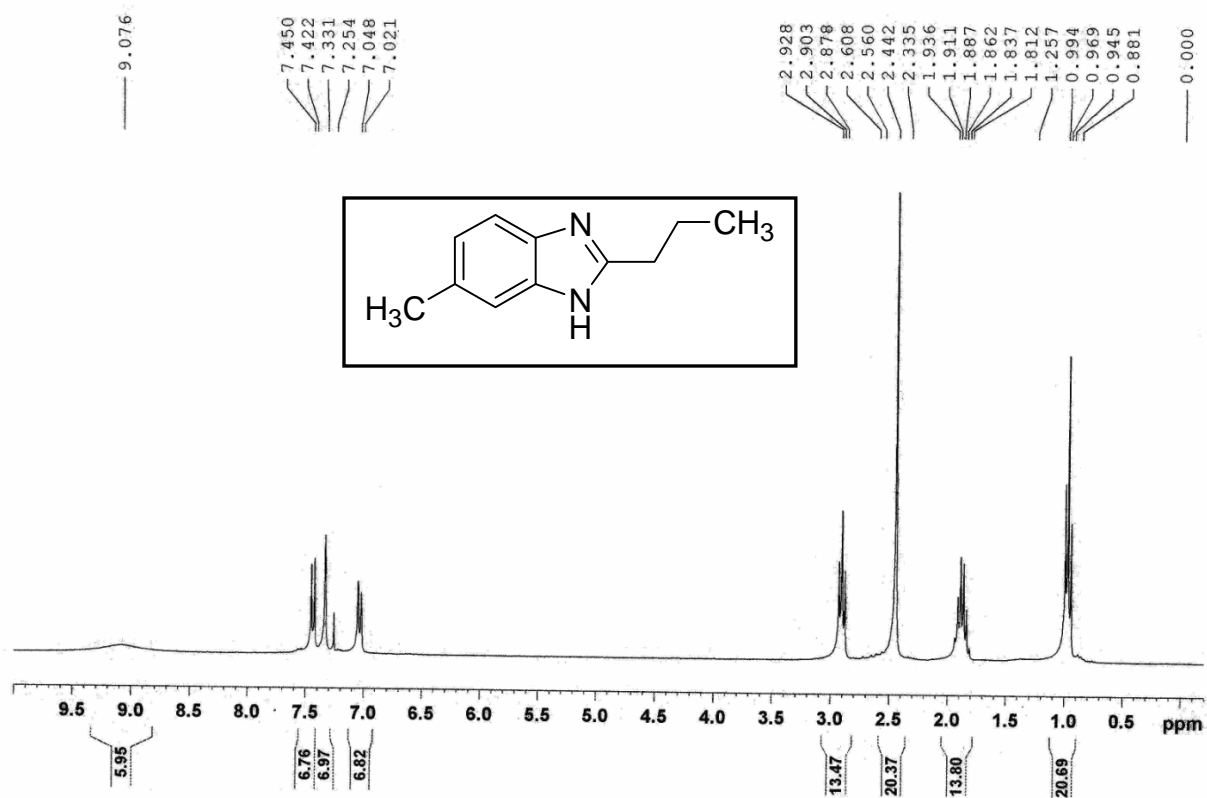

$^{13}\text{C}$ -NMR (Compound **3h**)

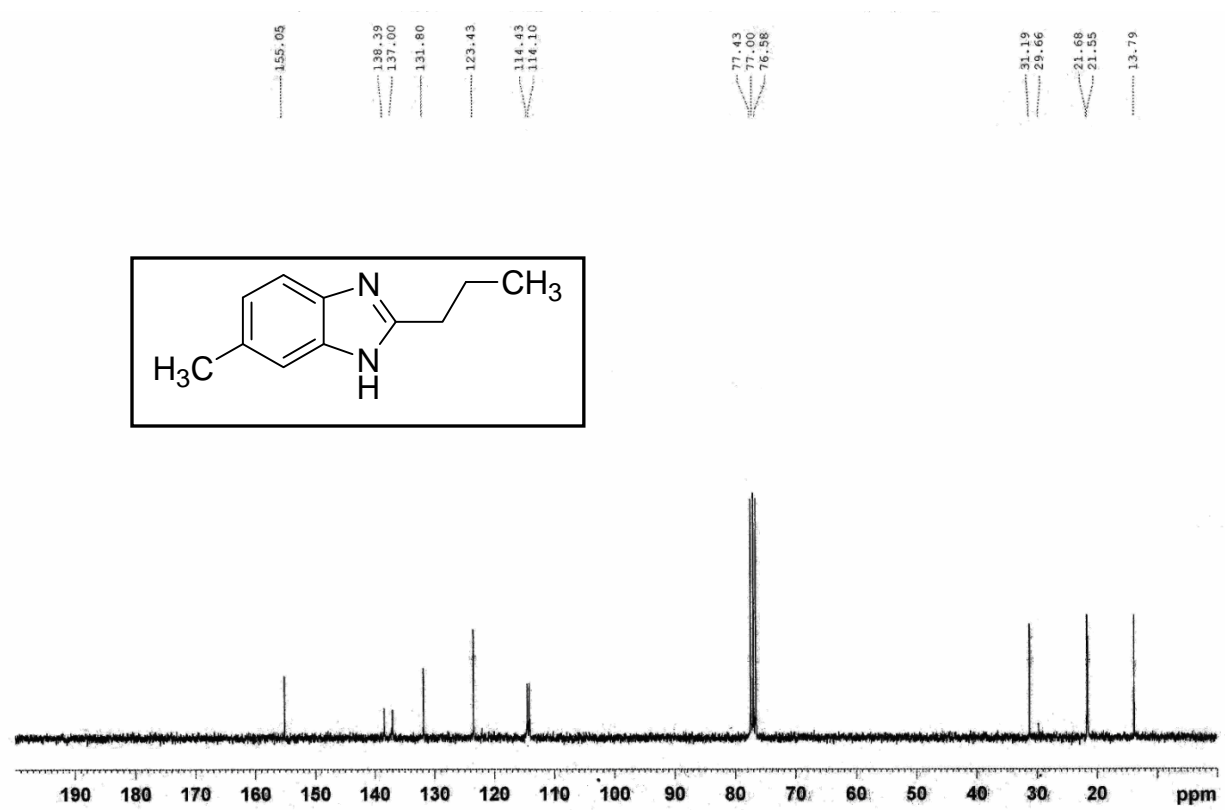

DEPT-135 (Compound **3h**)

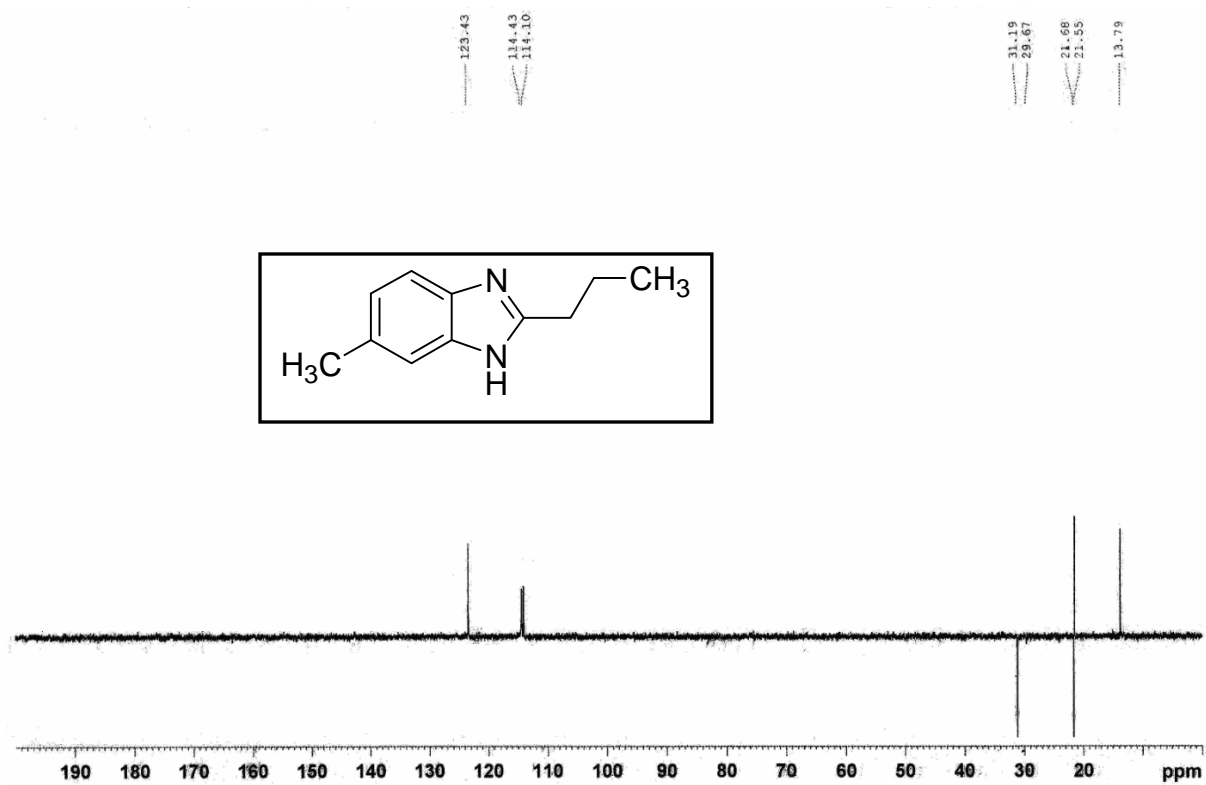

**Compound 3i**

<sup>1</sup>H-NMR

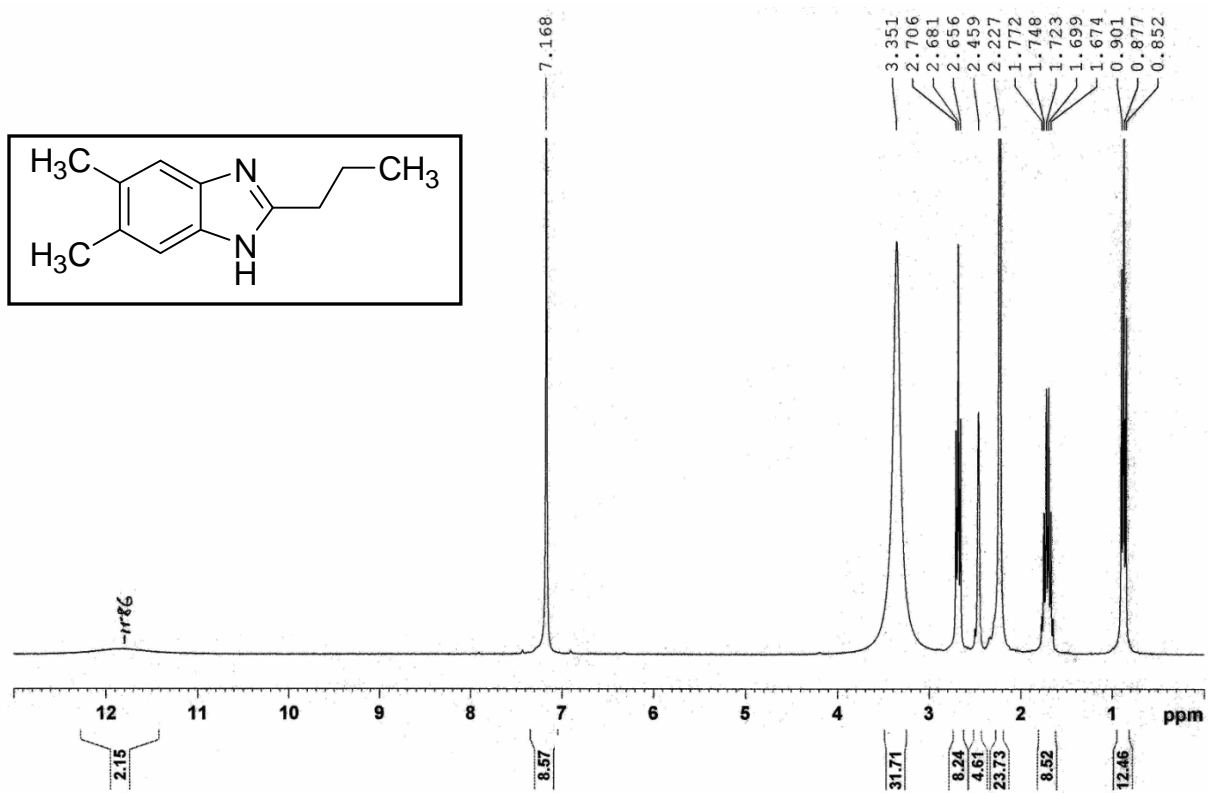

$^{13}\text{C}$ -NMR (Compound **3i**)

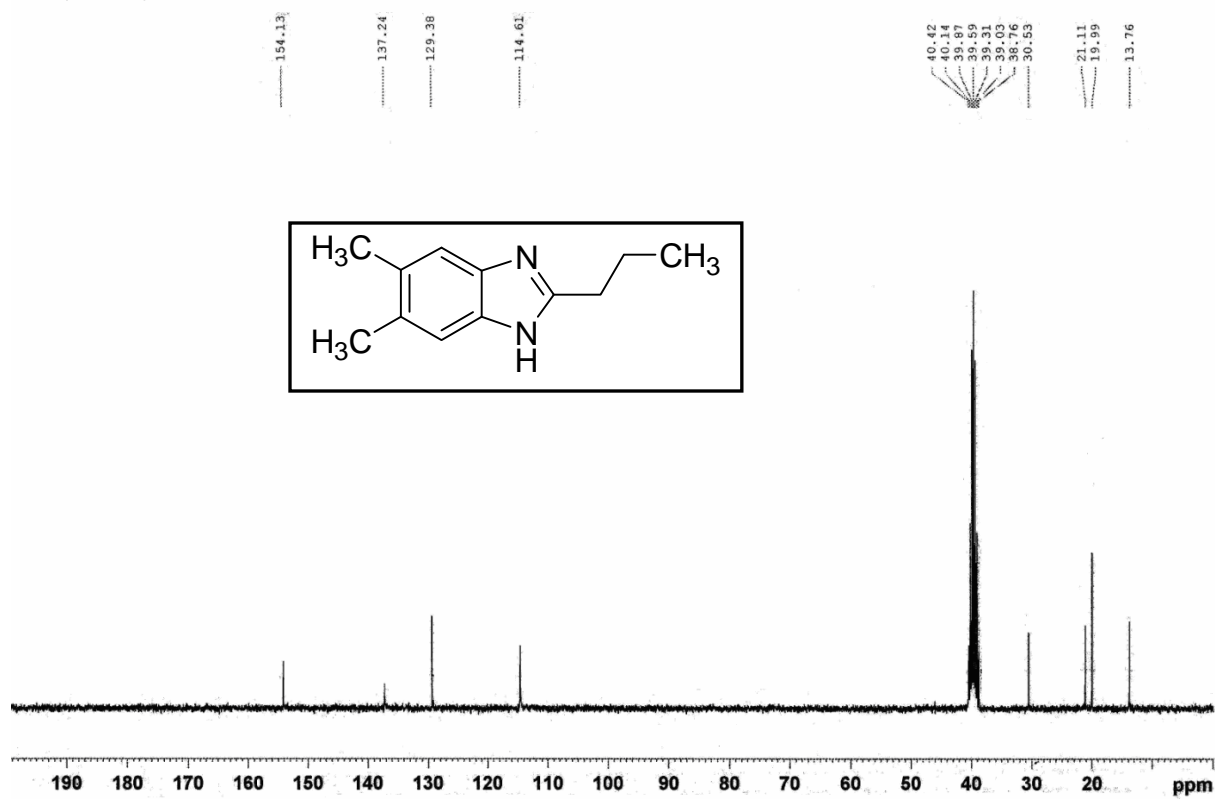

DEPT-135 (Compound **3i**)

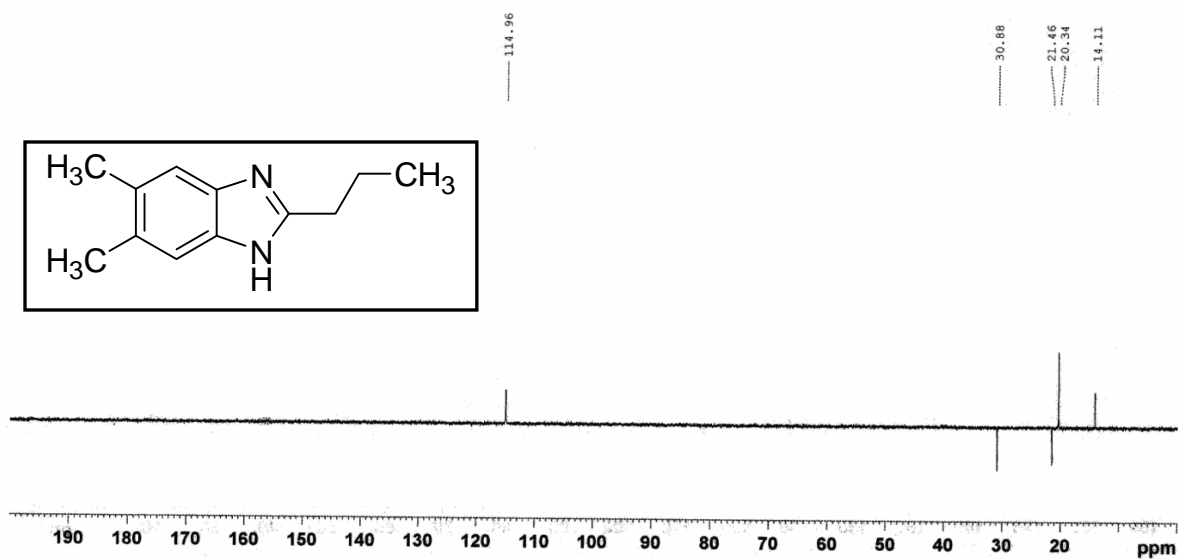

Supplement: c1ra00470k_4.pdf [file c1ra00470k_4.pdf]
