# Supplementary material for: Synthesis of 2-alkyl substituted benzimidazoles under microwave irradiation: Anti-proliferative effect of some representative compounds on human histiocytic lymphoma cell U937
Source: Royal Society of Chemistry journal article supplement (doi:10.1039/c1ra00470k), 2011-01-01

# Synthesis of 2-alkyl substituted benzimidazoles under microwave irradiation: Anti-proliferative effect of some representative compounds on human histiocytic lymphoma cell U937

Chhanda Mukhopadhyay,<sup>\*a</sup> Sabari Ghosh,<sup>a</sup> Sumita Sengupta (Bandyopadhyay)<sup>b</sup> and Soumasree De<sup>b</sup>

<sup>a</sup>Department of Chemistry, University of Calcutta, 92 APC Road, Kolkata-700009, India; Tel: +91 9433019610; E-mail: cmukhop@yahoo.co.in

<sup>b</sup> Department of Biophysics, Molecular Biology and Bioinformatics, University of Calcutta, 92 APC Road, Kolkata-700009, India

## Supplementary Information

### Part 5

#### Copy of NMR spectra for compounds 3j – 3r.

##### Compound 3j

##### <sup>1</sup>H-NMR

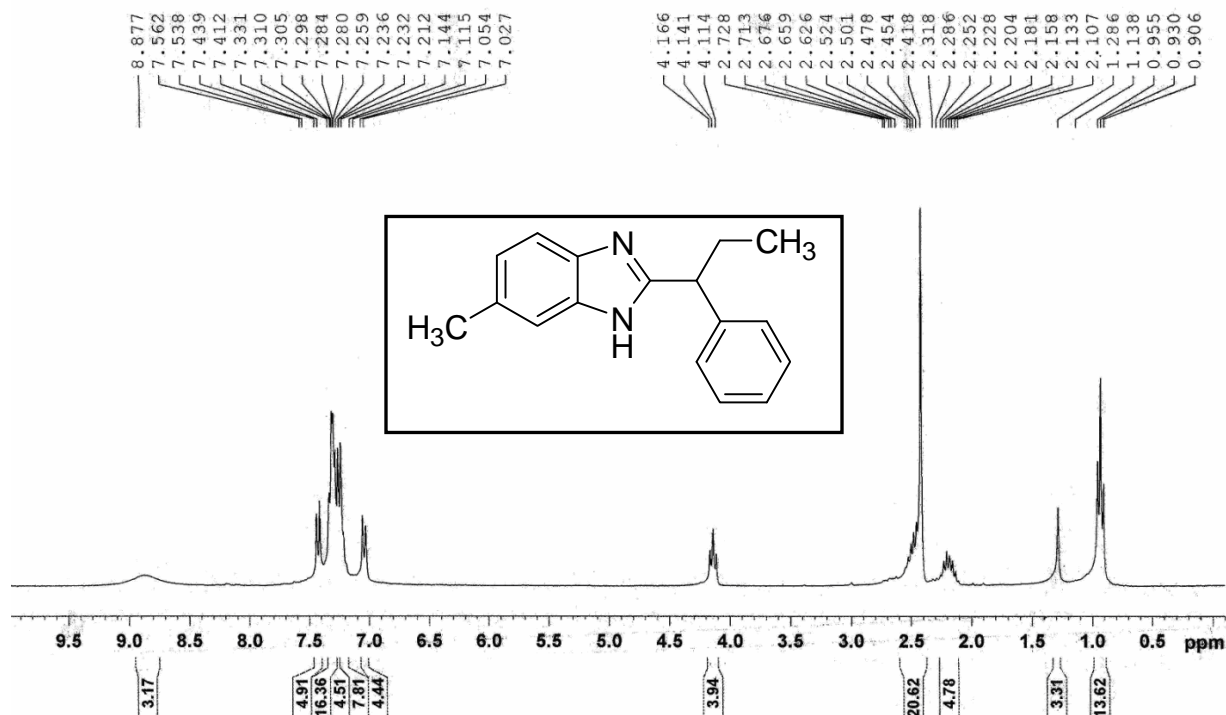

<sup>13</sup>C-NMR (Compound **3j**)

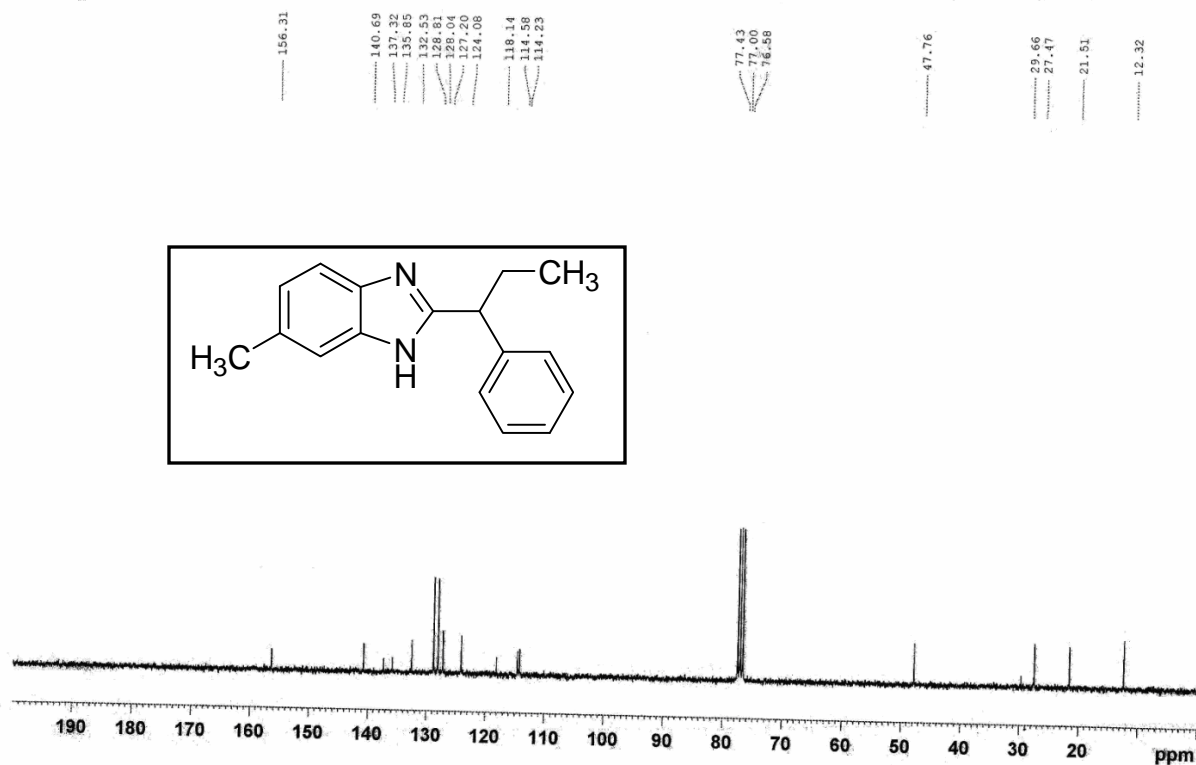

DEPT-135 (Compound **3j**)

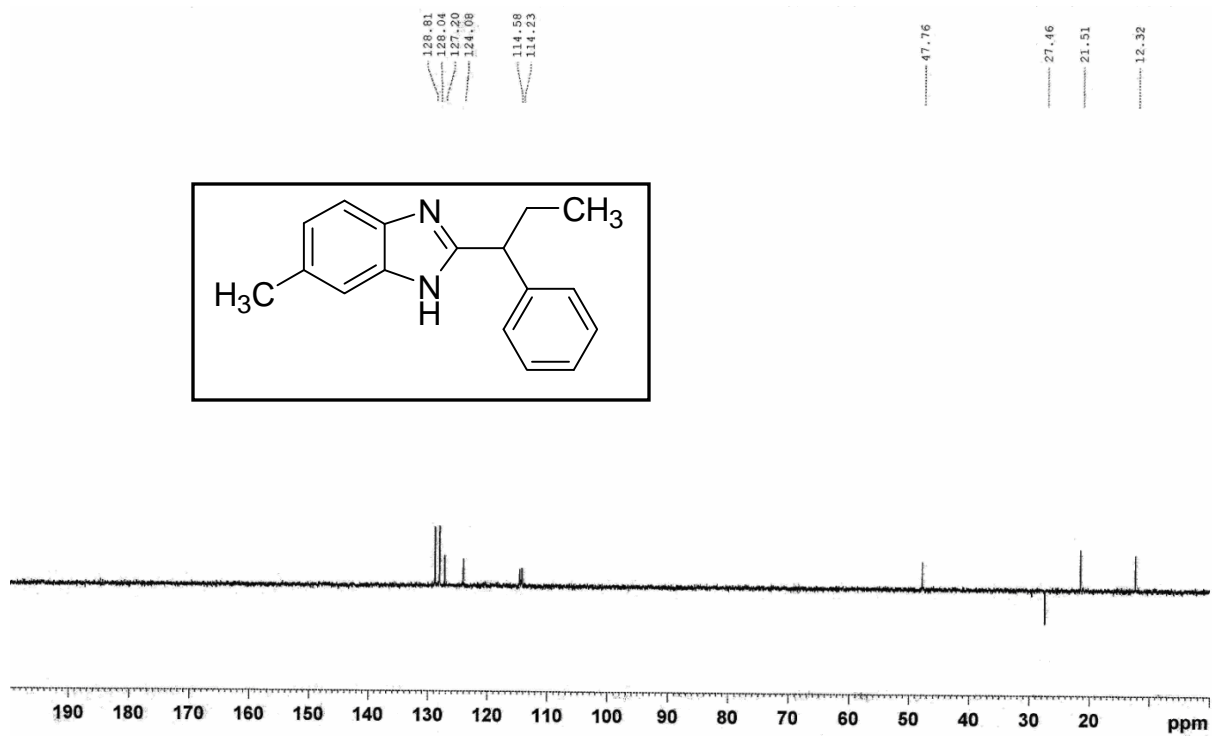

**Compound 3k**

<sup>1</sup>H-NMR

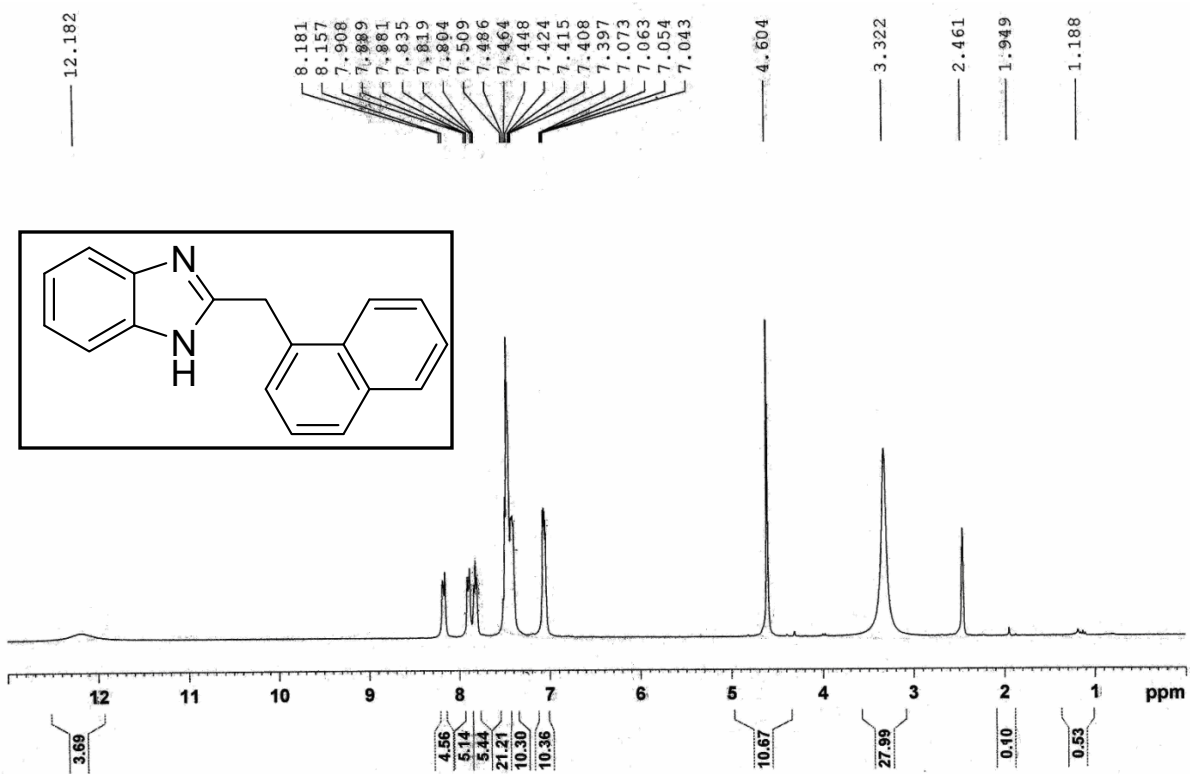

$^{13}\text{C}$ -NMR (Compound **3k**)

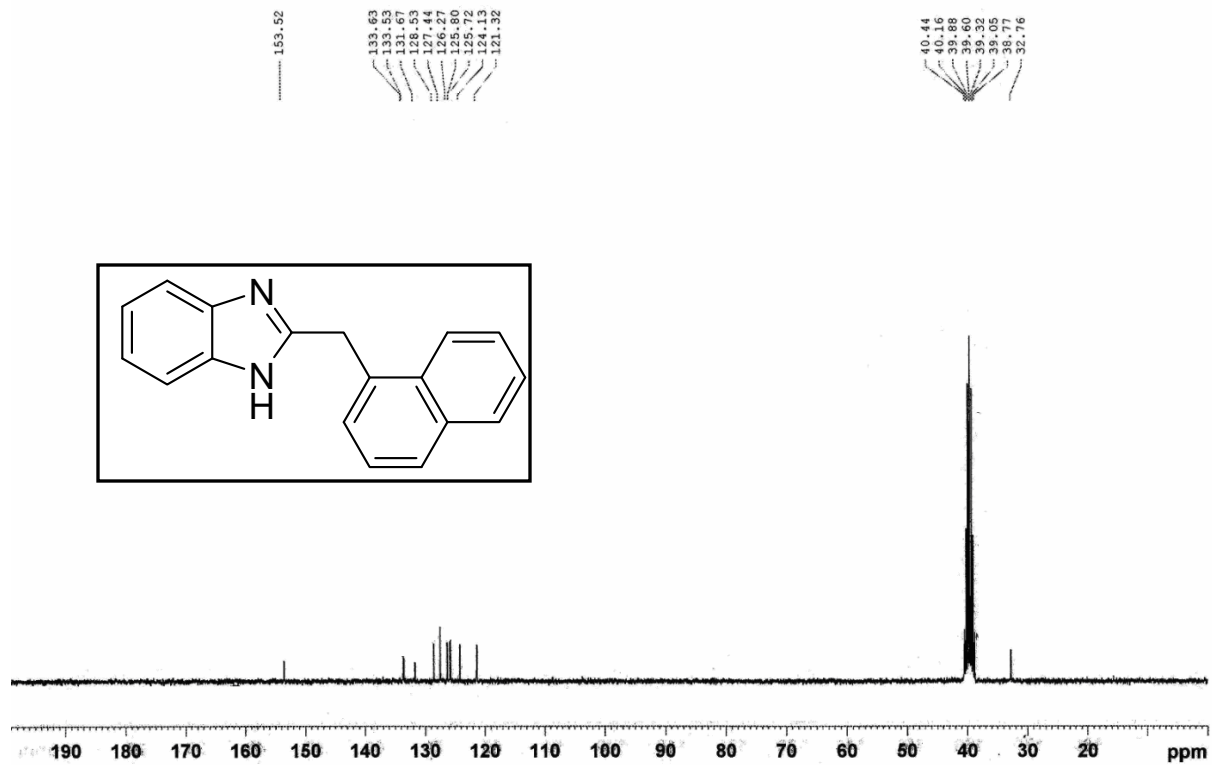

DEPT-135 (Compound **3k**)

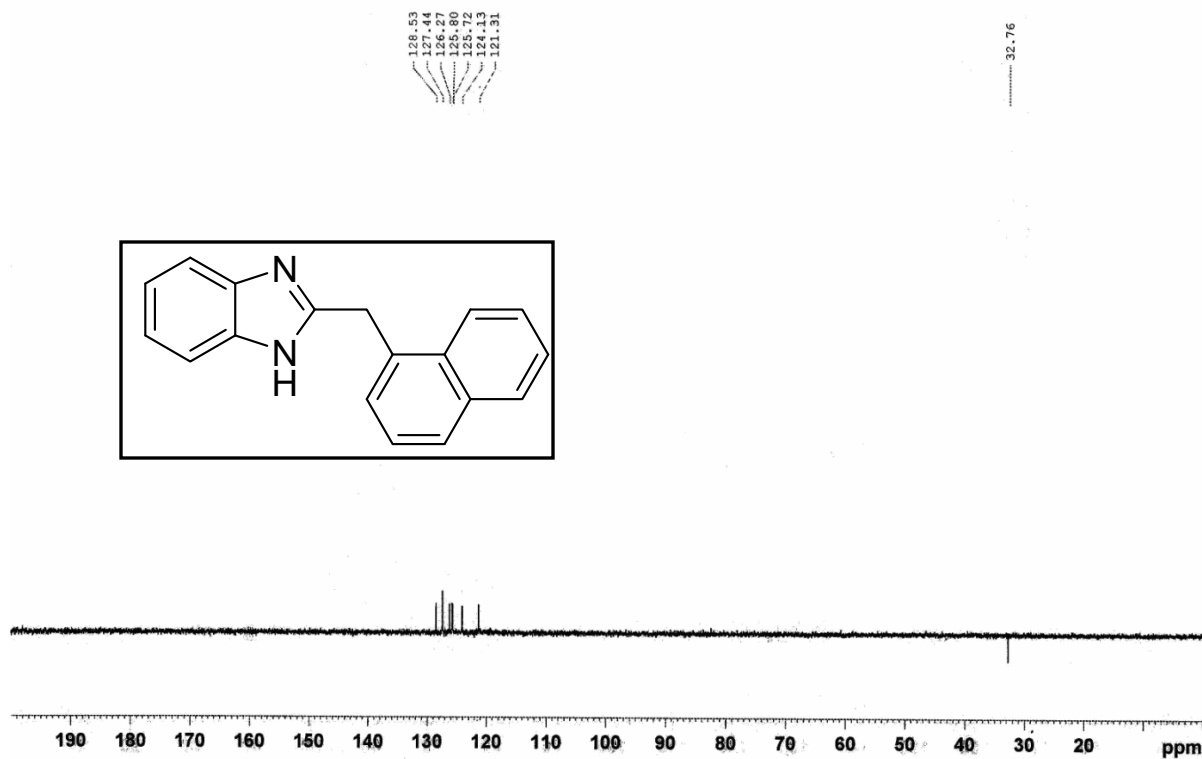

### Compound 31

#### <sup>1</sup>H-NMR

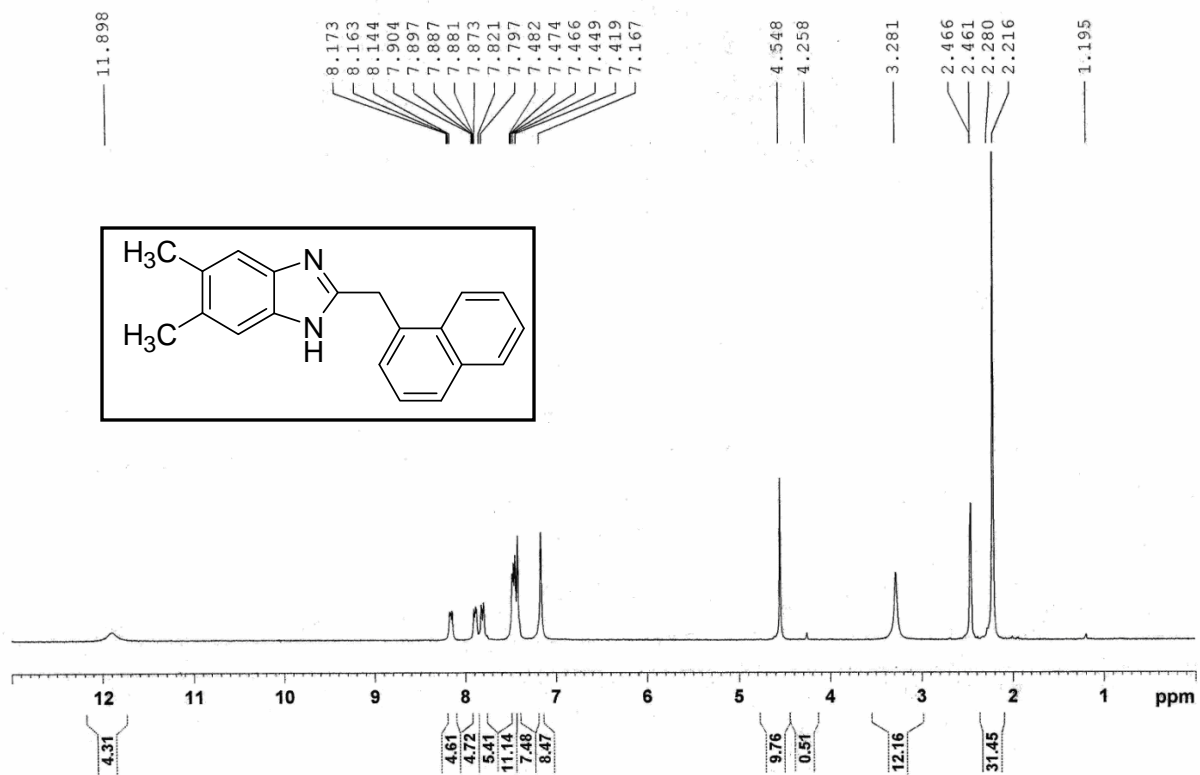

$^{13}\text{C}$ -NMR (Compound **31**)

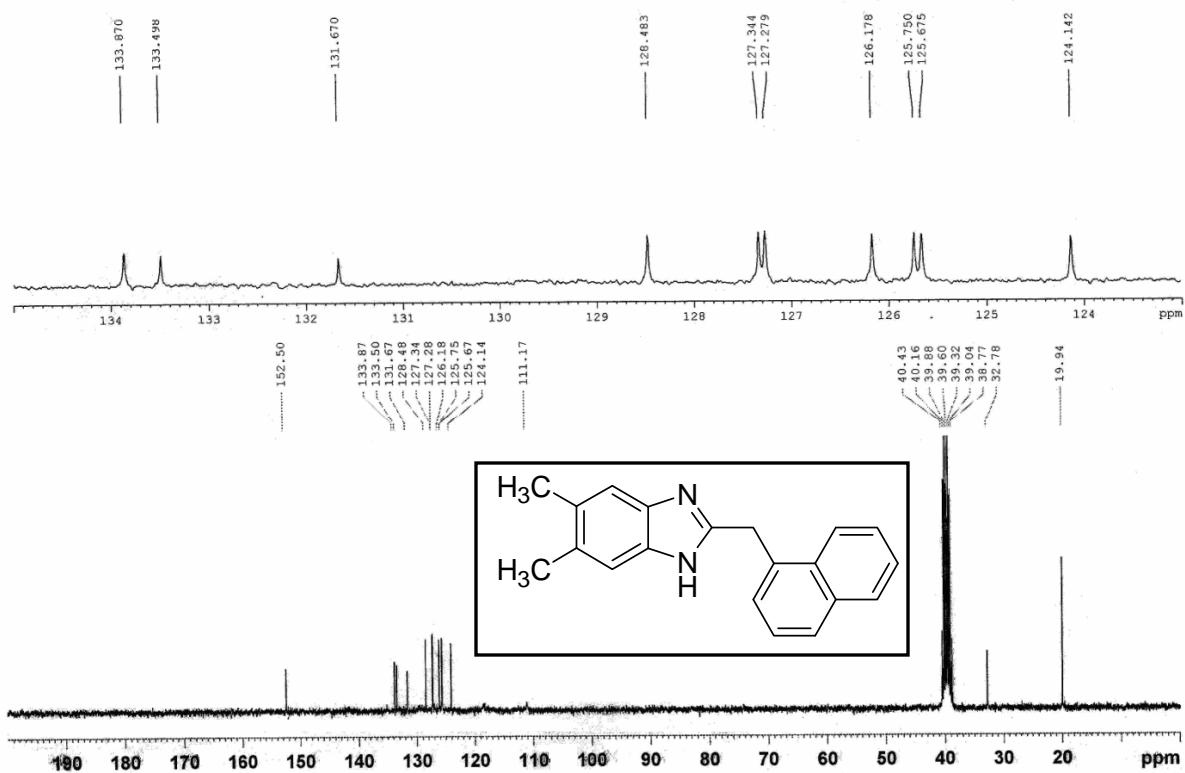

DEPT-135 (Compound **3I**)

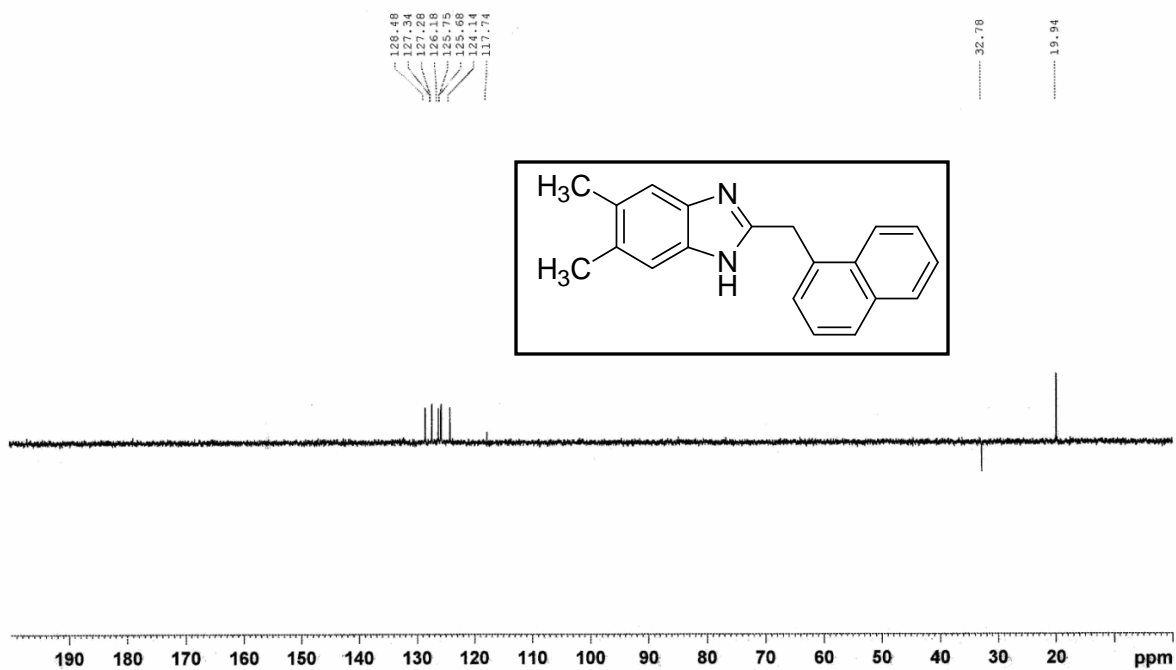



### Compound **3m**

<sup>1</sup>H-NMR

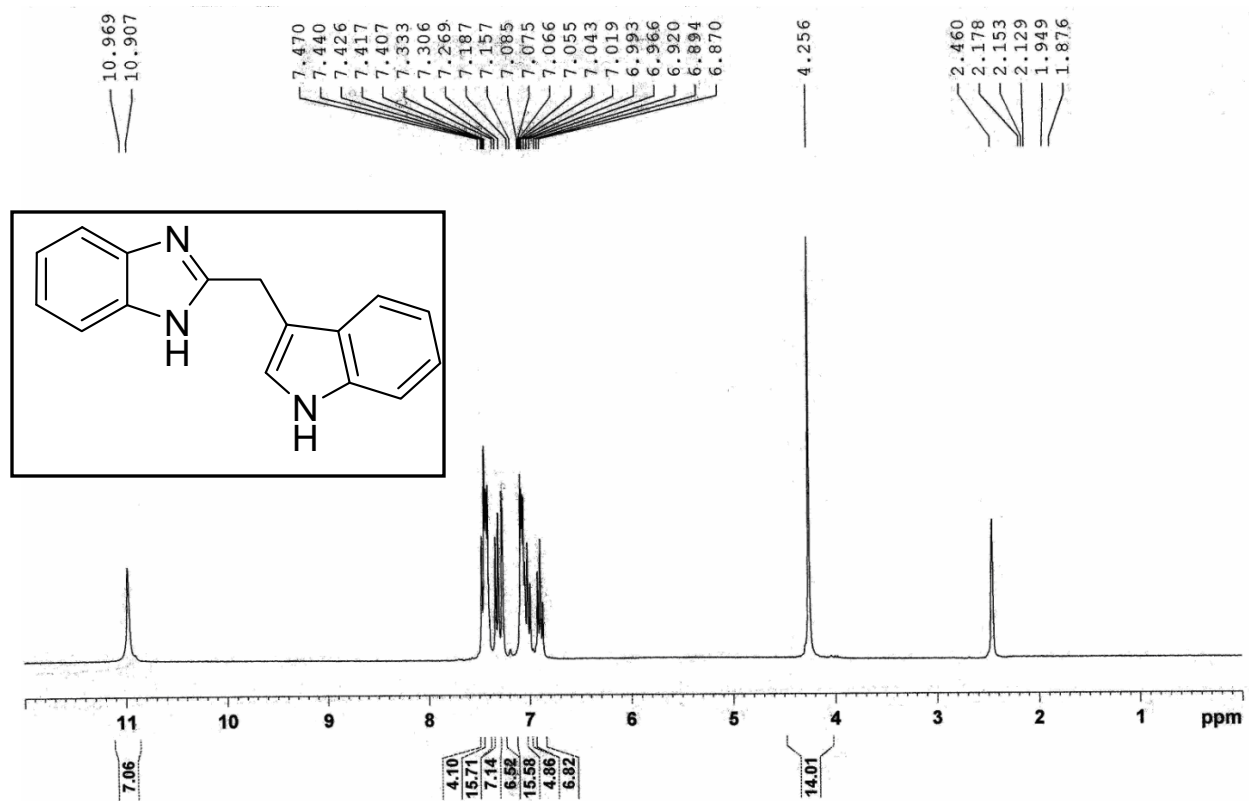

$^{13}\text{C}$ -NMR (Compound **3m**)

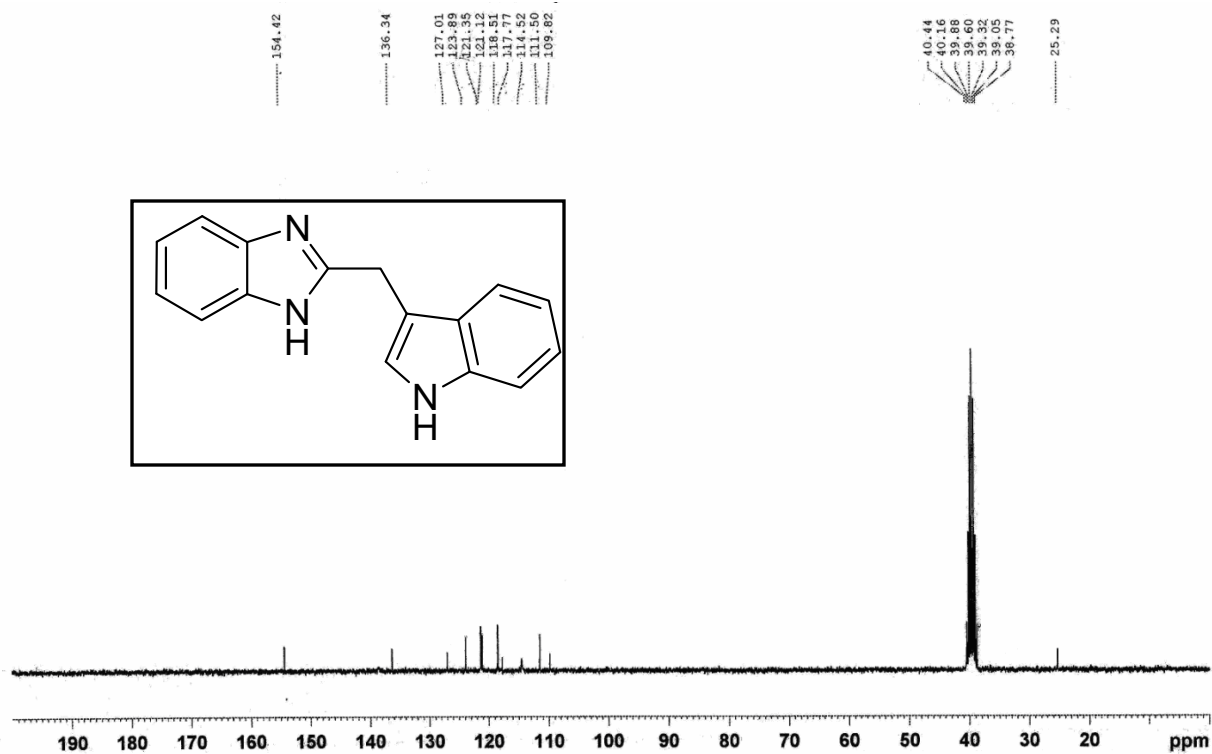

DEPT-135 (Compound **3m**)

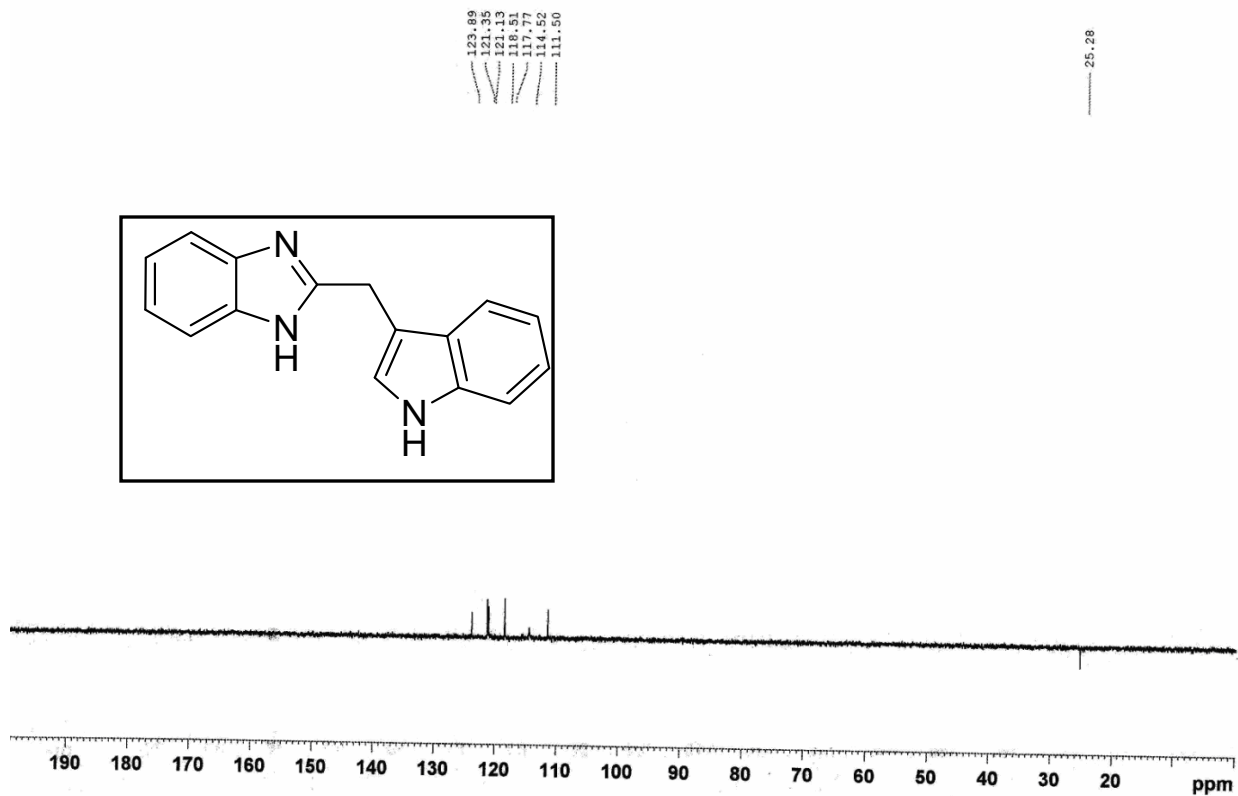

### Compound 3n

#### <sup>1</sup>H-NMR

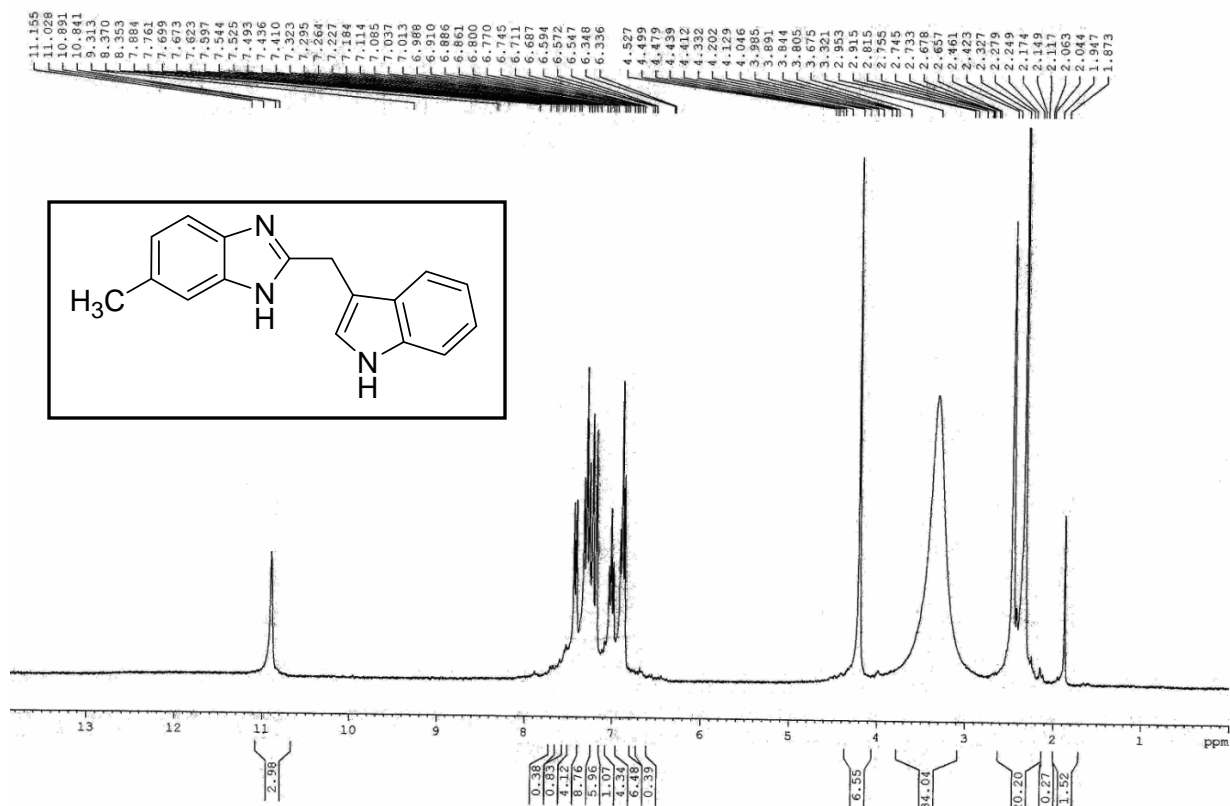

$^{13}\text{C}$ -NMR (Compound **3n**)

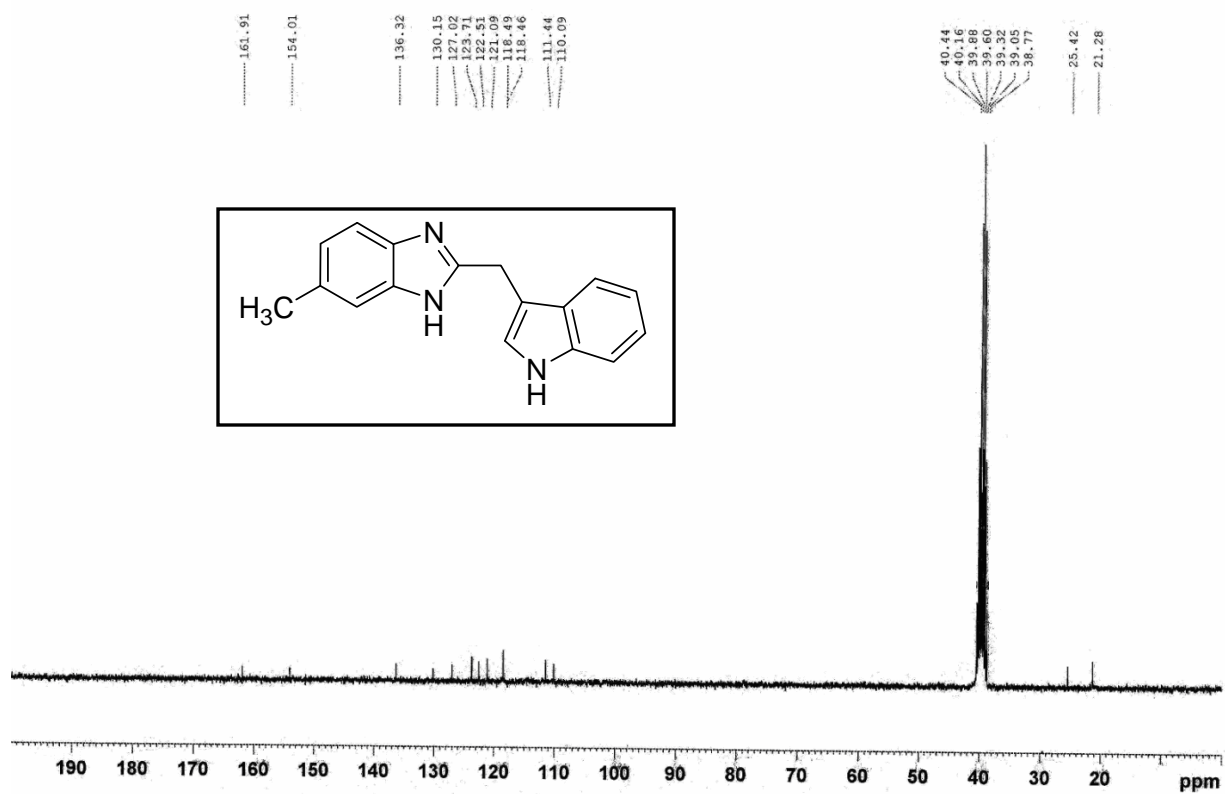

DEPT-135 (Compound **3n**)

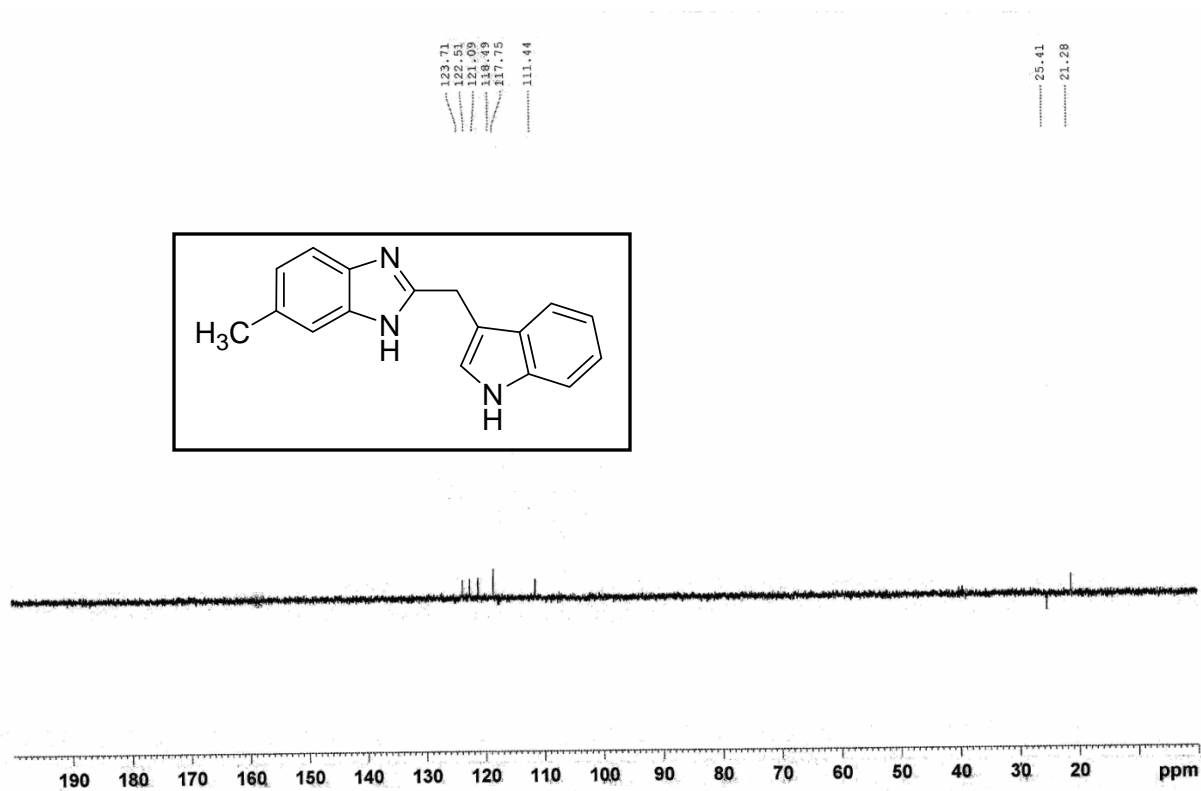

**Compound 30**

**<sup>1</sup>H-NMR**

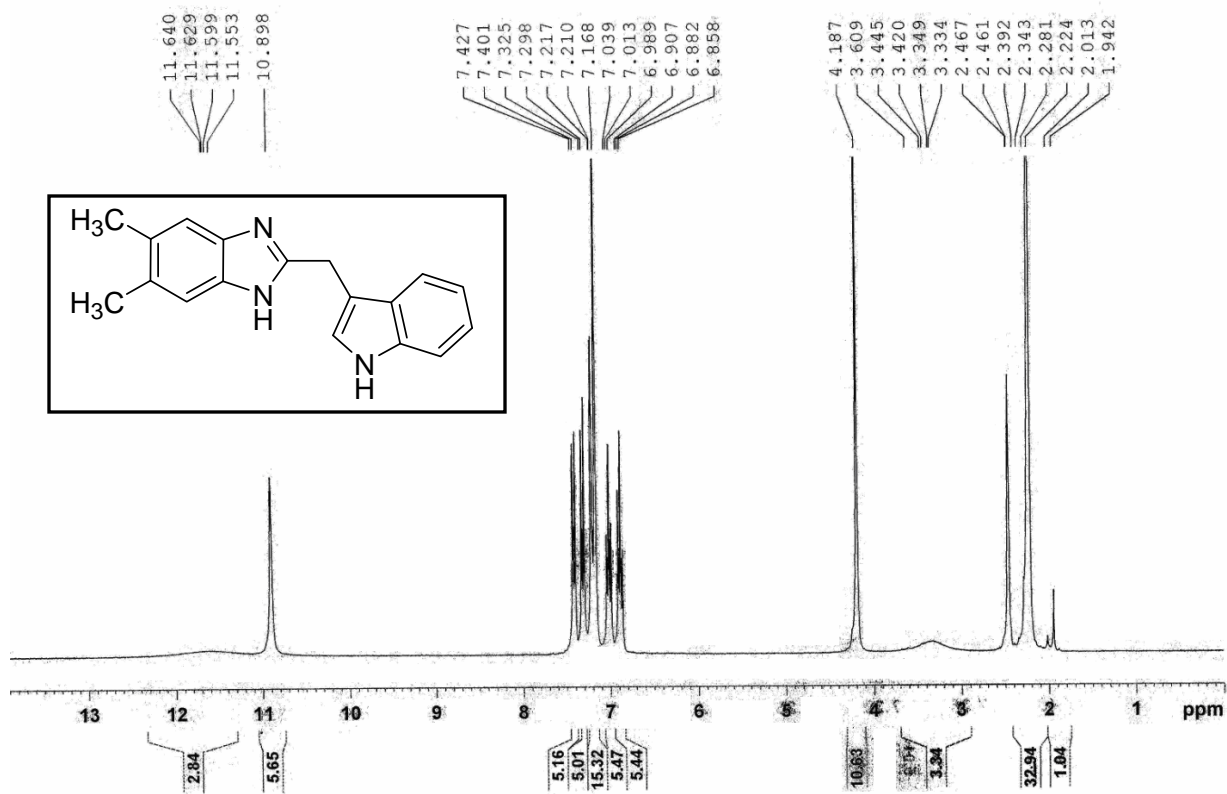

### <sup>13</sup>C-NMR (Compound **30**)

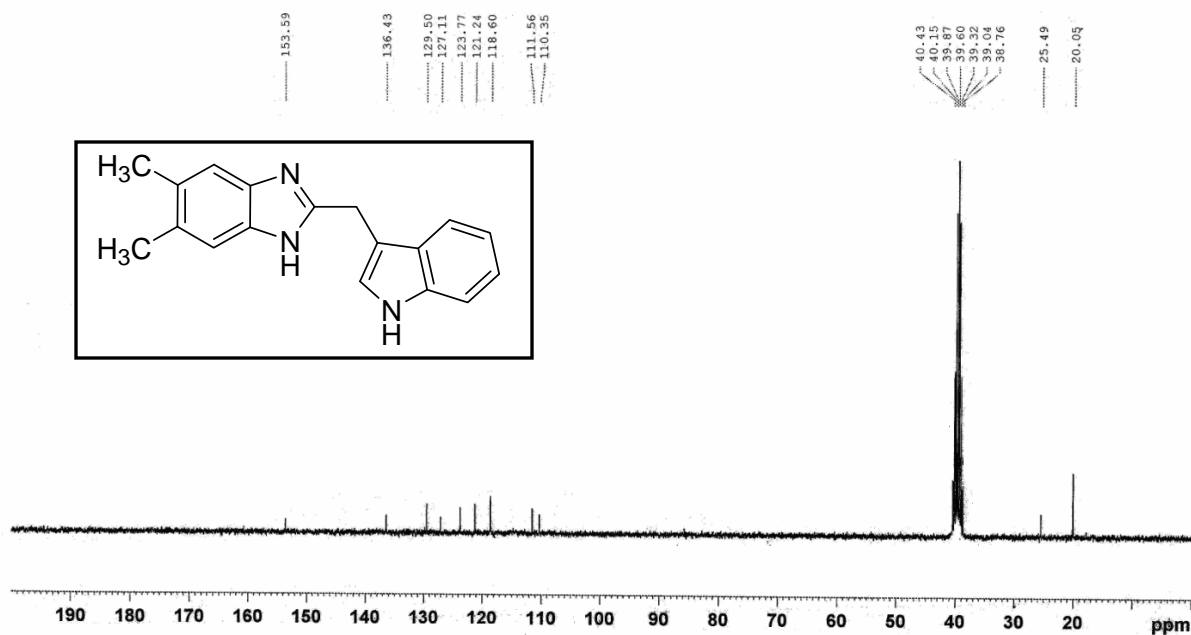

### DEPT-135 (Compound **30**)

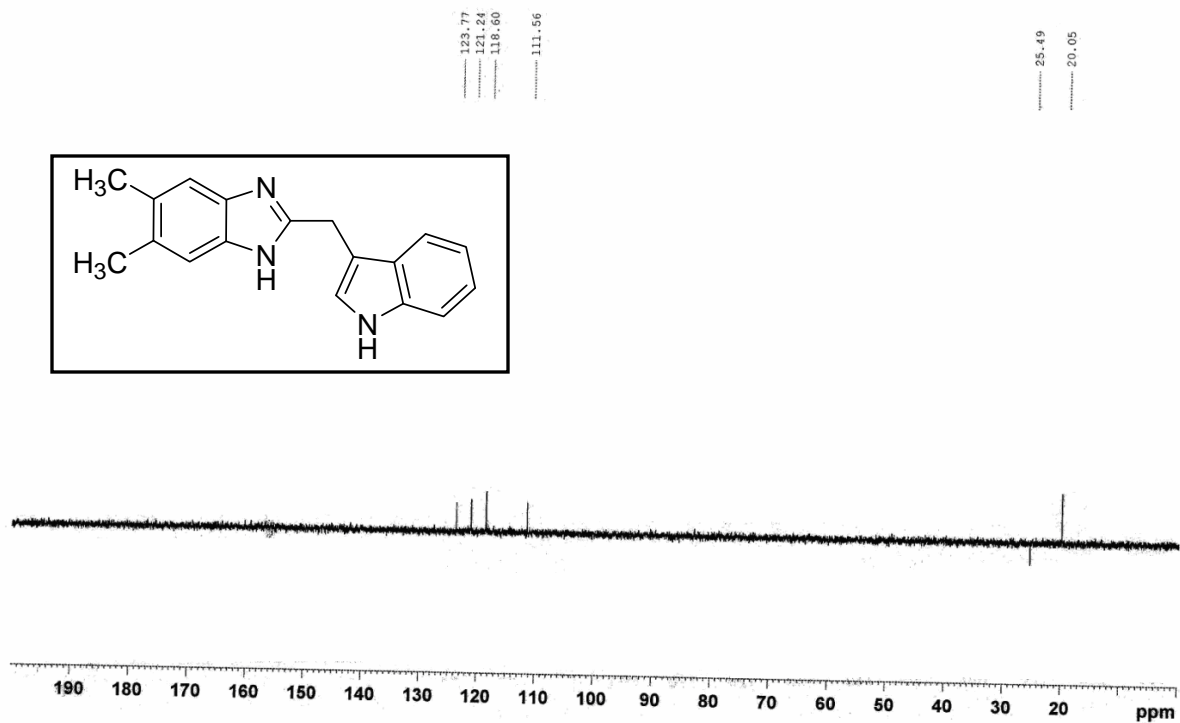



**Compound 3p**

<sup>1</sup>H-NMR

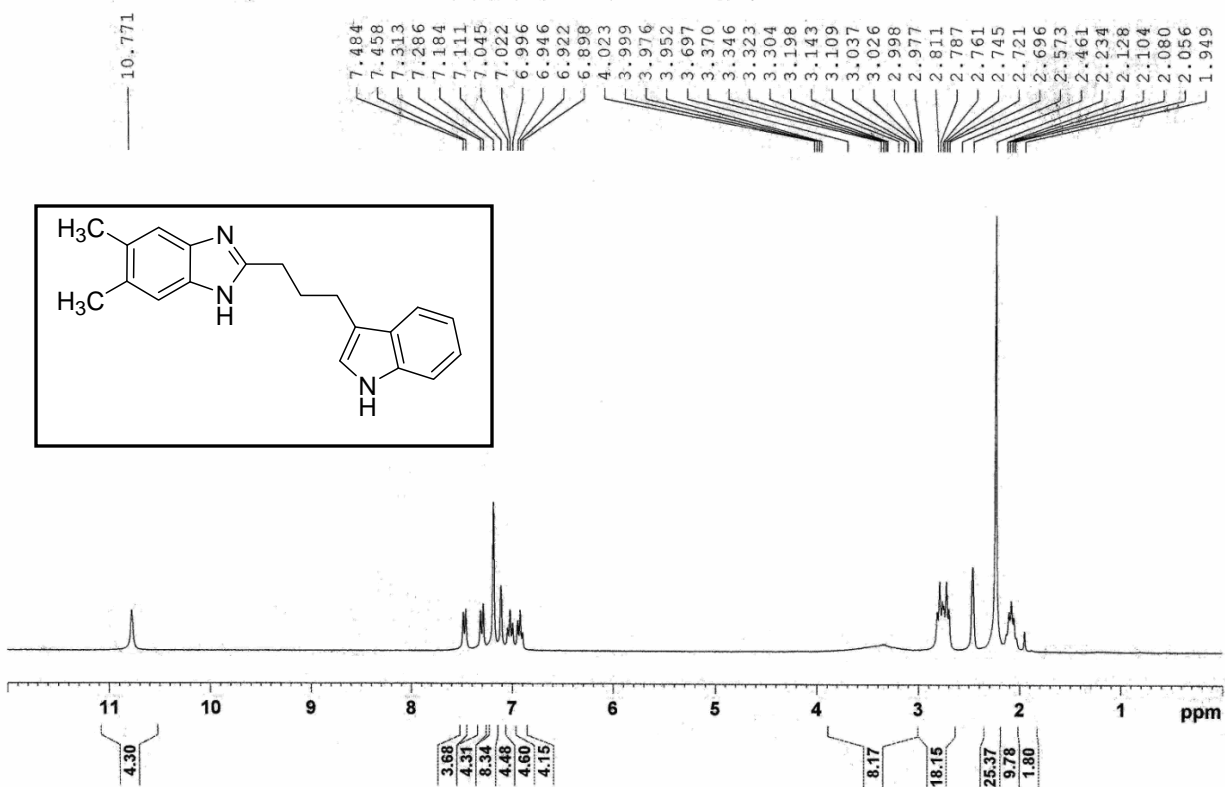

$^{13}\text{C}$ -NMR (Compound **3p**)

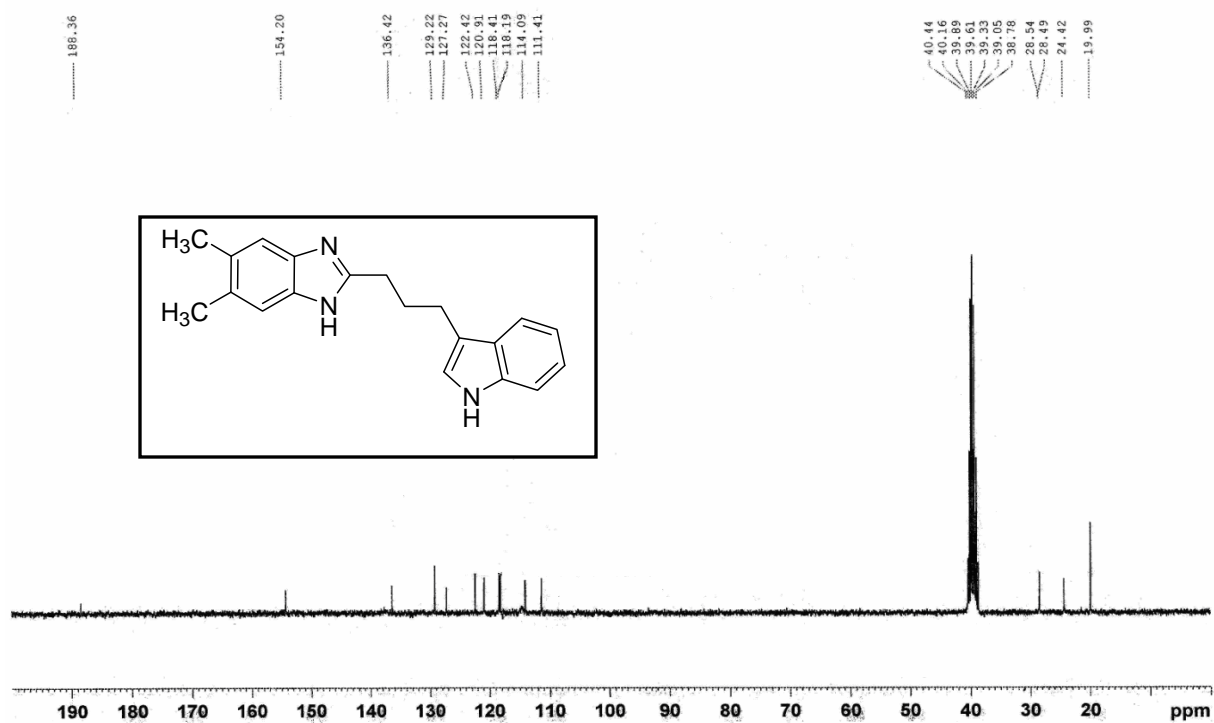

DEPT-135 (Compound **3p**)

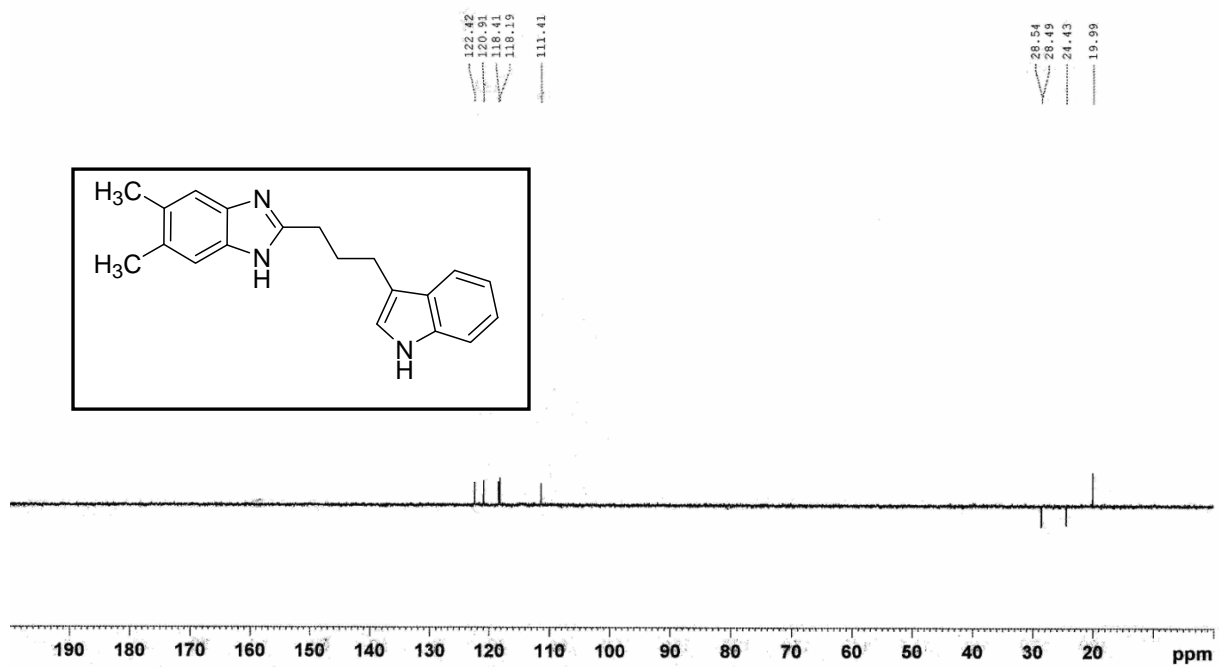

### Compound 3q

<sup>1</sup>H-NMR

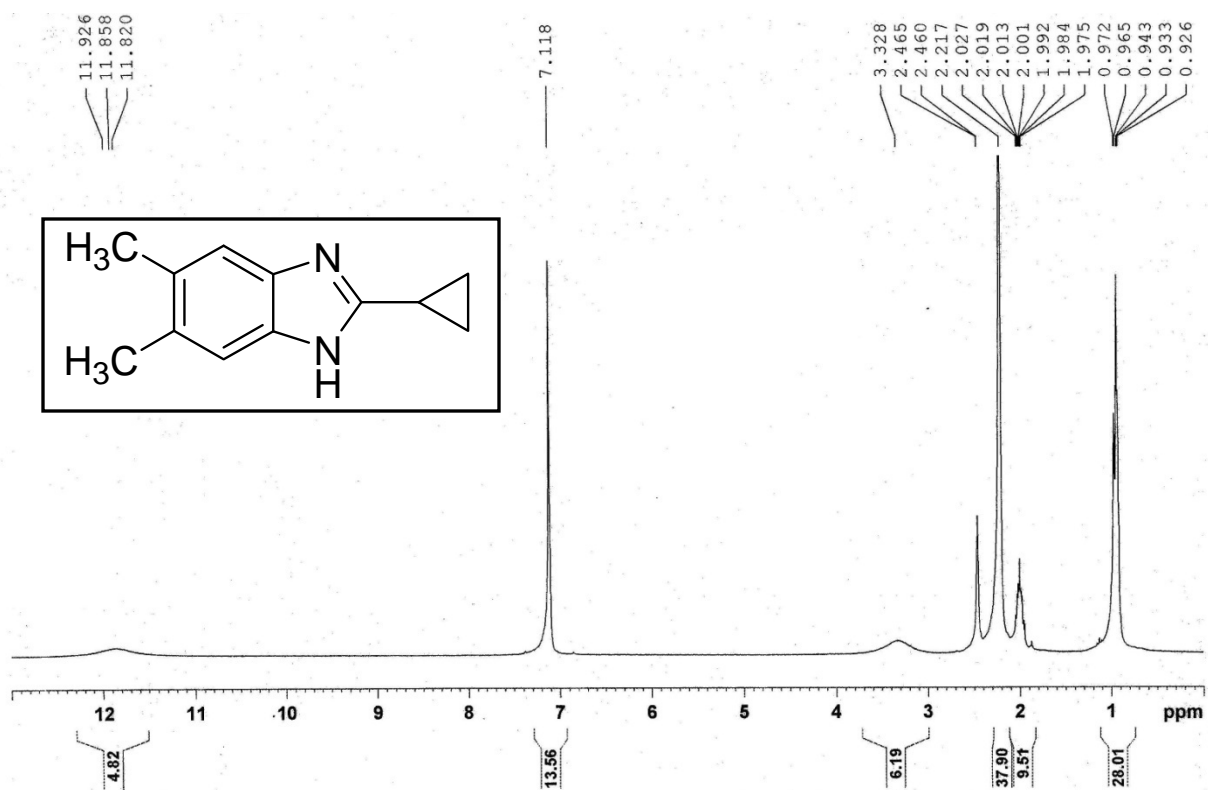

$^{13}\text{C}$ -NMR (Compound **3q**)

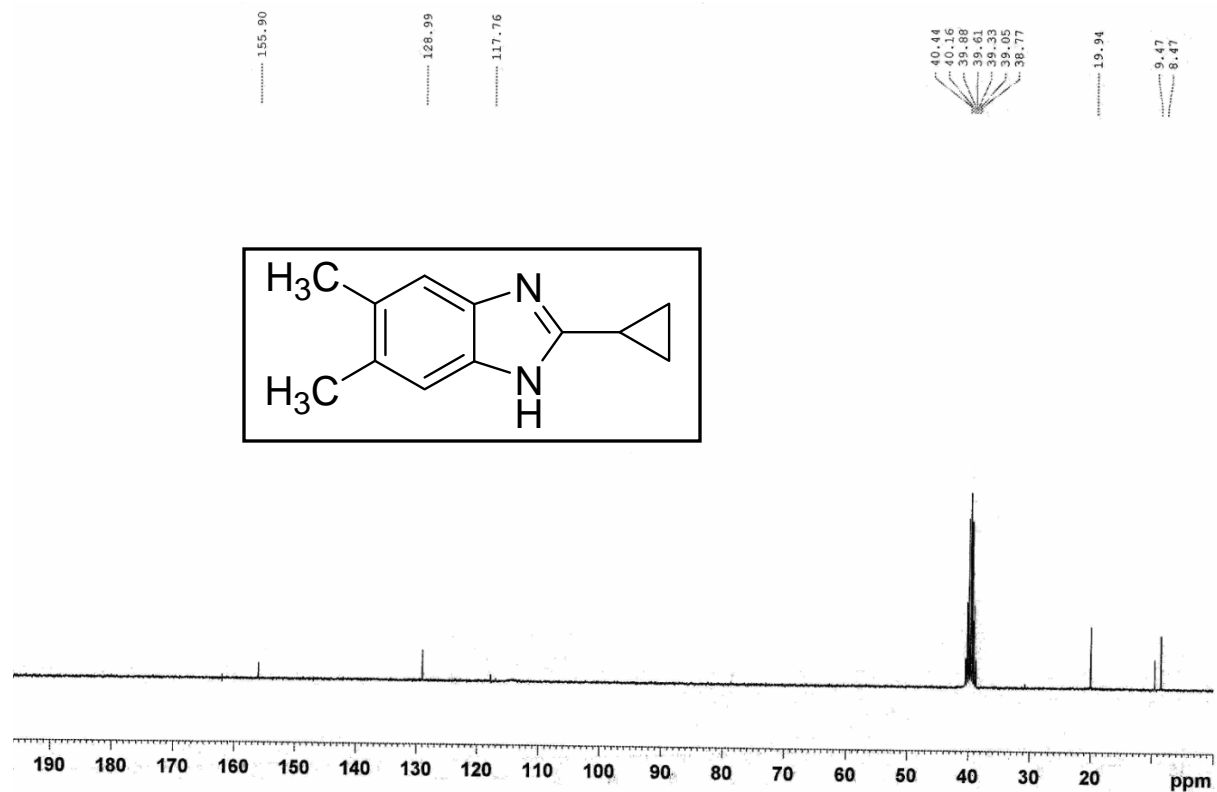

DEPT-135 (Compound **3q**)

29.42  
19.95  
9.47  
8.46

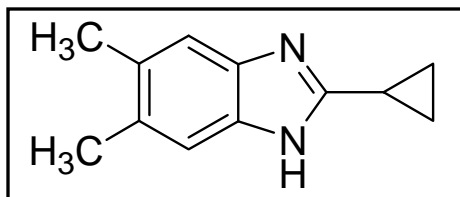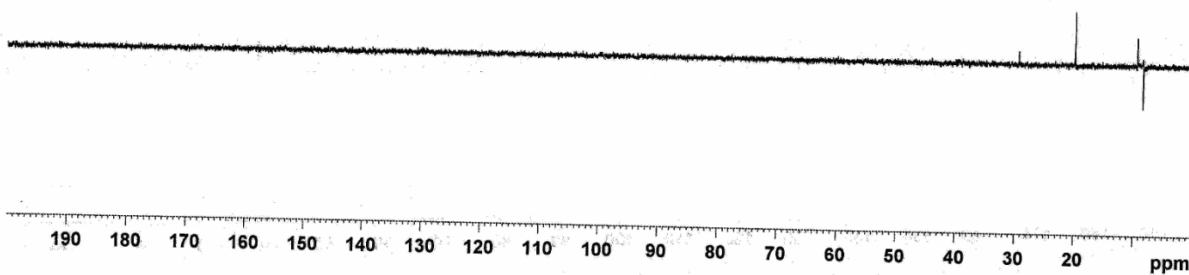

**Compound 3r**

<sup>1</sup>H-NMR

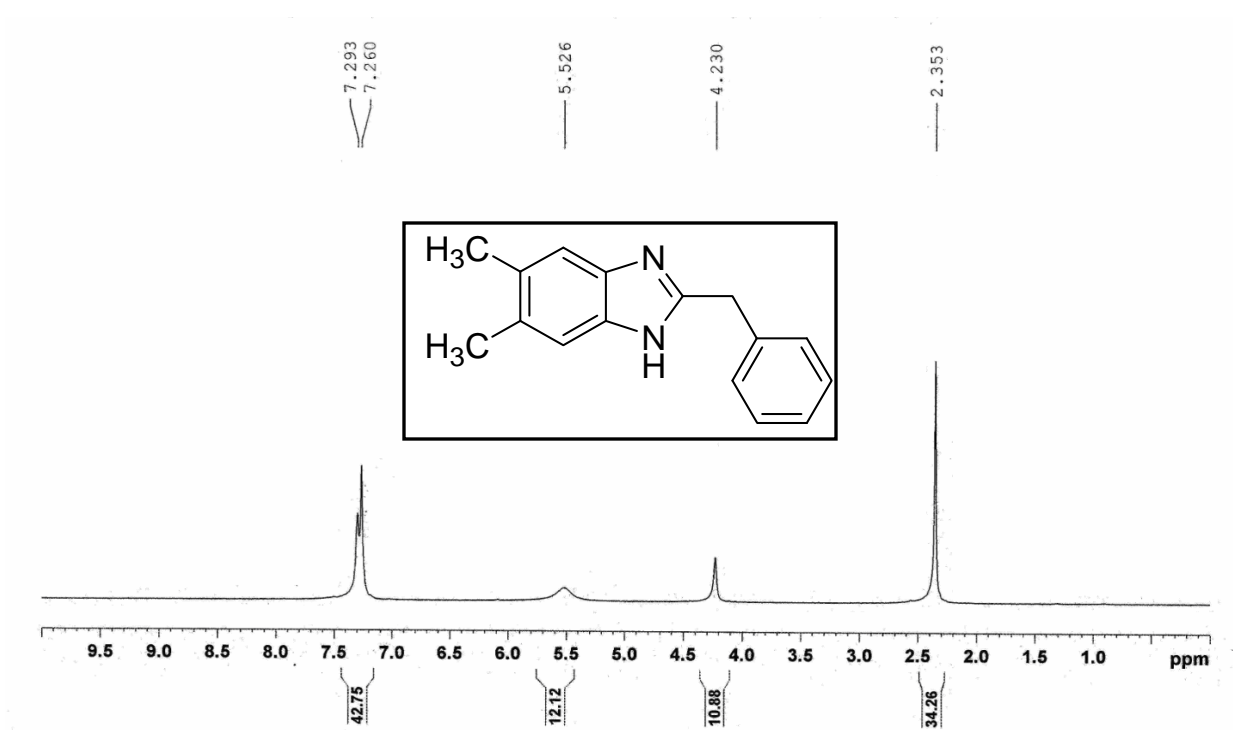

$^{13}\text{C}$ -NMR (Compound **3r**)

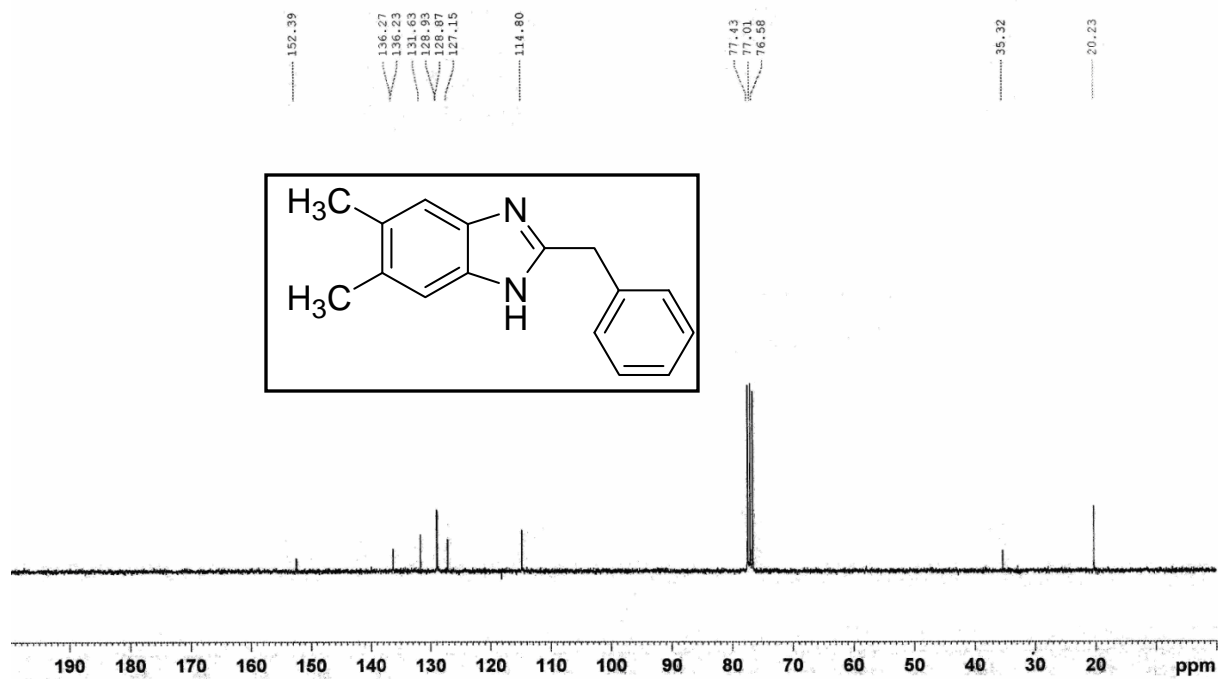

DEPT-135 (Compound **3r**)

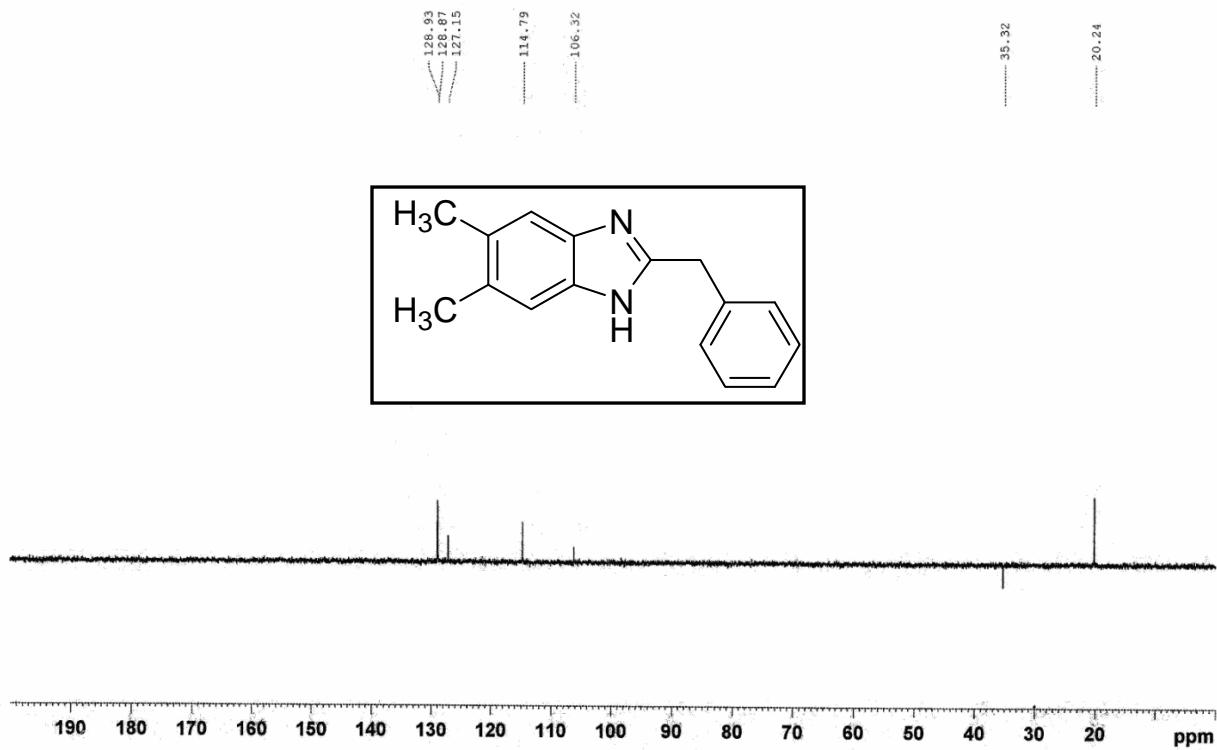

Supplement: c1ra00470k_5.pdf [file c1ra00470k_5.pdf]
