# Supplementary material for: Synthesis of 2-alkyl substituted benzimidazoles under microwave irradiation: Anti-proliferative effect of some representative compounds on human histiocytic lymphoma cell U937
Source: Royal Society of Chemistry journal article supplement (doi:10.1039/c1ra00470k), 2011-01-01
Supplement: c1ra00470k.pdf [file c1ra00470k.pdf]

# Synthesis of 2-alkyl substituted benzimidazoles under microwave irradiation: Anti-proliferative effect of some representative compounds on human histiocytic lymphoma cell U937

Chhanda Mukhopadhyay,<sup>\*a</sup> Sabari Ghosh,<sup>a</sup> Sumita Sengupta (Bandyopadhyay)<sup>b</sup> and Soumasree De<sup>b</sup>

<sup>a</sup>Department of Chemistry, University of Calcutta, 92 APC Road, Kolkata-700009, India; Tel: +91 9433019610; E-mail: cmukhop@yahoo.co.in

<sup>b</sup> Department of Biophysics, Molecular Biology and Bioinformatics, University of Calcutta, 92 APC Road, Kolkata-700009, India

## Supplementary Information Part 1

### Index

|                                                              | <u>page number</u> |
|--------------------------------------------------------------|--------------------|
| 1. General procedure for the synthesis of the benzimidazoles | 2                  |
| 2. Characterization data of the synthesized compounds        | 2                  |

**1. General procedure for the synthesis of the benzimidazoles:** A typical example is as follows. Heptanoic acid **1a** (0.14 ml, 1.0 mmol) was added to 4, 5-dimethyl-1, 2-phenylenediamine **2a** (136 mg, 1.0 mmol). 62% aqueous hexafluorophosphoric acid (0.01 ml, 0.1 mmol) was added. The reaction mixture was mixed thoroughly and then heated in a microwave for 5 minutes (600 Watt) at 115 °C. It was then allowed to cool down to room temperature. TLC was checked. Unfortunately, the starting amine and the product **3a** give the same RF value of 0.8 (100% ethyl acetate or at any other possible concentration of the running solvent). It is also true for compounds **3k**, **3l**, **3m**, **3n**, **3o**, **3p** and **3q**. For workup, 10% NaOH solution was added followed by rigorous titration. The solid which remained was filtered off, washed several times with distilled water and purified by recrystallisation from ethyl acetate and hexanes. The yield of compound **3a** was 96%.

**2. Characterization data of the synthesized compounds:**

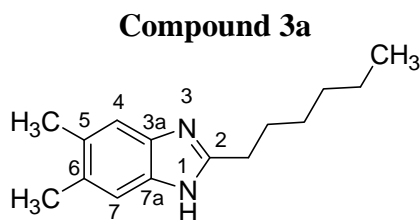

2-Hexyl-5,6-dimethyl-1H-benzimidazole (**3a**): sticky solid;  $^1\text{H}$  NMR (300 MHz,  $\text{CDCl}_3$ ):  $\delta$  (ppm) 12.71 (s, 1H,  $\text{N}_1\text{H}$ ), 7.25 (s, 2H,  $\text{H}_4$  and  $\text{H}_7$ ), 2.86 (t,  $J = 7.5$  Hz, 2H,  $\text{C}_2\text{-CH}_2$ ), 2.22 (s, 6H,  $\text{C}_5\text{-CH}_3$  and  $\text{C}_6\text{-CH}_3$ ), 1.79-1.69 (m, 2H,  $\text{C}_2\text{-CH}_2\text{-CH}_2$ ), 1.20-1.05 (m, 6H,  $\text{C}_2\text{-CH}_2\text{-CH}_2\text{-CH}_2\text{-CH}_2\text{-CH}_2$ ) and 0.75 (br s, 3H,  $\text{C}_2\text{-(CH}_2)_5\text{-CH}_3$ );  $^{13}\text{C}$  NMR (75 MHz,  $\text{CDCl}_3$ ):  $\delta$  155.2 ( $\text{C}_2$ ), 137.0 ( $\text{C}_{3a}$  and  $\text{C}_{7a}$ ), 130.6 ( $\text{C}_5$  and  $\text{C}_6$ ), 114.7 ( $\text{C}_4$  and  $\text{C}_7$ ), 31.4 ( $\text{C}_2\text{-CH}_2$ ), 29.2 ( $\text{C}_2\text{-CH}_2\text{-CH}_2$ ), 29.0 ( $\text{C}_2\text{-CH}_2\text{-CH}_2\text{-CH}_2$ ), 28.5 ( $\text{C}_2\text{-CH}_2\text{-CH}_2\text{-CH}_2\text{-CH}_2$ ), 22.4 ( $\text{C}_2\text{-CH}_2\text{-CH}_2\text{-CH}_2\text{-CH}_2\text{-CH}_2$ ), 20.1 ( $\text{C}_5\text{-CH}_3$  and  $\text{C}_6\text{-CH}_3$ ).

$\underline{\text{C}}\text{H}_3$  and  $\text{C}_6\text{-}\underline{\text{C}}\text{H}_3$ ) and 13.8 ( $\text{C}_2\text{-(CH}_2\text{)}_5\text{-}\underline{\text{C}}\text{H}_3$ ); IR(KBr) 2927, 1451 and  $1020\text{ cm}^{-1}$ ; Anal. Calcd for  $\text{C}_{15}\text{H}_{22}\text{N}_2$ : C, 78.21; H, 9.63; N, 12.16. Found: C, 78.21; H, 9.61; N, 12.15; Yield: 96%

### Compound 3b

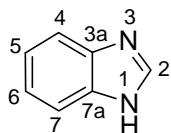

1H-Benzoimidazole (**3b**): brown solid;  $170\text{ }^\circ\text{C}$  (m.p.);  $^1\text{H NMR}$  (300 MHz,  $\text{DMSO-}d_6$ ):  $\delta$  (ppm) 8.18 (s, 1H,  $\text{C}_2\text{-H}$ ), 7.56-7.54 (m, 2H,  $\text{H}_5$  and  $\text{H}_6$ ) and 7.15-7.12 (m, 2H,  $\text{H}_4$  and  $\text{H}_7$ );  $^{13}\text{C NMR}$  (75 MHz,  $\text{DMSO-}d_6$ ):  $\delta$  142.1 ( $\text{C}_2$ ), 138.2 ( $\text{C}_{3a}$  and  $\text{C}_{7a}$ ), 121.9 ( $\text{C}_5$  and  $\text{C}_6$ ) and 115.4 ( $\text{C}_4$  and  $\text{C}_7$ ); IR(KBr) 2793, 1407, 1245 and  $744\text{ cm}^{-1}$ ; Anal. Calcd for  $\text{C}_7\text{H}_6\text{N}_2$ : C, 71.17; H, 5.12; N, 23.71. Found: C, 71.17; H, 5.11; N, 23.70; Yield: 90%

### Compound 3c

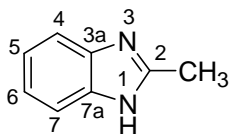

2-Methyl-1H-benzoimidazole (**3c**): brown solid;  $175\text{-}176\text{ }^\circ\text{C}$  (m.p.);  $^1\text{H NMR}$  (300 MHz,  $\text{CDCl}_3$ ):  $\delta$  (ppm) 7.57-7.51 (m, 2H,  $\text{H}_5$  and  $\text{H}_6$ ), 7.42 (br s, 1H,  $\text{N}_1\text{H}$ ), 7.24-7.19 (m, 2H,  $\text{H}_4$  and  $\text{H}_7$ ) and 2.65 (s, 3H,  $\text{C}_2\text{-CH}_3$ );  $^{13}\text{C NMR}$  (75 MHz,  $\text{CDCl}_3$ ):  $\delta$  151.2 ( $\text{C}_2$ ), 138.6 ( $\text{C}_{3a}$  and  $\text{C}_{7a}$ ), 122.2 ( $\text{C}_5$  and  $\text{C}_6$ ), 114.5 ( $\text{C}_4$  and  $\text{C}_7$ ) and 14.9 ( $\text{C}_2\text{-CH}_3$ ); IR(KBr) 2673, 1384, 1267 and  $732\text{ cm}^{-1}$ ; Anal. Calcd for  $\text{C}_8\text{H}_8\text{N}_2$ : C, 72.70; H, 6.10; N, 21.20. Found: C, 72.70; H, 6.12; N, 21.20; Yield: 85%

### Compound 3d

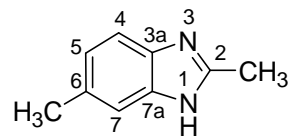

2,6-Dimethyl-1H-benzimidazole (**3d**): brown solid; 202 °C (m.p.);  $^1\text{H}$  NMR (300 MHz,  $\text{CDCl}_3$ ):  $\delta$  (ppm) 8.92 (br s, 1H,  $\text{N}_1\text{H}$ ), 7.45 (d,  $J = 8.1$  Hz, 1H,  $\text{H}_4$ ), 7.34 (s, 1H,  $\text{H}_7$ ), 7.05 (d,  $J = 8.1$  Hz, 1H,  $\text{H}_5$ ), 2.63 (s, 3H,  $\text{C}_2\text{-CH}_3$ ) and 2.44 (s, 3H,  $\text{C}_6\text{-CH}_3$ );  $^{13}\text{C}$  NMR (75 MHz,  $\text{CDCl}_3$ ):  $\delta$  151.0 ( $\text{C}_2$ ), 138.1 ( $\text{C}_{3a}$ ), 136.7 ( $\text{C}_{7a}$ ), 132.0 ( $\text{C}_6$ ), 123.7 ( $\text{C}_4$ ), 114.2 ( $\text{C}_7$ ), 113.9 ( $\text{C}_5$ ), 21.5 ( $\text{C}_6\text{-CH}_3$ ) and 14.7 ( $\text{C}_2\text{-CH}_3$ ); IR(KBr) 2918, 1450, 1400, 1281, 1027 and 801  $\text{cm}^{-1}$ ; Anal. Calcd for  $\text{C}_9\text{H}_{10}\text{N}_2$ : C, 73.94; H, 6.89; N, 19.16. Found: C, 73.94; H, 6.89; N, 19.17; Yield: 76%

### Compound 3e

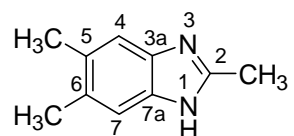

2,5,6-Trimethyl-1H-benzimidazole (**3e**): light brown solid; 229-231 °C (m.p.);  $^1\text{H}$  NMR (300 MHz,  $\text{DMSO-}d_6$ ):  $\delta$  (ppm) 11.86 (br s, 1H,  $\text{N}_1\text{H}$ ), 7.16 (s, 2H,  $\text{H}_4$  and  $\text{H}_7$ ), 2.38 (s, 3H,  $\text{C}_2\text{-CH}_3$ ) and 2.22 (s, 6H,  $\text{C}_5\text{-CH}_3$  and  $\text{C}_6\text{-CH}_3$ );  $^{13}\text{C}$  NMR (75 MHz,  $\text{DMSO-}d_6$ ):  $\delta$  150.3 ( $\text{C}_2$ ,  $\text{C}_{3a}$  and  $\text{C}_{7a}$ ), 129.2 ( $\text{C}_4$ ,  $\text{C}_5$ ,  $\text{C}_6$  and  $\text{C}_7$ ), 20.0 ( $\text{C}_5\text{-CH}_3$  and  $\text{C}_6\text{-CH}_3$ ) and 14.7 ( $\text{C}_2\text{-CH}_3$ ); IR(KBr) 2922, 1458, 1389, 1010 and 856  $\text{cm}^{-1}$ ; Anal. Calcd for  $\text{C}_{10}\text{H}_{12}\text{N}_2$ : C, 74.97; H, 7.55; N, 17.48. Found: C, 74.99; H, 7.56; N, 17.49; Yield: 90%

### Compound 3f

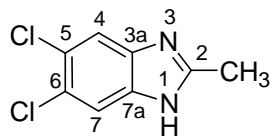

5,6-Dichloro-2-methyl-1H-benzimidazole (**3f**): grey solid; 249 °C (m.p.);  $^1\text{H}$  NMR (300 MHz, DMSO- $d_6$ ):  $\delta$  (ppm) 12.49 (br s, 1H,  $\text{N}_1\text{H}$ ), 7.69 (s, 2H,  $\text{H}_4$  and  $\text{H}_7$ ) and 2.48 ( $\text{C}_2\text{-CH}_3$ );  $^{13}\text{C}$  NMR (75 MHz, DMSO- $d_6$ ):  $\delta$  154.9 ( $\text{C}_2$ ,  $\text{C}_{3a}$  and  $\text{C}_{7a}$ ), 123.9 ( $\text{C}_4$ ,  $\text{C}_5$ ,  $\text{C}_6$  and  $\text{C}_7$ ) and 15.1 ( $\text{CH}_3$ ); IR(KBr) 3110, 1446, 1373, 1019 and 859  $\text{cm}^{-1}$ ; Anal. Calcd for  $\text{C}_8\text{H}_6\text{Cl}_2\text{N}_2$ : C, 47.79; H, 3.01; Cl, 35.27; N, 13.93. Found: C, 47.80; H, 3.01; Cl, 35.25; N, 13.93; Yield: 65%

### Compound 3g

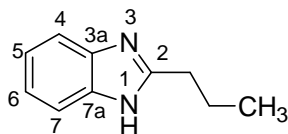

2-Propyl-1H-benzimidazole (**3g**): brown solid; 160-162 °C (m.p.);  $^1\text{H}$  NMR (300 MHz,  $\text{CDCl}_3$ ):  $\delta$  (ppm) 7.94 (br s, 1H,  $\text{N}_1\text{H}$ ), 7.61-7.58 (m, 2H,  $\text{H}_5$  and  $\text{H}_6$ ), 7.28-7.24 (m, 2H,  $\text{H}_4$  and  $\text{H}_7$ ), 2.98 (t,  $J = 7.5$  Hz, 2H,  $\text{C}_2\text{-CH}_2$ ), 1.99-1.87 (m, 2H,  $\text{C}_2\text{-CH}_2\text{-CH}_2$ ) and 1.00 (t,  $J = 7.5$  Hz, 3H,  $\text{C}_2\text{-CH}_2\text{-CH}_2\text{-CH}_3$ );  $^{13}\text{C}$  NMR (75 MHz,  $\text{CDCl}_3$ ):  $\delta$  155.0 ( $\text{C}_2$ ), 137.7 ( $\text{C}_{3a}$  and  $\text{C}_{7a}$ ), 122.5 ( $\text{C}_5$  and  $\text{C}_6$ ), 114.5 ( $\text{C}_4$  and  $\text{C}_7$ ), 30.9 ( $\text{C}_2\text{-CH}_2$ ), 21.6 ( $\text{C}_2\text{-CH}_2\text{-CH}_2$ ) and 13.8 ( $\text{C}_2\text{-CH}_2\text{-CH}_2\text{-CH}_3$ ); IR(KBr) 2958, 1427, 1268 and 745  $\text{cm}^{-1}$ ; Anal. Calcd for  $\text{C}_{10}\text{H}_{12}\text{N}_2$ : C, 74.97; H, 7.55; N, 17.48. Found: C, 74.98; H, 7.56; N, 17.47; Yield: 80%

### Compound 3h

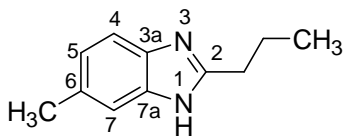

6-Methyl-2-propyl-1H-benzimidazole (**3h**): light brown solid; 153-154 °C (m.p.); <sup>1</sup>H NMR (300 MHz, CDCl<sub>3</sub>): δ (ppm) 9.08 (br s, 1H, N<sub>1</sub>H), 7.44 (d, *J* = 8.1 Hz, 1H, H<sub>4</sub>), 7.33 (s, 1H, H<sub>7</sub>), 7.04 (d, *J* = 8.1 Hz, 1H, H<sub>5</sub>), 2.90 (t, *J* = 7.5 Hz, 2H, C<sub>2</sub>-CH<sub>2</sub>), 2.44 (s, 3H, C<sub>6</sub>-CH<sub>3</sub>), 1.94-1.81 (m, 2H, C<sub>2</sub>-CH<sub>2</sub>-CH<sub>2</sub>) and 0.97 (t, *J* = 7.5 Hz, 3H, C<sub>2</sub>-CH<sub>2</sub>-CH<sub>2</sub>-CH<sub>3</sub>); <sup>13</sup>C NMR (75 MHz, CDCl<sub>3</sub>): δ 155.1 (C<sub>2</sub>), 138.4 (C<sub>3a</sub>), 137.0 (C<sub>7a</sub>), 131.8 (C<sub>6</sub>), 123.4 (C<sub>4</sub>), 114.4 (C<sub>7</sub>), 114.1 (C<sub>5</sub>), 31.2 (C<sub>2</sub>-CH<sub>2</sub>), 21.7 (C<sub>2</sub>-CH<sub>2</sub>-CH<sub>2</sub>), 21.6 (C<sub>6</sub>-CH<sub>3</sub>) and 13.8 (C<sub>2</sub>-CH<sub>2</sub>-CH<sub>2</sub>-CH<sub>3</sub>); IR(KBr) 2959, 1446, 1281 and 798 cm<sup>-1</sup>; Anal. Calcd for C<sub>11</sub>H<sub>14</sub>N<sub>2</sub>: C, 75.82; H, 8.10; N, 16.08. Found: C, 75.81; H, 8.11; N, 16.08; Yield: 78%

### Compound 3i

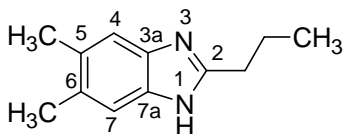

5,6-Dimethyl-2-propyl-1H-benzimidazole (**3i**): light brown solid; 167 °C (m.p.); <sup>1</sup>H NMR (300 MHz, DMSO-*d*<sub>6</sub>): δ (ppm) 11.86 (br s, 1H, N<sub>1</sub>H), 7.17 (s, 2H, H<sub>4</sub> and H<sub>7</sub>), 2.68 (t, *J* = 7.5 Hz, 2H, C<sub>2</sub>-CH<sub>2</sub>), 2.23 (s, 6H, C<sub>5</sub>-CH<sub>3</sub> and C<sub>6</sub>-CH<sub>3</sub>), 1.77-1.67 (m, 2H, C<sub>2</sub>-CH<sub>2</sub>-CH<sub>2</sub>) and 0.88 (t, *J* = 7.5 Hz, 3H, C<sub>2</sub>-CH<sub>2</sub>-CH<sub>2</sub>-CH<sub>3</sub>); <sup>13</sup>C NMR (75 MHz, DMSO-*d*<sub>6</sub>): δ 154.1 (C<sub>2</sub>), 137.2 (C<sub>3a</sub> and C<sub>7a</sub>), 129.4 (C<sub>5</sub> and C<sub>6</sub>), 114.6 (C<sub>4</sub> and C<sub>7</sub>), 30.9 (C<sub>2</sub>-CH<sub>2</sub>), 21.5 (C<sub>2</sub>-CH<sub>2</sub>-CH<sub>2</sub>), 20.3 (C<sub>5</sub>-CH<sub>3</sub> and C<sub>6</sub>-CH<sub>3</sub>) and 14.1 (C<sub>2</sub>-CH<sub>2</sub>-CH<sub>2</sub>-CH<sub>3</sub>); IR(KBr) 2970, 1454, 1406, 1304, 1002 and 852 cm<sup>-1</sup>; Anal. Calcd for C<sub>12</sub>H<sub>16</sub>N<sub>2</sub>: C, 76.55; H, 8.57; N, 14.88. Found: C, 76.55; H, 8.57; N, 14.89; Yield: 95%

### Compound 3j

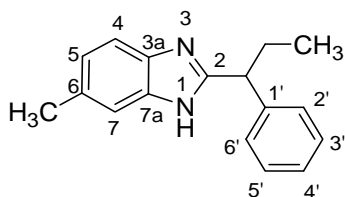

6-Methyl-2-(1-phenyl-propyl)-1H-benzimidazole (**3j**): brown solid; 120 °C (m.p.); <sup>1</sup>H NMR (300 MHz, CDCl<sub>3</sub>): δ (ppm) 8.88 (br s, 1H, N<sub>1</sub>H), 7.43 (d, *J* = 8.1 Hz, 1H, H<sub>4</sub>), 7.33-7.14 (m, 6H, H<sub>7</sub>, H<sub>2'</sub>, H<sub>3'</sub>, H<sub>4'</sub>, H<sub>5'</sub> and H<sub>6'</sub>), 7.04 (d, *J* = 8.1 Hz, 1H, H<sub>5</sub>), 4.14 (t, *J* = 7.5 Hz, 1H, C<sub>2</sub>-CH-CH<sub>2</sub>-CH<sub>3</sub>), 2.52-2.42 (m, 4H, C<sub>6</sub>-CH<sub>3</sub> and ½ C<sub>2</sub>-CH-CH<sub>2</sub>-CH<sub>3</sub>), 2.32-2.11 (m, 1H, ½ C<sub>2</sub>-CH-CH<sub>2</sub>-CH<sub>3</sub>) and 0.93 (t, *J* = 7.5 Hz, 1H, C<sub>2</sub>-CH-CH<sub>2</sub>-CH<sub>3</sub>); <sup>13</sup>C NMR (75 MHz, CDCl<sub>3</sub>): δ 156.3 (C<sub>2</sub>), 140.7 (C<sub>1</sub>), 137.3 (C<sub>3a</sub>), 135.9 (C<sub>7a</sub>), 132.5 (C<sub>6</sub>), 128.8 (C<sub>2'</sub> and C<sub>6'</sub>), 128.0 (C<sub>3'</sub> and C<sub>5'</sub>), 127.2 (C<sub>4'</sub>), 124.1 (C<sub>4</sub>), 114.6 (C<sub>7</sub>), 114.2 (C<sub>5</sub>), 47.8 (C<sub>2</sub>-CH-CH<sub>2</sub>-CH<sub>3</sub>), 27.5 (C<sub>2</sub>-CH-CH<sub>2</sub>-CH<sub>3</sub>), 21.5 (C<sub>6</sub>-CH<sub>3</sub>) and 12.3 (C<sub>2</sub>-CH-CH<sub>2</sub>-CH<sub>3</sub>); IR(KBr) 2928, 1449, 1278, 807 and 697 cm<sup>-1</sup>; Anal. Calcd for C<sub>17</sub>H<sub>18</sub>N<sub>2</sub>: C, 81.56; H, 7.25; N, 11.19. Found: C, 81.57; H, 7.26; N, 11.19; Yield: 78%

### Compound 3k

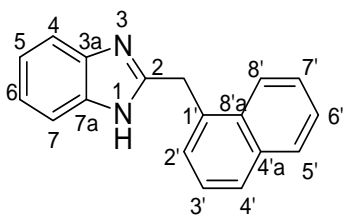

2-Naphthalen-1-ylmethyl-1H-benzimidazole (**3k**): pale pink solid; 230-232 °C (m.p.); <sup>1</sup>H NMR (300 MHz, DMSO-*d*<sub>6</sub>): δ (ppm) 12.18 (br s, 1H, NH), 8.18-8.16 (m, 1H, H<sub>8'</sub>), 7.91-7.88 (m, 1H, H<sub>5'</sub>), 7.84-7.80 (m, 1H, H<sub>4'</sub>), 7.51-7.40 (m, 6H, H<sub>5</sub>, H<sub>6</sub>, H<sub>2'</sub>, H<sub>3'</sub>, H<sub>6'</sub> and H<sub>7'</sub>), 7.07-7.04 (m, 2H, H<sub>4</sub> and H<sub>7</sub>), 4.60 (s, 2H, CH<sub>2</sub>) and 3.32 (s, 6H, CH<sub>3</sub>); <sup>13</sup>C NMR (75 MHz, DMSO-*d*<sub>6</sub>): δ 153.5 (C<sub>2</sub>), 133.6 (C<sub>3a</sub>, C<sub>7a</sub> and C<sub>1</sub>), 133.5 (C<sub>4'a</sub>), 131.7 (C<sub>8'a</sub>), 128.5 (C<sub>5'</sub>), 127.4 (C<sub>4</sub> and C<sub>4'</sub>), 126.3

(C<sub>3'</sub>), 125.8 (C<sub>7</sub> and C<sub>7'</sub>), 125.7 (C<sub>6'</sub>), 124.1 (C<sub>8'</sub>), 121.3 (C<sub>5</sub> and C<sub>6</sub>) and 32.8 (CH<sub>2</sub>); IR(KBr) 2740, 1426, 778 and 742 cm<sup>-1</sup>; Anal. Calcd for C<sub>18</sub>H<sub>14</sub>N<sub>2</sub>: C, 83.69; H, 5.46; N, 10.84. Found: C, 83.70; H, 5.44; N, 10.83; Yield: 75%

### Compound 31

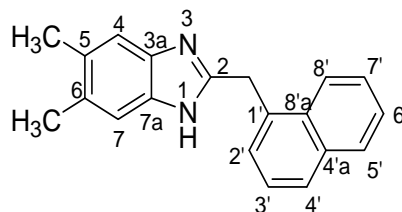

5,6-Dimethyl-2-naphthalen-1-ylmethyl-1H-benzimidazole (**31**): light brown solid; 218 °C (m.p.); <sup>1</sup>H NMR (300 MHz, DMSO-*d*<sub>6</sub>): δ (ppm) 11.90 (br s, 1H, NH), 8.17-8.14 (m, 1H, H<sub>8'</sub>), 7.90-7.87 (m, 1H, H<sub>5'</sub>), 7.82-7.80 (m, 1H, H<sub>4'</sub>), 7.48-7.42 (m, 4H, H<sub>2'</sub>, H<sub>3'</sub>, H<sub>6'</sub> and H<sub>7'</sub>), 7.17 (s, 2H, H<sub>4</sub> and H<sub>7</sub>), 4.55 (s, 2H, CH<sub>2</sub>) and 2.22 (s, 6H, CH<sub>3</sub>); <sup>13</sup>C NMR (75 MHz, DMSO-*d*<sub>6</sub>): δ 152.5 (C<sub>2</sub>), 133.9 (C<sub>1'</sub>), 133.5 (C<sub>4'a</sub>), 131.7 (C<sub>8'a</sub>), 129.5 (C<sub>3a</sub> and C<sub>7a</sub>), 128.5 (C<sub>5'</sub>), 127.34 (C<sub>4</sub> and C<sub>4'</sub>), 127.28 (C<sub>3'</sub>), 126.2 (C<sub>2'</sub>), 125.8 (C<sub>7</sub> and C<sub>7'</sub>), 125.7 (C<sub>6'</sub>), 124.1 (C<sub>8'</sub>), 32.8 (CH<sub>2</sub>) and 19.9 (CH<sub>3</sub>); IR(KBr) 2923, 1448, 1012 and 781 cm<sup>-1</sup>; Anal. Calcd for C<sub>20</sub>H<sub>18</sub>N<sub>2</sub>: C, 83.88; H, 6.34; N, 9.78. Found: C, 83.86; H, 6.35; N, 9.79; Yield: 80 %



### Compound 3m

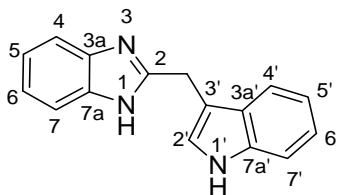

2-(1H-Indol-3-ylmethyl)-1H-benzoimidazole (**3m**): grey solid; 193-194 °C (m.p.); <sup>1</sup>H NMR (300 MHz, DMSO-*d*<sub>6</sub>): δ (ppm) 10.97 (br s, 1H, N<sub>1</sub>H), 7.47-7.41 (m, 3H, H<sub>5</sub>, H<sub>6</sub> and H<sub>4</sub>'), 7.33-7.27 (m, 2H, H<sub>2</sub>' and H<sub>7</sub>'), 7.09-6.97 (m, 3H, H<sub>4</sub>, H<sub>7</sub> and H<sub>6</sub>'), 6.89 (t, *J* = 7.1 Hz, 1H, H<sub>5</sub>') and 4.26 (s, 2H, CH<sub>2</sub>); <sup>13</sup>C NMR (75 MHz, DMSO-*d*<sub>6</sub>): δ 154.4 (C<sub>2</sub>), 136.3 (C<sub>7a</sub>'), 127.0 (C<sub>3a</sub>, C<sub>7a</sub> and C<sub>3'a</sub>'), 123.9 (C<sub>2</sub>'), 121.4 (C<sub>6</sub>'), 121.1 (C<sub>5</sub>'), 118.5 (C<sub>4</sub>'), 117.8 (C<sub>7</sub>'), 114.5 (C<sub>4</sub> and C<sub>7</sub>), 111.5 (C<sub>5</sub> and C<sub>6</sub>), 109.8 (C<sub>3</sub>') and 25.3 (CH<sub>2</sub>); IR(KBr) 3409, 3150, 1449, 1092 and 741 cm<sup>-1</sup>; Anal. Calcd for C<sub>16</sub>H<sub>13</sub>N<sub>3</sub>: C, 77.71; H, 5.30; N, 16.99. Found: C, 77.72; H, 5.30; N, 16.98; Yield: 70%

### Compound 3n

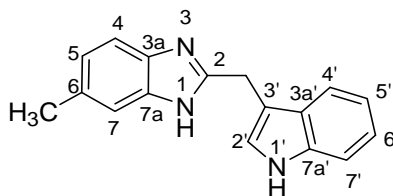

2-(1H-Indol-3-ylmethyl)-6-methyl-1H-benzoimidazole (**3n**): grey solid; 90 °C (m.p.); <sup>1</sup>H NMR (300 MHz, DMSO-*d*<sub>6</sub>): δ (ppm) 11.03 (s, 1H, N<sub>1</sub>H), 7.41-7.32 (m, 4H, H<sub>4</sub>, H<sub>7</sub>, H<sub>4</sub>' and H<sub>7</sub>'), 7.07-7.01 (m, 2H, H<sub>5</sub> and H<sub>6</sub>'), 6.91 (t, *J* = 7.2 Hz, 1H, H<sub>5</sub>'), 4.37 (s, 2H, CH<sub>2</sub>) and 2.37 (s, 3H, CH<sub>3</sub>); <sup>13</sup>C NMR (75 MHz, DMSO-*d*<sub>6</sub>): δ 154.0 (C<sub>2</sub>), 136.3 (C<sub>7a</sub>'), 130.2 (C<sub>3a</sub>, C<sub>7a</sub> and C<sub>6</sub>), 127.0 (C<sub>3'a</sub>'), 123.7 (C<sub>2</sub>'), 122.5 (C<sub>6</sub>'), 121.1 (C<sub>5</sub>'), 118.49 (C<sub>4</sub>'), 118.46 (C<sub>5</sub> and C<sub>7</sub>'), 111.4 (C<sub>4</sub> and C<sub>7</sub>), 110.1 (C<sub>3</sub>'), 25.4 (CH<sub>2</sub>) and 21.3 (CH<sub>3</sub>); IR(KBr) 3392 and 742 cm<sup>-1</sup>; Anal. Calcd for C<sub>17</sub>H<sub>15</sub>N<sub>3</sub>: C, 78.13; H, 5.79; N, 16.08. Found: C, 78.13; H, 5.78; N, 16.09; Yield: 75%

### Compound 3o

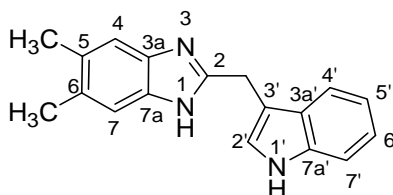

2-(1H-Indol-3-ylmethyl)-5,6-dimethyl-1H-benzoimidazole (**3o**): light grey solid; 190 °C (m.p.);

$^1\text{H}$  NMR (300 MHz, DMSO- $d_6$ ):  $\delta$  (ppm) 11.60 (br s, 1H,  $\text{N}_1\text{H}$ ), 10.90 (s, 1H,  $\text{N}_1\text{H}$ ), 7.41 (d,  $J = 7.8$  Hz, 1H,  $\text{H}_{4'}$ ), 7.31 (d,  $J = 8.2$  Hz, 1H,  $\text{H}_{7'}$ ), 7.22 (d,  $J = 2.1$  Hz, 1H,  $\text{H}_{2'}$ ), 7.17 (s, 2H,  $\text{H}_4$  and  $\text{H}_7$ ), 7.01 (t,  $J = 7.2$  Hz, 1H,  $\text{H}_{6'}$ ), 6.88 (t,  $J = 7.1$  Hz, 1H,  $\text{H}_{5'}$ ), 4.19 (s, 2H,  $\text{CH}_2$ ) and 2.22 (s, 6H,  $\text{CH}_3$ );  $^{13}\text{C}$  NMR (75 MHz, DMSO- $d_6$ ):  $\delta$  153.6 ( $\text{C}_2$ ), 136.4 ( $\text{C}_{7a}$ ), 129.5 ( $\text{C}_{3a}$  and  $\text{C}_{7a}$ ), 127.1 ( $\text{C}_{3'}$  and  $\text{C}_{3'a}$ ), 123.8 ( $\text{C}_{2'}$ ), 121.2 ( $\text{C}_{5'}$  and  $\text{C}_{6'}$ ), 118.6 ( $\text{C}_{4'}$ ), 111.6 ( $\text{C}_4$ ,  $\text{C}_7$  and  $\text{C}_{7'}$ ), 110.4 ( $\text{C}_5$  and  $\text{C}_6$ ), 25.5 ( $\text{CH}_2$ ) and 20.1 ( $\text{CH}_3$ ); IR(KBr) 3385, 2929, 1448 and 735  $\text{cm}^{-1}$ ; Anal. Calcd for  $\text{C}_{18}\text{H}_{17}\text{N}_3$ : C, 78.52; H, 6.22; N, 15.26. Found: C, 78.51; H, 6.24; N, 15.25; Yield: 86%

### Compound 3p

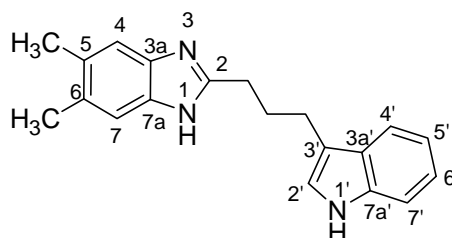

2-[3-(1H-Indol-3-yl)-propyl]-5,6-dimethyl-1H-benzoimidazole (**3p**): light grey solid; 96 °C

(m.p.);  $^1\text{H}$  NMR (300 MHz, DMSO- $d_6$ ):  $\delta$  (ppm) 10.77 (s, 1H,  $\text{N}_1\text{H}$ ), 7.47 (d,  $J = 7.7$  Hz, 1H,  $\text{H}_{4'}$ ), 7.30 (d,  $J = 8.0$  Hz, 1H,  $\text{H}_{7'}$ ), 7.18 (s, 2H,  $\text{H}_4$  and  $\text{H}_7$ ), 7.11 (s, 1H,  $\text{H}_{2'}$ ), 7.02 (t,  $J = 7.2$  Hz, 1H,  $\text{H}_{6'}$ ), 6.92 (t,  $J = 7.2$  Hz, 1H,  $\text{H}_{5'}$ ), 2.81-2.70 (m, 4H,  $\text{C}_2\text{-CH}_2$  and  $\text{C}_3\text{-CH}_2$ ), 2.23 (s, 6H,  $\text{CH}_3$ ) and 2.13-2.06 (m, 2H,  $\text{C}_2\text{-CH}_2\text{-CH}_2$ );  $^{13}\text{C}$  NMR (75 MHz, DMSO- $d_6$ ):  $\delta$  154.2 ( $\text{C}_2$ ), 136.4 ( $\text{C}_{7a}$ ),

129.2 ( $C_{3a}$  and  $C_{7a}$ ), 127.3 ( $C_{3'}$  and  $C_{3'a}$ ), 122.4 ( $C_{2'}$ ), 120.9 ( $C_6'$ ), 118.4 ( $C_{4'}$ ), 118.2 ( $C_{5'}$ ), 114.1 ( $C_4$ ,  $C_5$ ,  $C_6$  and  $C_7$ ), 111.4 ( $C_7$ ), 28.5 ( $C_2$ - $\underline{CH_2}$ - $\underline{CH_2}$ ), 24.4 ( $C_{3'}$ - $\underline{CH_2}$ ) and 20.0 ( $\underline{CH_3}$ ); IR(KBr) 3409 and 743  $\text{cm}^{-1}$ ; Anal. Calcd for  $C_{20}H_{21}N_3$ : C, 79.17; H, 6.98; N, 13.85. Found: C, 79.16; H, 6.97; N, 13.87; Yield: 79%

### Compound 3q

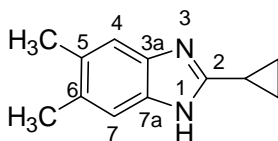

2-Cyclopropyl-5,6-dimethyl-1H-benzimidazole (**3q**): light brown solid; 220 °C (m.p.);  $^1\text{H}$  NMR (300 MHz,  $\text{DMSO-}d_6$ ):  $\delta$  (ppm) 11.86 (br s, 1H,  $\text{N}_1\text{H}$ ), 7.12 (s, 2H,  $\text{H}_4$  and  $\text{H}_7$ ), 2.22 (s, 6H,  $\text{C}_5$ - $\underline{\text{CH}_3}$  and  $\text{C}_6$ - $\underline{\text{CH}_3}$ ), 2.03-1.98 (m, 1H, cyclopropyl  $\underline{\text{CH}}$ ) and 0.97-0.93 (m, 4H, cyclopropyl  $\underline{\text{CH}_2}$ );  $^{13}\text{C}$  NMR (75 MHz,  $\text{DMSO-}d_6$ ):  $\delta$  155.9 ( $C_2$ ), 129.0 ( $C_{3a}$  and  $C_{7a}$ ), 117.8 ( $C_4$ ,  $C_5$ ,  $C_6$  and  $C_7$ ), 19.9 ( $\text{C}_5$ - $\underline{\text{CH}_3}$  and  $\text{C}_6$ - $\underline{\text{CH}_3}$ ), 9.5 (cyclopropyl  $\underline{\text{CH}}$ ) and 8.5 (cyclopropyl  $\underline{\text{CH}_2}$ ); IR(KBr) 2896, 1437, 1307, 998 and 853  $\text{cm}^{-1}$ ; Anal. Calcd for  $C_{12}H_{14}N_2$ : C, 77.38; H, 7.58; N, 15.04. Found: C, 77.39; H, 7.60; N, 15.03; Yield: 90%

### Compound 3r

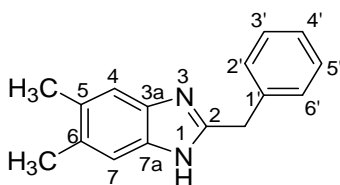

2-Benzyl-5,6-dimethyl-1H-benzimidazole (**3r**): greenish-brown solid; 104-105 °C (m.p.);  $^1\text{H}$  NMR (300 MHz,  $\text{CDCl}_3$ ):  $\delta$  (ppm) 7.29-7.26 (m, 7H,  $\text{H}_4$ ,  $\text{H}_7$ ,  $\text{H}_{2'}$ ,  $\text{H}_{3'}$ ,  $\text{H}_{4'}$ ,  $\text{H}_{5'}$  and  $\text{H}_{6'}$ ), 4.23 (s, 2H,  $\underline{\text{CH}_2}$ ) and 2.35 ( $\text{C}_5$ - $\underline{\text{CH}_3}$  and  $\text{C}_6$ - $\underline{\text{CH}_3}$ );  $^{13}\text{C}$  NMR (75 MHz,  $\text{DMSO-}d_6$ ):  $\delta$  152.4 ( $C_2$ ), 136.3

(C<sub>3a</sub>), 136.2 (C<sub>7a</sub>), 131.6 (C<sub>1'</sub>), 128.93 (C<sub>2'</sub> and C<sub>6'</sub>), 128.87 (C<sub>3'</sub> and C<sub>5'</sub>), 127.2 (C<sub>4'</sub>), 114.8 (C<sub>4</sub> and C<sub>7</sub>), 35.3 (CH<sub>2</sub>) and 20.2 (C<sub>5</sub>-CH<sub>3</sub> and C<sub>6</sub>-CH<sub>3</sub>); IR(KBr) 1636, 1463, 1444, 1422, 1313 and 721 cm<sup>-1</sup>; Anal. Calcd for C<sub>16</sub>H<sub>16</sub>N<sub>2</sub>: C, 81.32; H, 6.82; N, 11.85. Found: C, 81.33; H, 6.83; N, 11.84; Yield: 95%
