# Supplementary material for: Synthesis of 2-alkyl substituted benzimidazoles under microwave irradiation: Anti-proliferative effect of some representative compounds on human histiocytic lymphoma cell U937
Source: Royal Society of Chemistry journal article supplement (doi:10.1039/c1ra00470k), 2011-01-01

# Synthesis of 2-alkyl substituted benzimidazoles under microwave irradiation: Anti-proliferative effect of some representative compounds on human histiocytic lymphoma cell U937

Chhanda Mukhopadhyay,<sup>\*a</sup> Sabari Ghosh,<sup>a</sup> Sumita Sengupta (Bandyopadhyay)<sup>b</sup> and Soumasree De<sup>b</sup>

<sup>a</sup>Department of Chemistry, University of Calcutta, 92 APC Road, Kolkata-700009, India; Tel: +91 9433019610; E-mail: cmukhop@yahoo.co.in

<sup>b</sup> Department of Biophysics, Molecular Biology and Bioinformatics, University of Calcutta, 92 APC Road, Kolkata-700009, India

## Supplementary Information Part 2

### 2D-NMR of Compound 3l in DMSO-*d*<sub>6</sub>

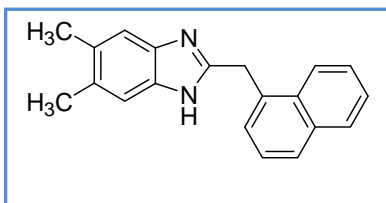

### HMBC (Compound 3l)

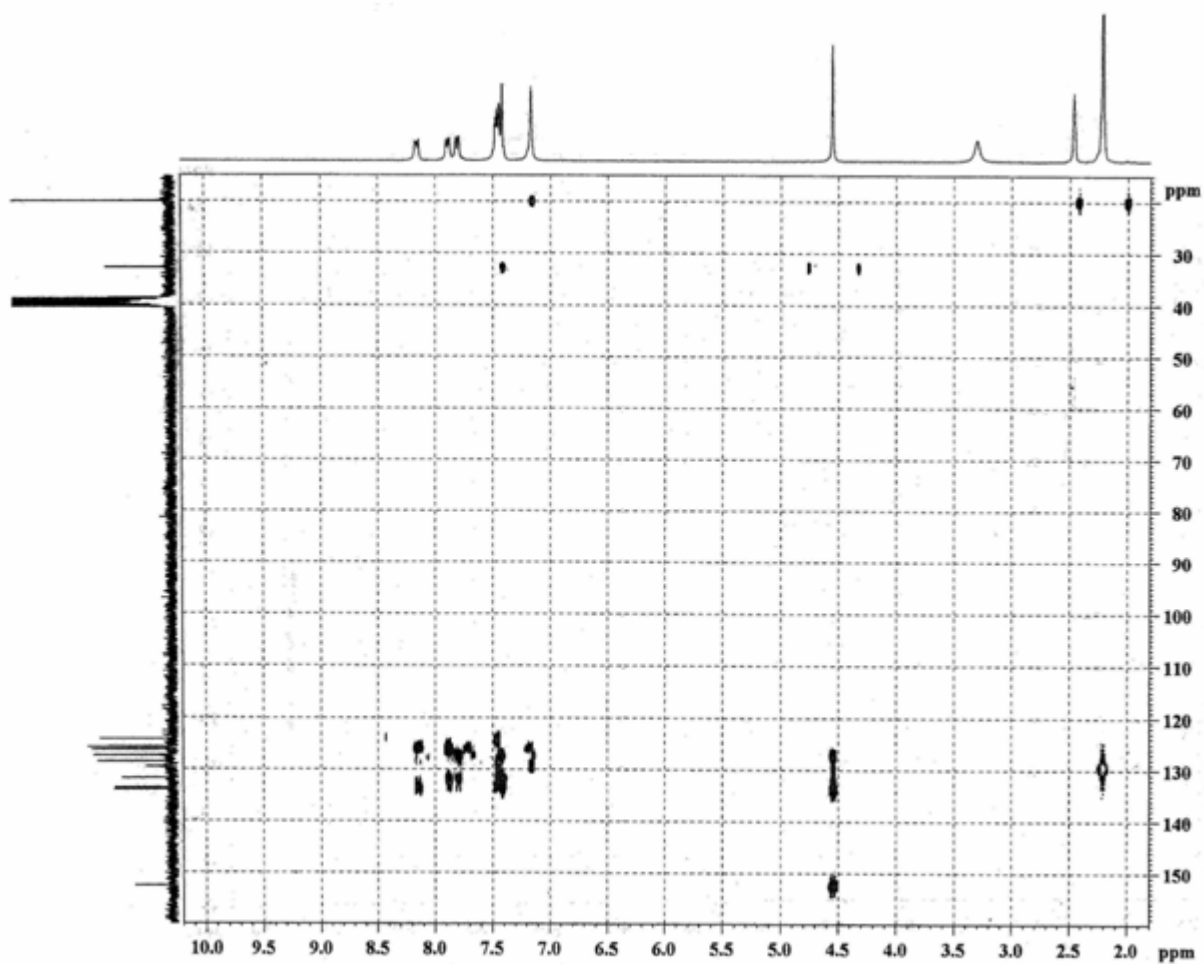

### HMBC expansion 1 (Compound 3l)

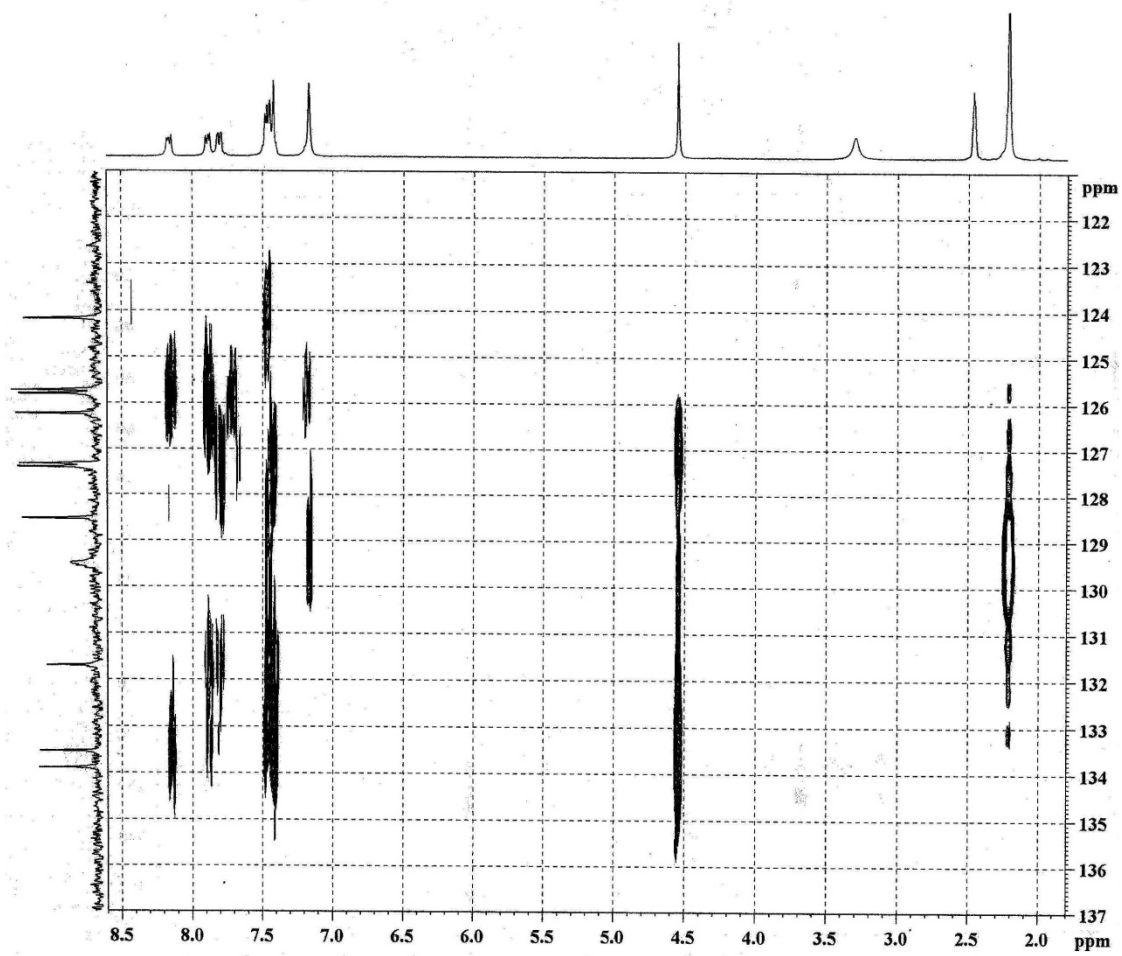

### HMBC expansion 2 (Compound 3l)

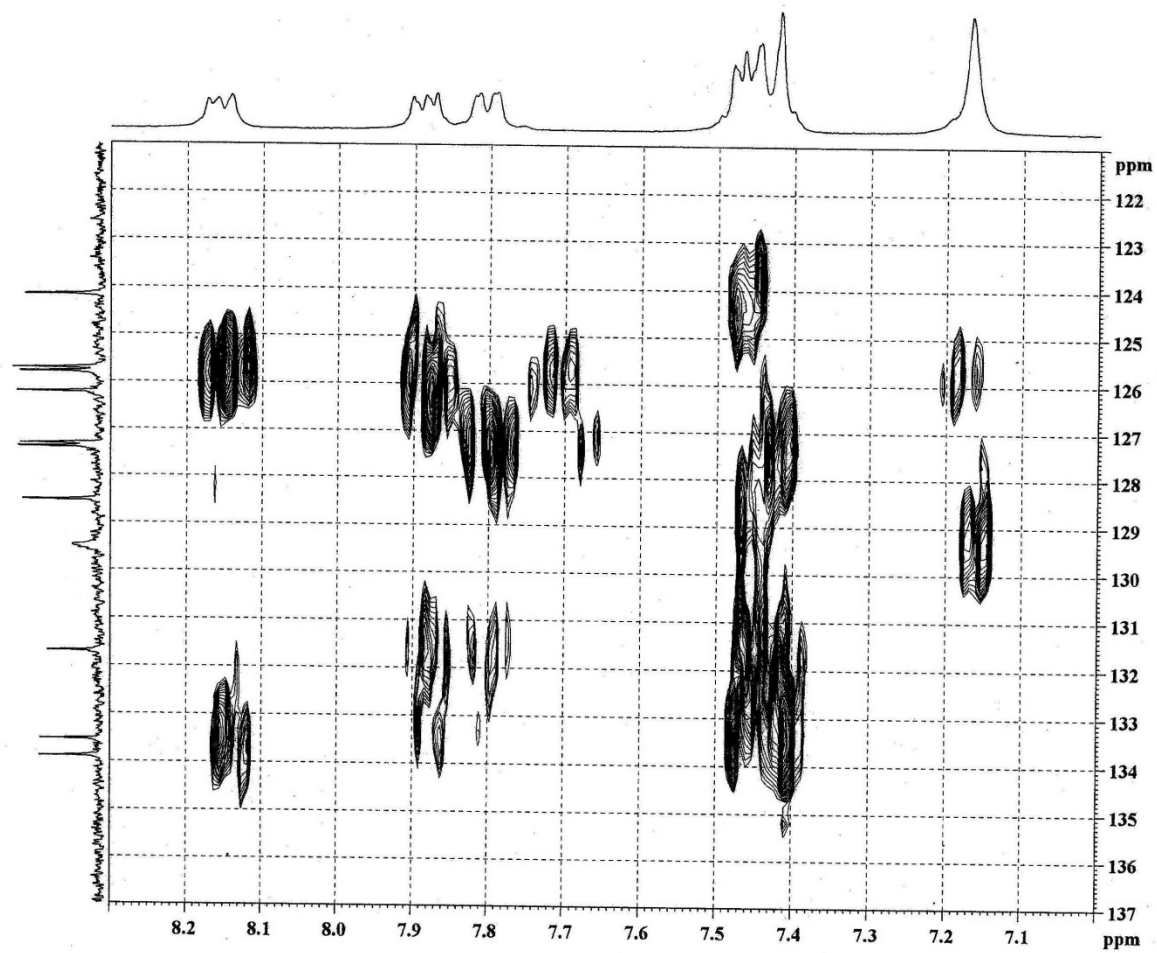

### HSQC (Compound 3l)

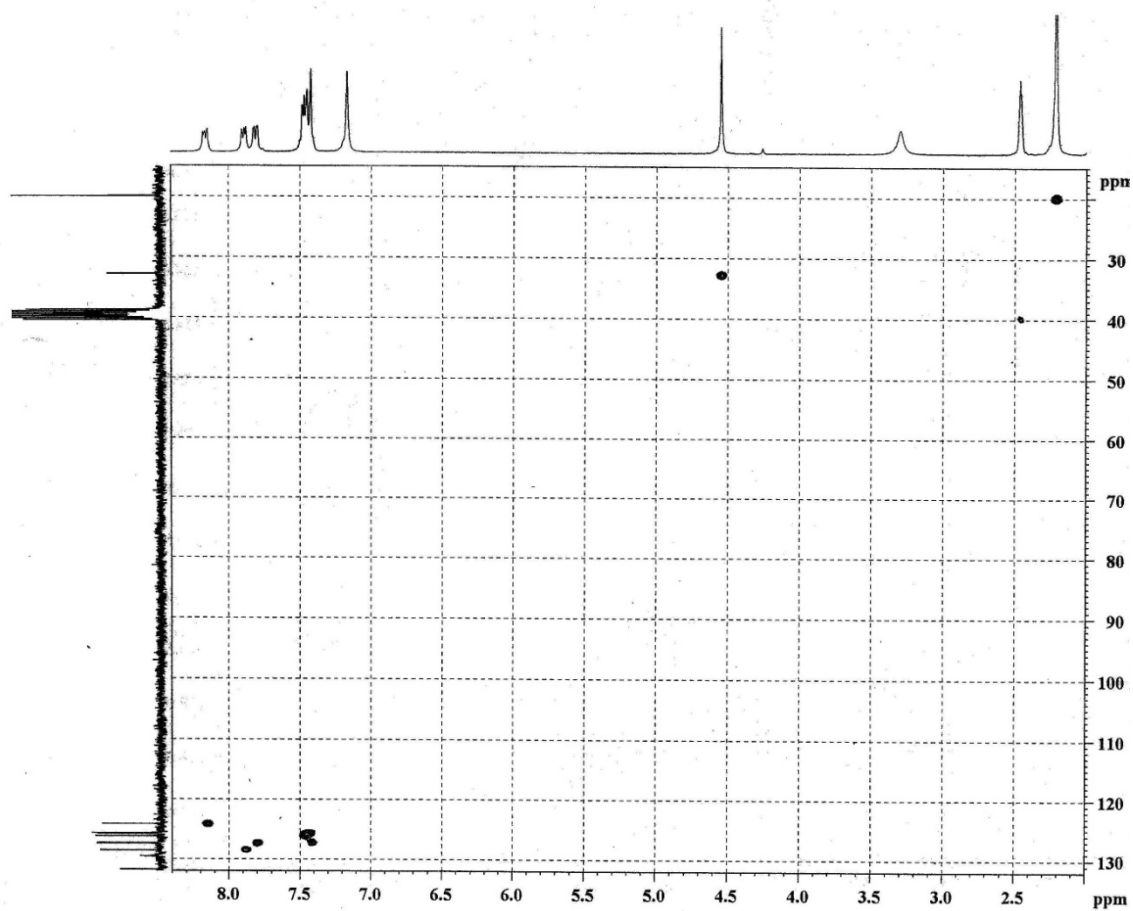

### HSQC expansion (Compound 3l)

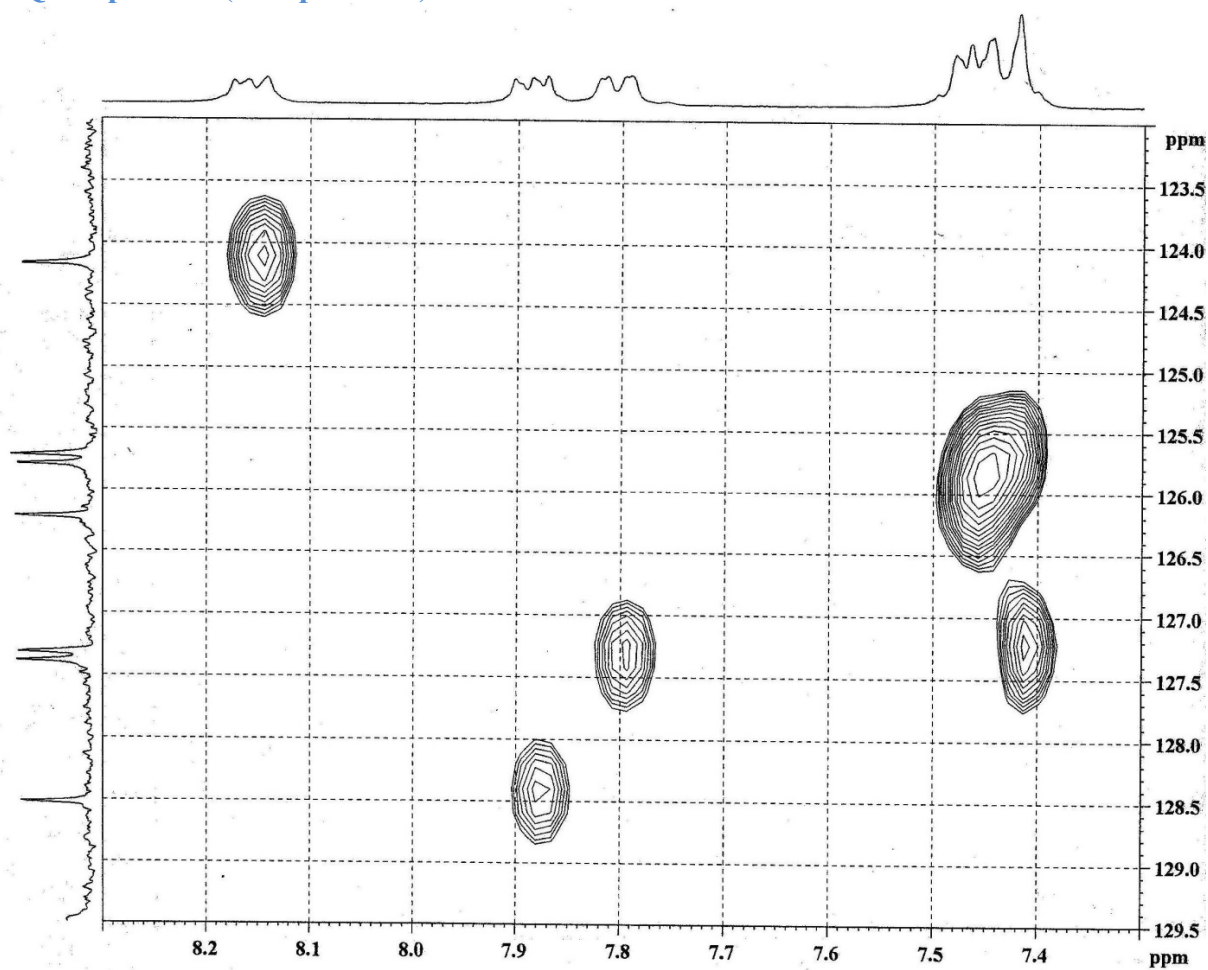

### NOESY (Compound 3l)

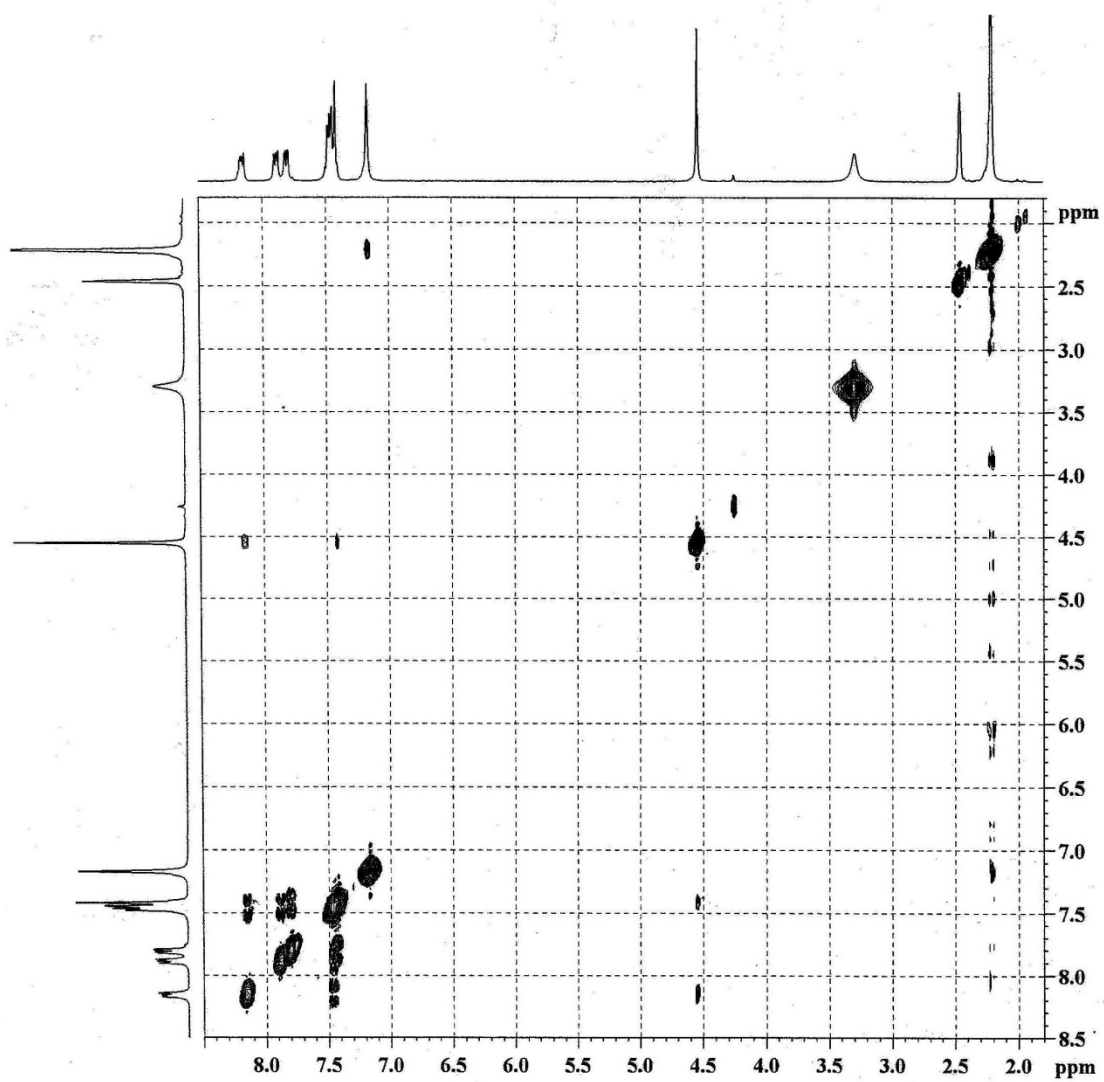

### COSY (Compound 3l)

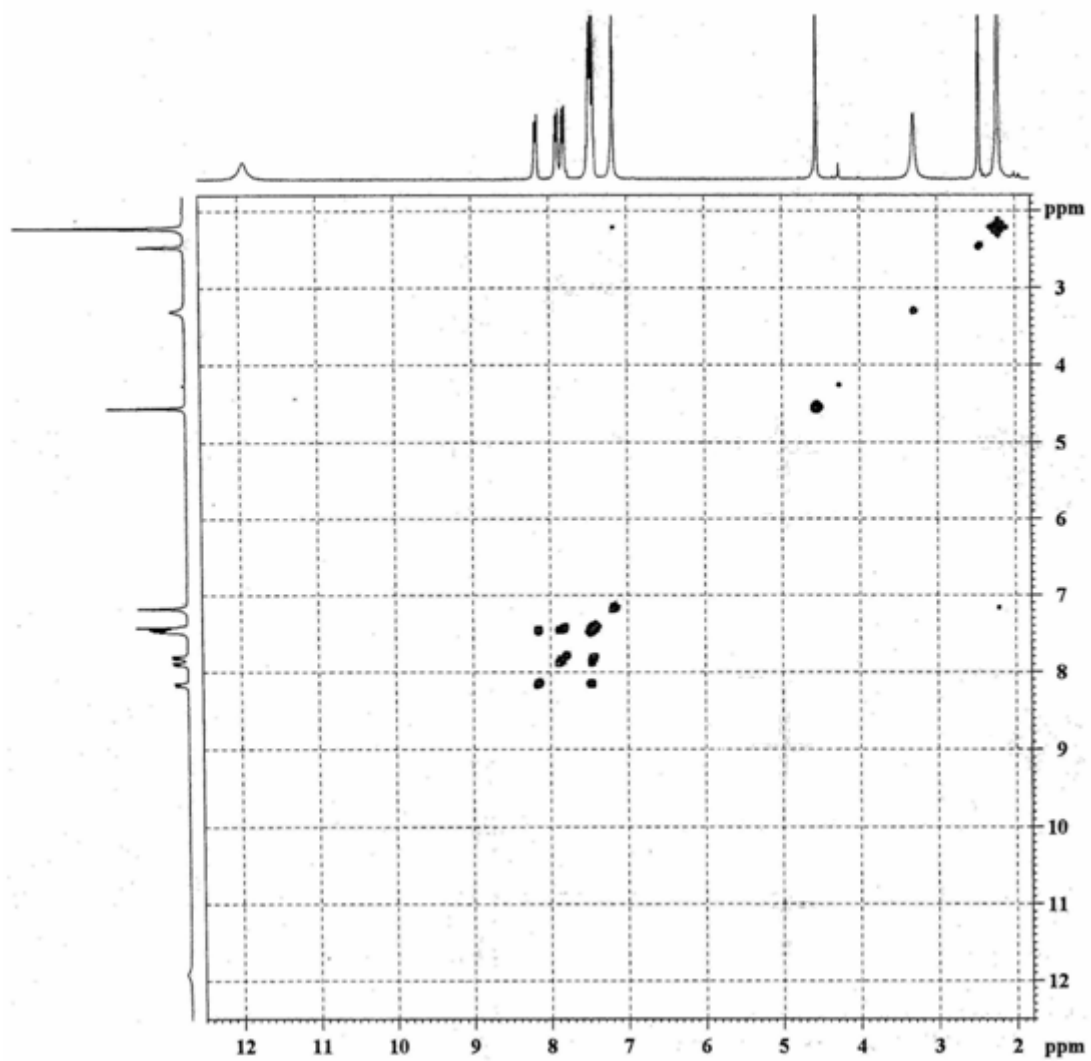



### COSY expansion (Compound 3l)

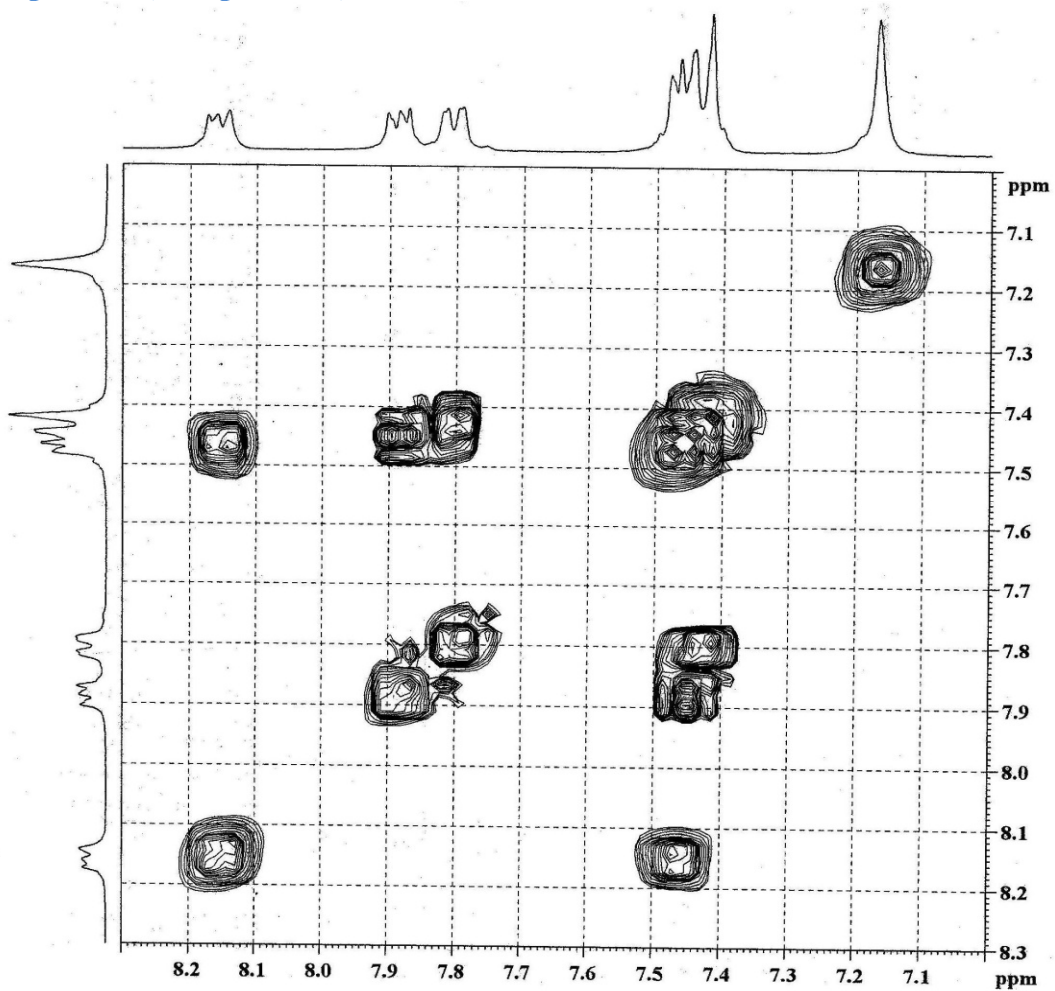

Supplement: c1ra00470k_2.pdf [file c1ra00470k_2.pdf]
